# Supplementary material
Source: PubMed Central journal article supplement (PMC7322478)
Supplement: mmc2.pdf [file mmc2.pdf]

# 1

## Delving Deep into the Structural Aspects of A Furin Cleavage Site Inserted into the Spike Protein of SARS-CoV-2: Supplementary materials

## Amino acid sequence alignment

|      |                                                 |     |
|------|-------------------------------------------------|-----|
| QHD  | MFVFLVLLPLVSSQCVNLTTRTQLPPAYTNSFTRGVYYPDKVFRS   | 45  |
| 6VSB | MFVFLVLLPLVSSQCVNLTTRTQLPPAYTNSFTRGVYYPDKVFRS   | 45  |
| QHD  | SVLHSTQDLFLPFFSNVTWFHAIHVSGTNGTKRFDNPVLPFNDGV   | 90  |
| 6VSB | SVLHSTQDLFLPFFSNVTWFHAIHVSGTNGTKRFDNPVLPFNDGV   | 90  |
| QHD  | YFASTEKSNIIIRGWIFGTTLDSKTQSLLIVNNATNVVIKVFCEFOF | 135 |
| 6VSB | YFASTEKSNIIIRGWIFGTTLDSKTQSLLIVNNATNVVIKVFCEFOF | 135 |
| QHD  | CNDPFLGVYYHKNNKSWMESEFRVYSSANNCTFEYVSQPFLMDLE   | 180 |
| 6VSB | CNDPFLGVYYHKNNKSWMESEFRVYSSANNCTFEYVSQPFLMDLE   | 180 |
| QHD  | GKQGNFKNLREFVFKNIDGYFKIYKHTPINLVRDLPQGFSALEP    | 225 |
| 6VSB | GKQGNFKNLREFVFKNIDGYFKIYKHTPINLVRDLPQGFSALEP    | 225 |
| QHD  | LVDLPIGINITRFQTLALHRSYLTTPGDSSSGWTAGAAAYVGYL    | 270 |
| 6VSB | LVDLPIGINITRFQTLALHRSYLTTPGDSSSGWTAGAAAYVGYL    | 270 |
| QHD  | QPRTFLLKYNENGTITDAVDCALDPLSETKCTLKSFTVEKGIYQT   | 315 |
| 6VSB | QPRTFLLKYNENGTITDAVDCALDPLSETKCTLKSFTVEKGIYQT   | 315 |
| QHD  | SNFRVQPTESIIVRFPNITNLCPFGEVFNATRFASVYAWNRKRISN  | 360 |
| 6VSB | SNFRVQPTESIIVRFPNITNLCPFGEVFNATRFASVYAWNRKRISN  | 360 |
| QHD  | CVADYSVLYNSASFSTFKCYGVSPTKLNDLCFTNVYADSFVIRGD   | 405 |
| 6VSB | CVADYSVLYNSASFSTFKCYGVSPTKLNDLCFTNVYADSFVIRGD   | 405 |
| QHD  | EVROIAPGQTGKIADYNYKLPDDFTGCVIAWNSNNLDSKVGGNYN   | 450 |
| 6VSB | EVROIAPGQTGKIADYNYKLPDDFTGCVIAWNSNNLDSKVGGNYN   | 450 |
| QHD  | YLYRLF RKSNLKPFERDISTEIQAGSTPCNGVEGFNCYFPLQSY   | 495 |
| 6VSB | YLYRLF RKSNLKPFERDISTEIQAGSTPCNGVEGFNCYFPLQSY   | 495 |
| QHD  | GFQPTNGVGYQPYRVVLSFELLHAPATVCGPKKSTNLVKNKCVN    | 540 |
| 6VSB | GFQPTNGVGYQPYRVVLSFELLHAPATVCGPKKSTNLVKNKCVN    | 540 |
| QHD  | FNFNGLTGTGVLTESNKKFLPFQOFGRDIADTTDAVRDPQTLLEIL  | 585 |
| 6VSB | FNFNGLTGTGVLTESNKKFLPFQOFGRDIADTTDAVRDPQTLLEIL  | 585 |
| QHD  | DITPCSEGGVSVITPGTNTSNQVAVLYQDVNCTEVPVAIHADQLT   | 630 |
| 6VSB | DITPCSEGGVSVITPGTNTSNQVAVLYQDVNCTEVPVAIHADQLT   | 630 |
| QHD  | PTWRVYSTGSNVFQTRAGCLIGAHEVNNSYECDIPIGAGICASYQ   | 675 |
| 6VSB | PTWRVYSTGSNVFQTRAGCLIGAHEVNNSYECDIPIGAGICASYQ   | 675 |

|      |          |                                          |                                 |                    |                  |             |      |
|------|----------|------------------------------------------|---------------------------------|--------------------|------------------|-------------|------|
| QHD  | TQTNSP   | RRAR                                     | SVASQSI                         | IAYTMSLGAENSVAYSNN | SI               | AIPTNFTI    | 720  |
| 6VSB | TQTNSP   | GSAS                                     | SVASQSI                         | IAYTMSLGAENSVAYSNN | SI               | AIPTNFTI    | 720  |
| QHD  | SVTTEILP | VSMTKTSVDCTMYICGDST                      | ECNLLLO                         | YGSFCTQLNR         |                  |             | 765  |
| 6VSB | SVTTEILP | VSMTKTSVDCTMYICGDST                      | ECNLLLO                         | YGSFCTQLNR         |                  |             | 765  |
| QHD  | ALTGIAVE | QDKNTQEVFAQVKQIYKTPPIKDFGGFNFSQILPDPS    |                                 |                    |                  |             | 810  |
| 6VSB | ALTGIAVE | QDKNTQEVFAQVKQIYKTPPIKDFGGFNFSQILPDPS    |                                 |                    |                  |             | 810  |
| QHD  | KPSKR    | SFIEDLLFNKVT                             | LADAGFIKQYGDCLG                 | DAARDL             | ICAQKF           |             | 855  |
| 6VSB | KPSKR    | SFIEDLLFNKVT                             | LADAGFIKQYGDCLG                 | DAARDL             | ICAQKF           |             | 855  |
| QHD  | NGLTVLP  | PPLLTDEMIAQYTSALLAGTITSGWTFGAGAALQIPFAM  |                                 |                    |                  |             | 900  |
| 6VSB | NGLTVLP  | PPLLTDEMIAQYTSALLAGTITSGWTFGAGAALQIPFAM  |                                 |                    |                  |             | 900  |
| QHD  | QMAYRF   | NGIGVTONVLYENQKLIANQFN                   | SAIGKIQDSL                      | SSTASAL            |                  |             | 945  |
| 6VSB | QMAYRF   | NGIGVTONVLYENQKLIANQFN                   | SAIGKIQDSL                      | SSTASAL            |                  |             | 945  |
| QHD  | GKLQDV   | VNQNQAALNTLVKQLSSNFGAISSVLNDILSRLD       | KVEAE                           |                    |                  |             | 990  |
| 6VSB | GKLQDV   | VNQNQAALNTLVKQLSSNFGAISSVLNDILSRLD       | PEAE                            |                    |                  |             | 990  |
| QHD  | VOIDRL   | LITGRLOSLOTYVTOQLIRAAEIRASANLAATKMSECVLG |                                 |                    |                  |             | 1035 |
| 6VSB | VOIDRL   | LITGRLOSLOTYVTOQLIRAAEIRASANLAATKMSECVLG |                                 |                    |                  |             | 1035 |
| QHD  | QSKRVDF  | CGKGYHLSFPOSAPHG                         | VVFLHV                          | TYVPAQEK           | NFTTAPA          |             | 1080 |
| 6VSB | QSKRVDF  | CGKGYHLSFPOSAPHG                         | VVFLHV                          | TYVPAQEK           | NFTTAPA          |             | 1080 |
| QHD  | ICH      | DGKAHFPREGVFVSN                          | GTHWFVTQRNFYEPQI                | ITTDNTFVSGN        |                  |             | 1125 |
| 6VSB | ICH      | DGKAHFPREGVFVSN                          | GTHWFVTQRNFYEPQI                | ITTDNTFVSGN        |                  |             | 1125 |
| QHD  | CDVVIG   | I                                        | VNNTVYDPLQPELDSFKEELDKYFKNHTSPD | VLDGDIS            |                  |             | 1170 |
| 6VSB | CDVVIG   | I                                        | VNNTVYDPLQPELDSFKEELDKYFKNHTSPD | VLDGDIS            |                  |             | 1170 |
| QHD  | GINASV   | VNIQKEIDRLNEVAKNLNESLIDLQELGKYE          | QYIKWPWY                        |                    |                  |             | 1215 |
| 6VSB | GINASV   | VNIQKEIDRLNEVAKNLNESLIDLQELGKYE          | QGSYIPE                         |                    |                  |             | 1215 |
| QHD  | IWLGF    | I                                        | AGLIAIVMVTIMLCCMTSCCSC          | L                  | KGCCSCGSCCKFDEDD |             | 1260 |
| 6VSB | APRDGQ   | A                                        | YVRKDGEWVLLSTFLGRSLEV           | L                  | FQGP             | GHHHHHHHSAW | 1260 |
| QHD  | SE       | P                                        | VLKGVKLHYT                      |                    |                  |             | 1273 |
| 6VSB | SH       | P                                        | QFEKGGGSGG                      | GGSGGSAWSHPQFEK    |                  |             | 1288 |

☒ non conserved

☒ ≥50% conserved

**Figure 1.1** Alignment of amino acid sequences of QHD43416.1(QHD, GenBank access code for S protein of SARS-CoV-2) and 6VSB (PDB access code for a Cryo-EM structure of S protein of SARS-CoV-2). Here, 6VSB represents the structural template for homology structural modeling with the SwissModel server (<https://swissmodel.expasy.org/interactive>).

CHAPTER 1. DELVING DEEP INTO THE STRUCTURAL ASPECTS OF A FURIN CLEAVAGE SITE  
 INSERTED INTO THE SPIKE PROTEIN OF SARS-COV-2: SUPPLEMENTARY MATERIALS

4

|       |                                               |                                           |                        |                     |       |     |
|-------|-----------------------------------------------|-------------------------------------------|------------------------|---------------------|-------|-----|
| 6VSB  | MFVFLVLLPLVSSQCVNLTTRTQLPP                    | AYTNSFTRGVVYYPDKVFRS                      | 45                     |                     |       |     |
| 6VSBA | .....                                         | AYTNSFTRGVVYYPDKVFRS                      | 19                     |                     |       |     |
| 6VSBB | .....                                         | AYTNSFTRGVVYYPDKVFRS                      | 19                     |                     |       |     |
| 6VSBC | .....                                         | AYTNSFTRGVVYYPDKVFRS                      | 19                     |                     |       |     |
|       |                                               |                                           |                        |                     |       |     |
| 6VSB  | SVLHSTQDLFLPFFSNVTWFH                         | AIHVSSGTNGTKRFDNP                         | VLPFNDGV               | 90                  |       |     |
| 6VSBA | SVLHSTQDLFLPFFSNVTWFH                         | FDNP                                      | .....                  | VLPFNDGV            | 52    |     |
| 6VSBB | SVLHSTQDLFLPFFSNVTWFH                         | NP                                        | .....                  | VLPFNDGV            | 50    |     |
| 6VSBC | SVLHSTQDLFLPFFSNVTWFH                         | DN                                        | .....                  | VLPFNDGV            | 51    |     |
|       |                                               |                                           |                        |                     |       |     |
| 6VSB  | YFAST                                         | EKSNIIRGWIFGTTLDSKTQSLLIVNNATNVVIKVFCEFOF | 135                    |                     |       |     |
| 6VSBA | YFAST                                         | N...IIRGWIFGTTLDSKTQSLLIVNNATNVVIKVFCEFOF | 94                     |                     |       |     |
| 6VSBB | YFAST                                         | EKSNIIRGWIFGTTLDSKTQSLLIVNNATNVVIKVFCEFOF | 95                     |                     |       |     |
| 6VSBC | YFAST                                         | N...IIRGWIFGTTLDSKTQSLLIVNNATNVVIKVFCEFOF | 93                     |                     |       |     |
|       |                                               |                                           |                        |                     |       |     |
| 6VSB  | CNDPFLG                                       | VYYHKNNKSWMSE                             | FRVYSSANNCTFEYVSQPF    | MD                  | LE    | 180 |
| 6VSBA | CNDPFLG                                       | E                                         | .....                  | FRVYSSANNCTFEYVSQPF | LKNLR | 126 |
| 6VSBB | CNDPFL                                        | SE                                        | .....                  | FRVYSSANNCTFEYVSQPF | LKNLR | 127 |
| 6VSBC | CNDPF                                         | F                                         | .....                  | RVYSSANNCTFEYVSQPF  | LKNLR | 122 |
|       |                                               |                                           |                        |                     |       |     |
| 6VSB  | GKQGNFKNLR                                    | EFVFKNIDGYFKIYSKHTPINLVRDLPQGFSALEP       | 225                    |                     |       |     |
| 6VSBA | .....                                         | EFVFKNIDGYFKIYSKHTPINLVRDLPQGFSALEP       | 161                    |                     |       |     |
| 6VSBB | .....                                         | EFVFKNIDGYFKIYSKHTP                       | P.....QGFSALEP         | 155                 |       |     |
| 6VSBC | .....                                         | EFVFKNIDGYFKIYSKHTPINLVRDLPQGFSALEP       | 157                    |                     |       |     |
|       |                                               |                                           |                        |                     |       |     |
| 6VSB  | LVDLPIGINITRFQTLALHR                          | SYLTPGDSSSGWTAG                           | AAAYYVGYL              | 270                 |       |     |
| 6VSBA | LVDLPIGINITRFQTLALHR                          | G                                         | .....                  | AAAYYVGYL           | 192   |     |
| 6VSBB | LVDLPIGINITRFQTLA                             | AYY                                       | .....                  | .....VGYL           | 180   |     |
| 6VSBC | LVDLPIGINITRFQTLALH                           | G                                         | .....                  | AAAYYVGYL           | 187   |     |
|       |                                               |                                           |                        |                     |       |     |
| 6VSB  | QPRTFLLKYNENGTITDAVDCALDPLSETKCTLKSFTVEKGIYQT | 315                                       |                        |                     |       |     |
| 6VSBA | QPRTFLLKYNENGTITDAVDCALDPLSETKCTLKSFTVEKGIYQT | 237                                       |                        |                     |       |     |
| 6VSBB | QPRTFLLKYNENGTITDAVDCALDPLSETKCTLKSFTVEKGIYQT | 225                                       |                        |                     |       |     |
| 6VSBC | QPRTFLLKYNENGTITDAVDCALDPLSETKCTLKSFTVEKGIYQT | 232                                       |                        |                     |       |     |
|       |                                               |                                           |                        |                     |       |     |
| 6VSB  | SNFRVQPTESIVRFPNITNLCPFGEVFNATRFASVYAWNRKRISN | 360                                       |                        |                     |       |     |
| 6VSBA | SNFRVQPTESIVR                                 | .....LCPFGEVFNATRFASVYAWNRKRISN           | 276                    |                     |       |     |
| 6VSBB | SNFRVQPTESIVRFPNITNLCPFGEVFNATRFASVYAWNRKRISN | 270                                       |                        |                     |       |     |
| 6VSBC | SNFRVQPTESIVRFPNITNLCPFGEVFNATRFASVYAWNRKRISN | 277                                       |                        |                     |       |     |
|       |                                               |                                           |                        |                     |       |     |
| 6VSB  | CVADYSVLYNSASFSTFKCYGVSPTKLNDLCFTNVYADSFVIRGD | 405                                       |                        |                     |       |     |
| 6VSBA | CVADYSVLYNSASFSTFKCYGVSPTKLNDLCFTNVYADSFVIRGD | 321                                       |                        |                     |       |     |
| 6VSBB | CVADYSVLYNSASFSTFKCYGVSPTKLNDLCFTNVYADSFVIRGD | 315                                       |                        |                     |       |     |
| 6VSBC | CVADYSVLYNSASFSTFKCYGVSPTKLNDLCFTNVYADSFVIRGD | 322                                       |                        |                     |       |     |
|       |                                               |                                           |                        |                     |       |     |
| 6VSB  | EVRQIAPGQTGKIADYNYKLPDDFTGCVIAWNSNNLDS        | KVGGNYN                                   | 450                    |                     |       |     |
| 6VSBA | EVRQIAPGQTGKIADYNYKLPDDFTGCVIAWNSNNLDS        | YN                                        | .....                  | 361                 |       |     |
| 6VSBB | EVRQIAPGQTGKIADYNYKLPDDFTGCVIAWNSNNLDS        | YN                                        | .....                  | 355                 |       |     |
| 6VSBC | EVRQIAPGQTGKIADYNYKLPDDFTGCVIAWNSNNLDS        | YN                                        | .....                  | 362                 |       |     |
|       |                                               |                                           |                        |                     |       |     |
| 6VSB  | YLYRFLFRKS                                    | NLKPFFERDISTEIIY                          | QAGSTPCNGVEGFNCYFPLQSY | 495                 |       |     |
| 6VSBA | .....                                         | YLYRPLQSYG                                | .....                  | 371                 |       |     |
| 6VSBB | .....                                         | YLYRNLKPFFERDISTEIIY                      | NC                     | .....               | YFPLQ | 380 |
| 6VSBC | .....                                         | YLYRNLKPFFERDISTENC                       | .....                  | .....               | YFP   | 383 |

|       |             |                                                |                          |         |     |
|-------|-------------|------------------------------------------------|--------------------------|---------|-----|
| 6VSB  | GFQPTNG     | VGYQPYRVVLSFELLHAPATVCGPKKSTNLVKNKCVN          | 540                      |         |     |
| 6VSBA | ...         | FQPTVGYQPYRVVLSFELLHAPATVCGPKKSTNLVKNKCVN      | 413                      |         |     |
| 6VSBB | SYG         | FQPTVGYQPYRVVLSFELLHAPATVCGPKKSTNLVKNKCVN      | 425                      |         |     |
| 6VSBC | LQSYGFQ     | VGYQPYRVVLSFELLHAPATVCGPKKSTNLVKNKCVN          | 428                      |         |     |
| 6VSB  |             | FNFNGLTGTGVLTESNKKFLPFQGFGRDIADTTDAVRDPOTLEIL  | 585                      |         |     |
| 6VSBA |             | FNFNGLTGTGVLTESNKKFLPFQGFGRDIADTTDAVRDPOTLEIL  | 458                      |         |     |
| 6VSBB |             | FNFNGLTGTGVLTESNKKFLPFQGFGRDIADTTDAVRDPOTLEIL  | 470                      |         |     |
| 6VSBC |             | FNFNGLTGTGVLTESNKKFLPFQGFGRDIADTTDAVRDPOTLEIL  | 473                      |         |     |
| 6VSB  |             | DITPCSFGGVSVITPGTNTSNQVAVLYQDVNCTEV            | PVAIHADQLT               | 630     |     |
| 6VSBA |             | DITPCSFGGVSVITPGTNTSNQVAVLYQDVNCTEV            | SN.....                  | 495     |     |
| 6VSBB |             | DITPCSFGGVSVITPGTNTSNQVAVLYQDVNCTEV            | TGSN.....                | 509     |     |
| 6VSBC |             | DITPCSFGGVSVITPGTNTSNQVAVLYQDVNCTEV            | N.....                   | 509     |     |
| 6VSB  | PTRVYSTGSN  | VFQTRAGCLIGAEHVNNSYECDIPIGAGICA                | SYQ                      | 675     |     |
| 6VSBA | .....       | VFQTRAGCLIGAEHVNNSYECDIPIGAGICA                | .....                    | 526     |     |
| 6VSBB | .....       | VFQTRAGCLIGAEHVNNSYECDIPIGAGICA                | .....                    | 540     |     |
| 6VSBC | .....       | VFQTRAGCLIGAEHVNNSYECDIPIGAGICA                | .....                    | 540     |     |
| 6VSB  | TQTNSPGSASS | VASQSIIAYTMSLGAENSVAYSNNNSIAIPTNFTI            |                          | 720     |     |
| 6VSBA | .....       | VASQSIIAYTMSLGAENSVAYSNNNSIAIPTNFTI            |                          | 560     |     |
| 6VSBB | .....       | VASQSIIAYTMSLGAENSVAYSNNNSIAIPTNFTI            |                          | 574     |     |
| 6VSBC | .....       | VASQSIIAYTMSLGAENSVAYSNNNSIAIPTNFTI            |                          | 574     |     |
| 6VSB  |             | SVTTEILPVSMTKTSVDCTMYICGDSTEC SNLLLQYGSFCTQLNR |                          | 765     |     |
| 6VSBA |             | SVTTEILPVSMTKTSVDCTMYICGDSTEC SNLLLQYGSFCTQLNR |                          | 605     |     |
| 6VSBB |             | SVTTEILPVSMTKTSVDCTMYICGDSTEC SNLLLQYGSFCTQLNR |                          | 619     |     |
| 6VSBC |             | SVTTEILPVSMTKTSVDCTMYICGDSTEC SNLLLQYGSFCTQLNR |                          | 619     |     |
| 6VSB  |             | ALTGIAVEQDKNTQEVFAQVKQIYKTPPIKDFGGFNFSQILPDPS  |                          | 810     |     |
| 6VSBA |             | ALTGIAVEQDKNTQEVFAQVKQIYKTPPIKDFGGFNFSQILPDPS  |                          | 650     |     |
| 6VSBB |             | ALTGIAVEQDKNTQEVFAQVKQIYKTPPIKDFGGFNFSQILPDPS  |                          | 664     |     |
| 6VSBC |             | ALTGIAVEQDKNTQEVFAQVKQIYKTPPIKDFGGFNFSQILPDPS  |                          | 664     |     |
| 6VSB  | KPSK        | RSFIEDLLFN                                     | KVTLADAGFIKQYGDCLGDIAARD | LICAKKF | 855 |
| 6VSBA | K...        | RSFIEDLLFN                                     | .....                    | KVTLQKF | 668 |
| 6VSBB | K...        | RSFIEDLLFN                                     | .....                    | KVTLQKF | 682 |
| 6VSBC | K...        | RSFIEDLLFN                                     | .....                    | KVTLQKF | 682 |
| 6VSB  |             | NGLTVLPPLLTDemiaQYTSALLAGTITSGWTFGAGAALQIPFAM  |                          | 900     |     |
| 6VSBA |             | NGLTVLPPLLTDemiaQYTSALLAGTITSGWTFGAGAALQIPFAM  |                          | 713     |     |
| 6VSBB |             | NGLTVLPPLLTDemiaQYTSALLAGTITSGWTFGAGAALQIPFAM  |                          | 727     |     |
| 6VSBC |             | NGLTVLPPLLTDemiaQYTSALLAGTITSGWTFGAGAALQIPFAM  |                          | 727     |     |
| 6VSB  |             | QMAYRFNGIGVTQNVLYENQKLIANQFNSAIGKIQDLSLSTASAL  |                          | 945     |     |
| 6VSBA |             | QMAYRFNGIGVTQNVLYENQKLIANQFNSAIGKIQDLSLSTASAL  |                          | 758     |     |
| 6VSBB |             | QMAYRFNGIGVTQNVLYENQKLIANQFNSAIGKIQDLSLSTASAL  |                          | 772     |     |
| 6VSBC |             | QMAYRFNGIGVTQNVLYENQKLIANQFNSAIGKIQDLSLSTASAL  |                          | 772     |     |
| 6VSB  |             | GKLQDVVNQNAQALNTLVKQLSSNFGAISSVLNDILSRLDPPEAE  |                          | 990     |     |
| 6VSBA |             | GKLQDVVNQNAQALNTLVKQLSSNFGAISSVLNDILSRLDPPEAE  |                          | 803     |     |
| 6VSBB |             | GKLQDVVNQNAQALNTLVKQLSSNFGAISSVLNDILSRLDPPEAE  |                          | 817     |     |
| 6VSBC |             | GKLQDVVNQNAQALNTLVKQLSSNFGAISSVLNDILSRLDPPEAE  |                          | 817     |     |

|       |                                                                                                                |      |
|-------|----------------------------------------------------------------------------------------------------------------|------|
| 6VSB  | <span style="background-color: #0000FF; color: #0000FF;">VOIDRLITG</span> RLQSLQTYVTQQLIRAAEIRASANLAATKMSECVLG | 1035 |
| 6VSBA | <span style="background-color: #0000FF; color: #0000FF;">VOIDRLITG</span> .....                                | 812  |
| 6VSBB | <span style="background-color: #0000FF; color: #0000FF;">VOIDRLITG</span> .....                                | 826  |
| 6VSBC | <span style="background-color: #0000FF; color: #0000FF;">VOIDRLITG</span> .....                                | 826  |
|       |                                                                                                                |      |
| 6VSB  | QSKRVDFCGKGYHLMSFPQSAPHGVVFLHVTVPAQEKNFTTAPA                                                                   | 1080 |
| 6VSBA | .....                                                                                                          | 812  |
| 6VSBB | .....                                                                                                          | 826  |
| 6VSBC | .....                                                                                                          | 826  |
|       |                                                                                                                |      |
| 6VSB  | ICHDGKAHFPPREGVVFVSNNGTHWFVTQRNFYEPQIITTDNTFVSGN                                                               | 1125 |
| 6VSBA | .....                                                                                                          | 812  |
| 6VSBB | .....                                                                                                          | 826  |
| 6VSBC | .....                                                                                                          | 826  |
|       |                                                                                                                |      |
| 6VSB  | CDVVIGIVNNTVYDPLQPELDSFKEELDKYFKNHTSPDVDLGDIS                                                                  | 1170 |
| 6VSBA | .....                                                                                                          | 812  |
| 6VSBB | .....                                                                                                          | 826  |
| 6VSBC | .....                                                                                                          | 826  |
|       |                                                                                                                |      |
| 6VSB  | GINASVVNIQKEIDRLNEVAKNLNESLIDLQELGKYEQGSYIPE                                                                   | 1215 |
| 6VSBA | .....                                                                                                          | 812  |
| 6VSBB | .....                                                                                                          | 826  |
| 6VSBC | .....                                                                                                          | 826  |
|       |                                                                                                                |      |
| 6VSB  | APRDGQAYVRKDGWVLLSTFLGRSLEVLVLFQGPGRHHHHHHHSAW                                                                 | 1260 |
| 6VSBA | .....                                                                                                          | 812  |
| 6VSBB | .....                                                                                                          | 826  |
| 6VSBC | .....                                                                                                          | 826  |
|       |                                                                                                                |      |
| 6VSB  | SHPQFEKGGGSGGGGSGGSAWSHPQFEK                                                                                   | 1288 |
| 6VSBA | .....                                                                                                          | 812  |
| 6VSBB | .....                                                                                                          | 826  |
| 6VSBC | .....                                                                                                          | 826  |

  non conserved  
   $\geq 50\%$  conserved

**Figure 1.2** Alignment of amino acid sequences of 6VSB (experimental) and its three chains (A, B and C) in the structural model of 6VSB.

|        |                                          |                |     |
|--------|------------------------------------------|----------------|-----|
| QHD    | MVFVLVLLPLVSSQCVNLTTTRTQLPP              | AYTNSFTRGVYYPD | 40  |
| modelA | .....                                    | AYTNSFTRGVYYPD | 14  |
| modelB | .....                                    | AYTNSFTRGVYYPD | 14  |
| modelC | .....                                    | AYTNSFTRGVYYPD | 14  |
| QHD    | KVFRSSVLHSTQDLFLPFFSNVTWFHAIHVSGTNGTKRFD |                | 80  |
| modelA | KVFRSSVLHSTQDLFLPFFSNVTWFHAIHVSGTNGTKRFD |                | 54  |
| modelB | KVFRSSVLHSTQDLFLPFFSNVTWFHAIHVSGTNGTKRFD |                | 54  |
| modelC | KVFRSSVLHSTQDLFLPFFSNVTWFHAIHVSGTNGTKRFD |                | 54  |
| QHD    | NPVLPFNDGVYFASTEKSNIIRGWIFGTTLDSKTQSLLIV |                | 120 |
| modelA | NPVLPFNDGVYFASTEKSNIIRGWIFGTTLDSKTQSLLIV |                | 94  |
| modelB | NPVLPFNDGVYFASTEKSNIIRGWIFGTTLDSKTQSLLIV |                | 94  |
| modelC | NPVLPFNDGVYFASTEKSNIIRGWIFGTTLDSKTQSLLIV |                | 94  |
| QHD    | NNATNVVIKVCEFQFCNDPFLGVYYHKNNKSWMESEFRVY |                | 160 |
| modelA | NNATNVVIKVCEFQFCNDPFLGVYYHKNNKSWMESEFRVY |                | 134 |
| modelB | NNATNVVIKVCEFQFCNDPFLGVYYHKNNKSWMESEFRVY |                | 134 |
| modelC | NNATNVVIKVCEFQFCNDPFLGVYYHKNNKSWMESEFRVY |                | 134 |
| QHD    | SSANNCTFEYVSQPFLMDLEGKQGNFKNLREFVFKNIDGY |                | 200 |
| modelA | SSANNCTFEYVSQPFLMDLEGKQGNFKNLREFVFKNIDGY |                | 174 |
| modelB | SSANNCTFEYVSQPFLMDLEGKQGNFKNLREFVFKNIDGY |                | 174 |
| modelC | SSANNCTFEYVSQPFLMDLEGKQGNFKNLREFVFKNIDGY |                | 174 |
| QHD    | FKIYSKHTPINLVRDLPQGFSALEPLVDLPIGINITRFOT |                | 240 |
| modelA | FKIYSKHTPINLVRDLPQGFSALEPLVDLPIGINITRFOT |                | 214 |
| modelB | FKIYSKHTPINLVRDLPQGFSALEPLVDLPIGINITRFOT |                | 214 |
| modelC | FKIYSKHTPINLVRDLPQGFSALEPLVDLPIGINITRFOT |                | 214 |
| QHD    | LLALHRSYLTPGDSSSGWTAGAAAYVGYLQPRTFLLKYN  |                | 280 |
| modelA | LLALHRSYLTPGDSSSGWTAGAAAYVGYLQPRTFLLKYN  |                | 254 |
| modelB | LLALHRSYLTPGDSSSGWTAGAAAYVGYLQPRTFLLKYN  |                | 254 |
| modelC | LLALHRSYLTPGDSSSGWTAGAAAYVGYLQPRTFLLKYN  |                | 254 |
| QHD    | ENGTITDAVDCALDPLSETKCTLKSFTVEKGIYQTSNFRV |                | 320 |
| modelA | ENGTITDAVDCALDPLSETKCTLKSFTVEKGIYQTSNFRV |                | 294 |
| modelB | ENGTITDAVDCALDPLSETKCTLKSFTVEKGIYQTSNFRV |                | 294 |
| modelC | ENGTITDAVDCALDPLSETKCTLKSFTVEKGIYQTSNFRV |                | 294 |
| QHD    | QPTESIVRFPNITNLCPFGEVFNATRFASVYAWNRKRISN |                | 360 |
| modelA | QPTESIVRFPNITNLCPFGEVFNATRFASVYAWNRKRISN |                | 334 |
| modelB | QPTESIVRFPNITNLCPFGEVFNATRFASVYAWNRKRISN |                | 334 |
| modelC | QPTESIVRFPNITNLCPFGEVFNATRFASVYAWNRKRISN |                | 334 |
| QHD    | CVADYSVLYNSASFSTFKCYGVSPTKLNDLCFTNVYADSF |                | 400 |
| modelA | CVADYSVLYNSASFSTFKCYGVSPTKLNDLCFTNVYADSF |                | 374 |
| modelB | CVADYSVLYNSASFSTFKCYGVSPTKLNDLCFTNVYADSF |                | 374 |
| modelC | CVADYSVLYNSASFSTFKCYGVSPTKLNDLCFTNVYADSF |                | 374 |
| QHD    | VIRGDEVROIAPGQTGKIADYNYKLPDDFTGCVIAWNSNN |                | 440 |
| modelA | VIRGDEVROIAPGQTGKIADYNYKLPDDFTGCVIAWNSNN |                | 414 |
| modelB | VIRGDEVROIAPGQTGKIADYNYKLPDDFTGCVIAWNSNN |                | 414 |
| modelC | VIRGDEVROIAPGQTGKIADYNYKLPDDFTGCVIAWNSNN |                | 414 |

|        |                                           |     |
|--------|-------------------------------------------|-----|
| QHD    | LDSKVGGNYYLYRLFRKSNLKPFFERDISTEIQAGSTPC   | 480 |
| modelA | LDSKVGGNYYLYRLFRKSNLKPFFERDISTEIQAGSTPC   | 454 |
| modelB | LDSKVGGNYYLYRLFRKSNLKPFFERDISTEIQAGSTPC   | 454 |
| modelC | LDSKVGGNYYLYRLFRKSNLKPFFERDISTEIQAGSTPC   | 454 |
| QHD    | NGVEGFNCYFPLQSYGFQPTNGVGYQPYRVVLSFELLHA   | 520 |
| modelA | NGVEGFNCYFPLQSYGFQPTNGVGYQPYRVVLSFELLHA   | 494 |
| modelB | NGVEGFNCYFPLQSYGFQPTNGVGYQPYRVVLSFELLHA   | 494 |
| modelC | NGVEGFNCYFPLQSYGFQPTNGVGYQPYRVVLSFELLHA   | 494 |
| QHD    | PATVCGPKKSTNLVKNKCVNFFNGLTGTGVLTESNKKFL   | 560 |
| modelA | PATVCGPKKSTNLVKNKCVNFFNGLTGTGVLTESNKKFL   | 534 |
| modelB | PATVCGPKKSTNLVKNKCVNFFNGLTGTGVLTESNKKFL   | 534 |
| modelC | PATVCGPKKSTNLVKNKCVNFFNGLTGTGVLTESNKKFL   | 534 |
| QHD    | PFQQFGRDIADTTDAVRDPQMLEILDITPCSFGGVSVITP  | 600 |
| modelA | PFQQFGRDIADTTDAVRDPQMLEILDITPCSFGGVSVITP  | 574 |
| modelB | PFQQFGRDIADTTDAVRDPQMLEILDITPCSFGGVSVITP  | 574 |
| modelC | PFQQFGRDIADTTDAVRDPQMLEILDITPCSFGGVSVITP  | 574 |
| QHD    | GTNTSNQVAVLYQDVNCTEVPVAIHADQLTPTWRVYSTGS  | 640 |
| modelA | GTNTSNQVAVLYQDVNCTEVPVAIHADQLTPTWRVYSTGS  | 614 |
| modelB | GTNTSNQVAVLYQDVNCTEVPVAIHADQLTPTWRVYSTGS  | 614 |
| modelC | GTNTSNQVAVLYQDVNCTEVPVAIHADQLTPTWRVYSTGS  | 614 |
| QHD    | NVFQTRAGCLIGAEHVNNSYECDIPIGAGICASYQTQNS   | 680 |
| modelA | NVFQTRAGCLIGAEHVNNSYECDIPIGAGICASYQTQNS   | 654 |
| modelB | NVFQTRAGCLIGAEHVNNSYECDIPIGAGICASYQTQNS   | 654 |
| modelC | NVFQTRAGCLIGAEHVNNSYECDIPIGAGICASYQTQNS   | 654 |
| QHD    | PRRARSVASQSIIAYTMSLGAENSVAYSNNSIAIPTNFTI  | 720 |
| modelA | PRRARSVASQSIIAYTMSLGAENSVAYSNNSIAIPTNFTI  | 694 |
| modelB | PRRARSVASQSIIAYTMSLGAENSVAYSNNSIAIPTNFTI  | 694 |
| modelC | PRRARSVASQSIIAYTMSLGAENSVAYSNNSIAIPTNFTI  | 694 |
| QHD    | SVTTEILPVSMTKTSVDCTMYICGDSTEC SNLLLQYGSFC | 760 |
| modelA | SVTTEILPVSMTKTSVDCTMYICGDSTEC SNLLLQYGSFC | 734 |
| modelB | SVTTEILPVSMTKTSVDCTMYICGDSTEC SNLLLQYGSFC | 734 |
| modelC | SVTTEILPVSMTKTSVDCTMYICGDSTEC SNLLLQYGSFC | 734 |
| QHD    | TQLNRALTGIAVEQDKNTOEVFAQVKQIYKTPPIKDFGGF  | 800 |
| modelA | TQLNRALTGIAVEQDKNTOEVFAQVKQIYKTPPIKDFGGF  | 774 |
| modelB | TQLNRALTGIAVEQDKNTOEVFAQVKQIYKTPPIKDFGGF  | 774 |
| modelC | TQLNRALTGIAVEQDKNTOEVFAQVKQIYKTPPIKDFGGF  | 774 |
| QHD    | NFSQILPDPSKPSKRSFIEDLLFNKVTLADAGFIKQYGDC  | 840 |
| modelA | NFSQILPDPSKPSKRSFIEDLLFNKVTLADAGFIKQYGDC  | 814 |
| modelB | NFSQILPDPSKPSKRSFIEDLLFNKVTLADAGFIKQYGDC  | 814 |
| modelC | NFSQILPDPSKPSKRSFIEDLLFNKVTLADAGFIKQYGDC  | 814 |
| QHD    | LGDIAARDLICAQKFNGLTVLPPLLTDEMIAQYTSALLAG  | 880 |
| modelA | LGDIAARDLICAQKFNGLTVLPPLLTDEMIAQYTSALLAG  | 854 |
| modelB | LGDIAARDLICAQKFNGLTVLPPLLTDEMIAQYTSALLAG  | 854 |
| modelC | LGDIAARDLICAQKFNGLTVLPPLLTDEMIAQYTSALLAG  | 854 |



|        |                                            |      |
|--------|--------------------------------------------|------|
| QHD    | TITSGWTFGAGAALQIPFAMQMAYRFNGIGVTQNVLYENQ   | 920  |
| modelA | TITSGWTFGAGAALQIPFAMQMAYRFNGIGVTQNVLYENQ   | 894  |
| modelB | TITSGWTFGAGAALQIPFAMQMAYRFNGIGVTQNVLYENQ   | 894  |
| modelC | TITSGWTFGAGAALQIPFAMQMAYRFNGIGVTQNVLYENQ   | 894  |
| QHD    | KLIANQFNNSAIGKIQDSLSTASALGKLDVNVNQAQALN    | 960  |
| modelA | KLIANQFNNSAIGKIQDSLSTASALGKLDVNVNQAQALN    | 934  |
| modelB | KLIANQFNNSAIGKIQDSLSTASALGKLDVNVNQAQALN    | 934  |
| modelC | KLIANQFNNSAIGKIQDSLSTASALGKLDVNVNQAQALN    | 934  |
| QHD    | TLVKQLSSNFGAISSVLNDILSRLDKVEAEVQIDRLITGR   | 1000 |
| modelA | TLVKQLSSNFGAISSVLNDILSRLDKVEAEVQIDRLITG.   | 973  |
| modelB | TLVKQLSSNFGAISSVLNDILSRLDKVEAEVQIDRLITG.   | 973  |
| modelC | TLVKQLSSNFGAISSVLNDILSRLDKVEAEVQIDRLITG.   | 973  |
| QHD    | LQSLQTYVTQQLIRAAEIRASANLAATKMSECVLGQSKRV   | 1040 |
| modelA | .....                                      | 973  |
| modelB | .....                                      | 973  |
| modelC | .....                                      | 973  |
| QHD    | DFCGKGYHLMSEFPQSAPHGVVFLHVTVYVPAQEKNFTTAPA | 1080 |
| modelA | .....                                      | 973  |
| modelB | .....                                      | 973  |
| modelC | .....                                      | 973  |
| QHD    | ICHGDKAHFPREGVVFVSNGTHWFVTQRNFYEPQIITTDNT  | 1120 |
| modelA | .....                                      | 973  |
| modelB | .....                                      | 973  |
| modelC | .....                                      | 973  |
| QHD    | FVSGNCDVVIGIVNNTVYDPLQPELDSFKEELDKYFKNHT   | 1160 |
| modelA | .....                                      | 973  |
| modelB | .....                                      | 973  |
| modelC | .....                                      | 973  |
| QHD    | SPDVDLGDISGINASVVNIQKEIDRLNEVAKNLNESLIDL   | 1200 |
| modelA | .....                                      | 973  |
| modelB | .....                                      | 973  |
| modelC | .....                                      | 973  |
| QHD    | QELGKYEQYIKWPWYIWLGFIAGLIAIVMVTIMLCCMTSC   | 1240 |
| modelA | .....                                      | 973  |
| modelB | .....                                      | 973  |
| modelC | .....                                      | 973  |
| QHD    | CSCCLKGCCSCGSCCKFDEDDSEPVLKGVKLHYT         | 1273 |
| modelA | .....                                      | 973  |
| modelB | .....                                      | 973  |
| modelC | .....                                      | 973  |

non conserved

$\geq 50\%$  conserved

**Figure 1.3** Alignment of amino acid sequences of QHD43416.1 (QHD) and three chains (A, B and C) of the homology structural model (supplementary file **model.pdb**) of S protein of SARS-CoV-2.
