# Supplementary material
Source: PubMed Central journal article supplement (PMC7322478)
Supplement: mmc4.pdf [file mmc4.pdf]

# Delving Deep into the Structural Aspects of A Furin Cleavage Site Inserted into the Spike Protein of SARS-CoV-2: Supplementary materials

Wei Li \*

April 30, 2020

---

\*Institute of Special Environmental Medicine, Nantong University, No. 9, Seyuan Road, Nantong City, Jiangsu Province, Peoples Republic of China

## List of Tables

|   |                                                                    |    |
|---|--------------------------------------------------------------------|----|
| 1 | Salt bridging network analysis . . . . .                           | 7  |
| 2 | Counting of salt bridges . . . . .                                 | 9  |
| 3 | Side chain and main chain hydrogen bonding analysis . . . . .      | 27 |
| 4 | Side chain hydrogen bonding analysis . . . . .                     | 30 |
| 5 | Interfacial salt bridging network analysis . . . . .               | 31 |
| 6 | Counting of interfacial salt bridges . . . . .                     | 32 |
| 7 | MODE-specific salt bridging network analysis . . . . .             | 36 |
| 8 | MODE-specific interfacial salt bridging network analysis . . . . . | 37 |

## Supplementary materials

| PDB ID | Residue A  | Atom A | Residue B  | Atom B | Distance (Å) |
|--------|------------|--------|------------|--------|--------------|
| MODEL  | A_ARG_34   | NH1    | A_GLU_191  | OE2    | 2.674        |
| MODEL  | A_ARG_44   | NH1    | A_ASP_40   | OD1    | 2.695        |
| MODEL  | A_ARG_44   | NH1    | A_ASP_40   | OD2    | 3.232        |
| MODEL  | A_ARG_44   | NH2    | A_ASP_40   | OD1    | 3.625        |
| MODEL  | A_ARG_44   | NH2    | A_ASP_40   | OD2    | 2.635        |
| MODEL  | A_ARG_78   | NH1    | A_ASP_138  | OD2    | 2.688        |
| MODEL  | A_ARG_102  | NH1    | A_GLU_96   | OE1    | 3.329        |
| MODEL  | A_LYS_195  | NZ     | A_ASP_53   | OD1    | 2.683        |
| MODEL  | A_LYS_195  | NZ     | A_ASP_53   | OD2    | 2.722        |
| MODEL  | A_LYS_206  | NZ     | A_GLU_224  | OE1    | 2.749        |
| MODEL  | A_LYS_206  | NZ     | A_GLU_224  | OE2    | 2.697        |
| MODEL  | A_ARG_214  | NH1    | A_ASP_215  | OD1    | 2.721        |
| MODEL  | A_ARG_214  | NH1    | A_ASP_215  | OD2    | 3.669        |
| MODEL  | A_ARG_273  | NH2    | A_ASP_290  | OD1    | 2.616        |
| MODEL  | A_ARG_273  | NH2    | A_ASP_290  | OD2    | 3.058        |
| MODEL  | A_LYS_278  | NZ     | A_ASP_287  | OD2    | 3.755        |
| MODEL  | A_LYS_310  | NZ     | A_ASP_663  | OD1    | 2.628        |
| MODEL  | A_LYS_310  | NZ     | A_ASP_663  | OD2    | 2.667        |
| MODEL  | A_ARG_319  | NH1    | B_ASP_737  | OD2    | 2.735        |
| MODEL  | A_ARG_319  | NH1    | B_ASP_745  | OD1    | 3.587        |
| MODEL  | A_ARG_319  | NH2    | B_ASP_737  | OD2    | 3.982        |
| MODEL  | A_ARG_328  | NH1    | A_ASP_578  | OD2    | 3.263        |
| MODEL  | A_ARG_328  | NH2    | A_ASP_578  | OD2    | 3.964        |
| MODEL  | A_ARG_355  | NH2    | A_ASP_398  | OD1    | 3.101        |
| MODEL  | A_ARG_355  | NH2    | A_ASP_398  | OD2    | 2.632        |
| MODEL  | A_LYS_356  | NZ     | A_GLU_340  | OE1    | 2.636        |
| MODEL  | A_ARG_403  | NH1    | A_GLU_406  | OE2    | 3.089        |
| MODEL  | A_LYS_458  | NZ     | A_GLU_471  | OE1    | 2.430        |
| MODEL  | A_ARG_466  | NH1    | A_ASP_467  | OD1    | 3.188        |
| MODEL  | A_ARG_466  | NH1    | A_ASP_467  | OD2    | 2.659        |
| MODEL  | A_ARG_509  | NH1    | A_ASP_442  | OD1    | 2.803        |
| MODEL  | A_ARG_509  | NH1    | A_ASP_442  | OD2    | 3.407        |
| MODEL  | A_LYS_537  | NZ     | A_GLU_324  | OE1    | 2.730        |
| MODEL  | A_LYS_537  | NZ     | A_GLU_324  | OE2    | 2.652        |
| MODEL  | A_LYS_557  | NZ     | A_ASP_568  | OD1    | 2.715        |
| MODEL  | A_LYS_557  | NZ     | A_ASP_568  | OD2    | 2.782        |
| MODEL  | A_LYS_557  | NZ     | A_ASP_574  | OD1    | 2.869        |
| MODEL  | A_LYS_557  | NZ     | A_ASP_574  | OD2    | 2.649        |
| MODEL  | A_ARG_567  | NH1    | A_ASP_571  | OD1    | 2.606        |
| MODEL  | A_ARG_567  | NH2    | A_ASP_571  | OD1    | 2.720        |
| MODEL  | A_LYS_733  | NZ     | A_ASP_775  | OD1    | 3.202        |
| MODEL  | A_LYS_733  | NZ     | A_ASP_775  | OD2    | 2.601        |
| MODEL  | A_LYS_790  | NZ     | C_GLU_702  | OE1    | 2.623        |
| MODEL  | A_LYS_790  | NZ     | C_GLU_702  | OE2    | 2.744        |
| MODEL  | A_LYS_811  | NZ     | A_ASP_820  | OD2    | 2.461        |
| MODEL  | A_ARG_815  | NH1    | A_ASP_820  | OD1    | 2.649        |
| MODEL  | A_LYS_986  | NZ     | A_GLU_748  | OE2    | 2.597        |
| MODEL  | A_ARG_995  | NH1    | B_ASP_994  | OD1    | 3.497        |
| MODEL  | A_ARG_995  | NH1    | B_ASP_994  | OD2    | 2.691        |
| MODEL  | A_ARG_995  | NH2    | B_ASP_994  | OD1    | 2.657        |
| MODEL  | A_ARG_995  | NH2    | B_ASP_994  | OD2    | 3.473        |
| MODEL  | A_ARG_1019 | NH1    | A_GLU_773  | OE1    | 2.777        |
| MODEL  | A_ARG_1019 | NH2    | A_GLU_780  | OE1    | 3.073        |
| MODEL  | A_ARG_1019 | NH2    | A_GLU_780  | OE2    | 3.823        |
| MODEL  | A_LYS_1028 | NZ     | A_GLU_725  | OE1    | 2.878        |
| MODEL  | A_LYS_1028 | NZ     | A_GLU_725  | OE2    | 2.589        |
| MODEL  | A_ARG_1039 | NH1    | A_GLU_1031 | OE1    | 2.697        |

|       |            |     |            |     |       |
|-------|------------|-----|------------|-----|-------|
| MODEL | A_ARG.1039 | NH1 | A_GLU.1031 | OE2 | 3.642 |
| MODEL | A_ARG.1039 | NH2 | B_GLU.1031 | OE1 | 3.621 |
| MODEL | A_ARG.1039 | NH2 | B_GLU.1031 | OE2 | 2.620 |
| MODEL | A_HIS.1064 | NE2 | A_GLU.725  | OE1 | 2.720 |
| MODEL | A_HIS.1083 | ND1 | A_ASP.1084 | OD1 | 3.726 |
| MODEL | A_HIS.1083 | NE2 | A_ASP.1084 | OD1 | 2.954 |
| MODEL | A_HIS.1083 | NE2 | A_ASP.1084 | OD2 | 3.064 |
| MODEL | A_LYS.1086 | NZ  | A_ASP.1084 | OD2 | 2.860 |
| MODEL | B_ARG.34   | NH1 | B_GLU.191  | OE2 | 2.594 |
| MODEL | B_ARG.78   | NH2 | B_ASP.80   | OD1 | 3.853 |
| MODEL | B_ARG.78   | NH2 | B_ASP.80   | OD2 | 3.115 |
| MODEL | B_LYS.195  | NZ  | B_ASP.53   | OD1 | 2.671 |
| MODEL | B_LYS.195  | NZ  | B_ASP.53   | OD2 | 2.656 |
| MODEL | B_LYS.206  | NZ  | B_GLU.224  | OE1 | 3.459 |
| MODEL | B_LYS.206  | NZ  | B_GLU.224  | OE2 | 2.611 |
| MODEL | B_ARG.273  | NH2 | B_ASP.290  | OD1 | 2.633 |
| MODEL | B_ARG.273  | NH2 | B_ASP.290  | OD2 | 3.259 |
| MODEL | B_LYS.278  | NZ  | B_ASP.287  | OD2 | 2.604 |
| MODEL | B_LYS.310  | NZ  | B_ASP.663  | OD1 | 2.691 |
| MODEL | B_LYS.310  | NZ  | B_ASP.663  | OD2 | 2.615 |
| MODEL | B_ARG.319  | NH1 | C_ASP.745  | OD1 | 2.606 |
| MODEL | B_ARG.319  | NH1 | C_ASP.745  | OD2 | 3.565 |
| MODEL | B_ARG.319  | NH2 | C_ASP.745  | OD1 | 3.325 |
| MODEL | B_ARG.319  | NH2 | C_ASP.745  | OD2 | 2.636 |
| MODEL | B_ARG.328  | NH1 | B_ASP.578  | OD2 | 3.286 |
| MODEL | B_ARG.328  | NH2 | B_ASP.578  | OD1 | 3.906 |
| MODEL | B_ARG.328  | NH2 | B_ASP.578  | OD2 | 2.659 |
| MODEL | B_ARG.355  | NH2 | B_ASP.398  | OD2 | 2.596 |
| MODEL | B_ARG.403  | NH1 | B_GLU.406  | OE2 | 2.630 |
| MODEL | B_ARG.403  | NH2 | B_GLU.406  | OE2 | 3.754 |
| MODEL | B_ARG.408  | NH1 | B_ASP.405  | OD1 | 2.895 |
| MODEL | B_ARG.408  | NH1 | B_ASP.405  | OD2 | 2.755 |
| MODEL | B_ARG.408  | NH2 | B_ASP.405  | OD2 | 3.887 |
| MODEL | B_ARG.454  | NH1 | B_ASP.467  | OD2 | 2.590 |
| MODEL | B_LYS.462  | NZ  | B_GLU.465  | OE2 | 3.504 |
| MODEL | B_ARG.509  | NH1 | B_ASP.442  | OD1 | 2.673 |
| MODEL | B_ARG.509  | NH1 | B_ASP.442  | OD2 | 3.881 |
| MODEL | B_LYS.528  | NZ  | B_ASP.389  | OD2 | 2.658 |
| MODEL | B_LYS.535  | NZ  | B_GLU.554  | OE2 | 2.577 |
| MODEL | B_LYS.537  | NZ  | B_GLU.324  | OE1 | 2.634 |
| MODEL | B_LYS.537  | NZ  | B_GLU.324  | OE2 | 2.706 |
| MODEL | B_LYS.557  | NZ  | B_ASP.586  | OD1 | 2.689 |
| MODEL | B_LYS.557  | NZ  | B_ASP.586  | OD2 | 2.627 |
| MODEL | B_ARG.567  | NH1 | B_ASP.571  | OD1 | 2.826 |
| MODEL | B_ARG.567  | NH1 | B_ASP.571  | OD2 | 2.786 |
| MODEL | B_ARG.567  | NH2 | B_ASP.571  | OD1 | 3.551 |
| MODEL | B_HIS.625  | ND1 | B_ASP.627  | OD2 | 3.516 |
| MODEL | B_HIS.625  | NE2 | B_ASP.627  | OD2 | 3.967 |
| MODEL | B_ARG.646  | NH1 | B_ASP.614  | OD2 | 2.839 |
| MODEL | B_LYS.733  | NZ  | B_ASP.775  | OD1 | 3.016 |
| MODEL | B_LYS.733  | NZ  | B_ASP.775  | OD2 | 2.582 |
| MODEL | B_LYS.776  | NZ  | B_GLU.780  | OE1 | 2.710 |
| MODEL | B_LYS.776  | NZ  | B_GLU.780  | OE2 | 2.672 |
| MODEL | B_LYS.790  | NZ  | A_GLU.702  | OE1 | 2.570 |
| MODEL | B_LYS.790  | NZ  | A_GLU.702  | OE2 | 3.570 |
| MODEL | B_ARG.815  | NH1 | B_ASP.820  | OD1 | 2.696 |
| MODEL | B_ARG.815  | NH2 | B_ASP.867  | OD1 | 2.920 |
| MODEL | B_ARG.815  | NH2 | B_GLU.868  | OE2 | 3.311 |

|       |            |     |            |     |       |
|-------|------------|-----|------------|-----|-------|
| MODEL | B_LYS_854  | NZ  | A_ASP_614  | OD1 | 3.487 |
| MODEL | B_ARG_983  | NH2 | B_ASP_979  | OD1 | 2.614 |
| MODEL | B_ARG_983  | NH2 | B_ASP_979  | OD2 | 3.538 |
| MODEL | B_LYS_986  | NZ  | C_ASP_427  | OD2 | 3.985 |
| MODEL | B_ARG_995  | NH1 | C_ASP_994  | OD1 | 2.636 |
| MODEL | B_ARG_995  | NH1 | C_ASP_994  | OD2 | 3.371 |
| MODEL | B_ARG_995  | NH2 | C_ASP_994  | OD1 | 3.182 |
| MODEL | B_ARG_995  | NH2 | C_ASP_994  | OD2 | 2.637 |
| MODEL | B_ARG_1019 | NH1 | B_GLU_773  | OE1 | 3.284 |
| MODEL | B_ARG_1019 | NH1 | B_GLU_773  | OE2 | 2.600 |
| MODEL | B_LYS_1028 | NZ  | B_GLU_725  | OE1 | 2.732 |
| MODEL | B_LYS_1028 | NZ  | B_GLU_725  | OE2 | 2.670 |
| MODEL | B_ARG_1039 | NH1 | B_GLU_1031 | OE1 | 2.669 |
| MODEL | B_ARG_1039 | NH1 | B_GLU_1031 | OE2 | 3.057 |
| MODEL | B_ARG_1039 | NH2 | C_GLU_1031 | OE1 | 2.711 |
| MODEL | B_ARG_1039 | NH2 | C_GLU_1031 | OE2 | 3.989 |
| MODEL | B_LYS_1045 | NZ  | B_ASP_1041 | OD1 | 2.637 |
| MODEL | B_HIS_1064 | NE2 | B_GLU_725  | OE2 | 2.768 |
| MODEL | B_LYS_1086 | NZ  | B_ASP_1084 | OD2 | 2.620 |
| MODEL | C_LYS_97   | NZ  | C_GLU_96   | OE2 | 2.761 |
| MODEL | C_LYS_97   | NZ  | C_ASP_253  | OD1 | 2.693 |
| MODEL | C_LYS_97   | NZ  | C_ASP_253  | OD2 | 2.866 |
| MODEL | C_LYS_113  | NZ  | B_GLU_471  | OE2 | 2.679 |
| MODEL | C_LYS_129  | NZ  | C_GLU_169  | OE1 | 2.582 |
| MODEL | C_LYS_129  | NZ  | C_GLU_169  | OE2 | 2.463 |
| MODEL | C_LYS_150  | NZ  | C_GLU_154  | OE1 | 2.608 |
| MODEL | C_LYS_150  | NZ  | C_GLU_154  | OE2 | 2.752 |
| MODEL | C_ARG_158  | NH2 | C_GLU_154  | OE2 | 3.189 |
| MODEL | C_LYS_187  | NZ  | C_GLU_180  | OE2 | 2.873 |
| MODEL | C_LYS_202  | NZ  | C_ASP_228  | OD2 | 2.762 |
| MODEL | C_ARG_246  | NH1 | C_GLU_156  | OE1 | 2.756 |
| MODEL | C_ARG_246  | NH1 | C_GLU_156  | OE2 | 3.170 |
| MODEL | C_ARG_246  | NH2 | C_GLU_156  | OE1 | 3.528 |
| MODEL | C_ARG_246  | NH2 | C_GLU_156  | OE2 | 2.612 |
| MODEL | C_ARG_273  | NH1 | C_ASP_290  | OD1 | 2.966 |
| MODEL | C_ARG_273  | NH1 | C_ASP_290  | OD2 | 3.840 |
| MODEL | C_ARG_273  | NH2 | C_ASP_290  | OD1 | 2.966 |
| MODEL | C_ARG_273  | NH2 | C_ASP_290  | OD2 | 2.552 |
| MODEL | C_LYS_310  | NZ  | C_ASP_663  | OD1 | 3.129 |
| MODEL | C_ARG_319  | NH1 | A_ASP_745  | OD1 | 3.819 |
| MODEL | C_ARG_328  | NH1 | C_ASP_578  | OD2 | 2.598 |
| MODEL | C_ARG_328  | NH2 | C_ASP_578  | OD1 | 3.708 |
| MODEL | C_ARG_328  | NH2 | C_ASP_578  | OD2 | 2.801 |
| MODEL | C_ARG_355  | NH2 | C_ASP_398  | OD1 | 3.407 |
| MODEL | C_ARG_355  | NH2 | C_ASP_398  | OD2 | 2.579 |
| MODEL | C_LYS_356  | NZ  | C_GLU_340  | OE1 | 2.568 |
| MODEL | C_ARG_403  | NH1 | C_GLU_406  | OE1 | 3.581 |
| MODEL | C_ARG_403  | NH1 | C_GLU_406  | OE2 | 2.672 |
| MODEL | C_ARG_403  | NH2 | C_GLU_406  | OE2 | 2.658 |
| MODEL | C_LYS_458  | NZ  | A_ASP_389  | OD2 | 3.696 |
| MODEL | C_LYS_462  | NZ  | C_GLU_465  | OE1 | 2.614 |
| MODEL | C_LYS_462  | NZ  | C_GLU_465  | OE2 | 2.647 |
| MODEL | C_ARG_509  | NH1 | C_ASP_442  | OD1 | 2.578 |
| MODEL | C_LYS_528  | NZ  | C_ASP_389  | OD1 | 3.189 |
| MODEL | C_LYS_528  | NZ  | C_ASP_389  | OD2 | 3.148 |
| MODEL | C_LYS_535  | NZ  | C_GLU_554  | OE1 | 2.654 |
| MODEL | C_LYS_535  | NZ  | C_GLU_554  | OE2 | 2.723 |
| MODEL | C_LYS_537  | NZ  | C_GLU_324  | OE2 | 2.535 |

|       |            |     |            |     |       |
|-------|------------|-----|------------|-----|-------|
| MODEL | C_LYS_557  | NZ  | C_ASP_568  | OD1 | 2.816 |
| MODEL | C_LYS_557  | NZ  | C_ASP_568  | OD2 | 2.819 |
| MODEL | C_LYS_557  | NZ  | C_ASP_574  | OD1 | 3.661 |
| MODEL | C_LYS_557  | NZ  | C_ASP_574  | OD2 | 2.584 |
| MODEL | C_ARG_567  | NH1 | C_ASP_571  | OD1 | 3.523 |
| MODEL | C_ARG_567  | NH1 | C_ASP_571  | OD2 | 2.610 |
| MODEL | C_ARG_567  | NH2 | C_ASP_571  | OD1 | 2.539 |
| MODEL | C_ARG_567  | NH2 | C_ASP_571  | OD2 | 3.300 |
| MODEL | C_ARG_646  | NH1 | A_ASP_848  | OD2 | 3.643 |
| MODEL | C_ARG_646  | NH2 | A_ASP_848  | OD1 | 3.695 |
| MODEL | C_ARG_646  | NH2 | A_ASP_848  | OD2 | 2.627 |
| MODEL | C_LYS_733  | NZ  | C_ASP_775  | OD1 | 3.066 |
| MODEL | C_LYS_733  | NZ  | C_ASP_775  | OD2 | 2.575 |
| MODEL | C_LYS_811  | NZ  | C_ASP_820  | OD2 | 3.817 |
| MODEL | C_ARG_815  | NH1 | C_ASP_820  | OD1 | 2.929 |
| MODEL | C_ARG_815  | NH1 | C_ASP_820  | OD2 | 2.916 |
| MODEL | C_ARG_815  | NH2 | C_ASP_820  | OD1 | 3.727 |
| MODEL | C_ARG_847  | NH1 | B_GLU_619  | OE1 | 3.034 |
| MODEL | C_LYS_854  | NZ  | B_ASP_614  | OD1 | 2.686 |
| MODEL | C_LYS_986  | NZ  | C_GLU_748  | OE1 | 2.531 |
| MODEL | C_ARG_995  | NH1 | A_ASP_994  | OD1 | 2.647 |
| MODEL | C_ARG_995  | NH1 | A_ASP_994  | OD2 | 3.498 |
| MODEL | C_ARG_995  | NH2 | A_ASP_994  | OD1 | 3.382 |
| MODEL | C_ARG_995  | NH2 | A_ASP_994  | OD2 | 2.636 |
| MODEL | C_ARG_1019 | NH1 | B_GLU_1017 | OE2 | 2.726 |
| MODEL | C_ARG_1019 | NH1 | C_GLU_773  | OE2 | 2.647 |
| MODEL | C_ARG_1019 | NH2 | B_GLU_1017 | OE2 | 3.415 |
| MODEL | C_LYS_1028 | NZ  | C_GLU_725  | OE1 | 2.678 |
| MODEL | C_LYS_1028 | NZ  | C_GLU_725  | OE2 | 2.787 |
| MODEL | C_ARG_1039 | NH1 | C_GLU_1031 | OE1 | 3.735 |
| MODEL | C_ARG_1039 | NH1 | C_GLU_1031 | OE2 | 2.669 |
| MODEL | C_ARG_1039 | NH2 | A_GLU_1031 | OE1 | 3.509 |
| MODEL | C_ARG_1039 | NH2 | A_GLU_1031 | OE2 | 2.596 |
| MODEL | C_HIS_1064 | NE2 | C_GLU_725  | OE1 | 2.774 |
| MODEL | C_LYS_1086 | NZ  | C_ASP_1084 | OD2 | 2.855 |

Table 1: Salt bridging networks within the PDB entries. In this table, the residue naming scheme is **Chain ID\_residue name\_residue number**.

| Count | Residue A | Residue B |
|-------|-----------|-----------|
| 12    | ARG995    | ASP994    |
| 12    | ARG1039   | GLU1031   |
| 9     | ARG567    | ASP571    |
| 8     | ARG328    | ASP578    |
| 8     | ARG273    | ASP290    |
| 6     | ARG403    | GLU406    |
| 6     | LYS733    | ASP775    |
| 6     | LYS1028   | GLU725    |
| 6     | ARG319    | ASP745    |
| 5     | LYS310    | ASP663    |
| 5     | ARG815    | ASP820    |
| 5     | ARG355    | ASP398    |
| 5     | ARG509    | ASP442    |
| 5     | LYS537    | GLU324    |
| 4     | LYS790    | GLU702    |
| 4     | LYS206    | GLU224    |
| 4     | ARG1019   | GLU773    |
| 4     | LYS557    | ASP568    |
| 4     | ARG246    | GLU156    |
| 4     | LYS557    | ASP574    |
| 4     | LYS195    | ASP53     |
| 4     | ARG44     | ASP40     |
| 3     | LYS1086   | ASP1084   |
| 3     | ARG408    | ASP405    |
| 3     | LYS528    | ASP389    |
| 3     | LYS462    | GLU465    |
| 3     | LYS535    | GLU554    |
| 3     | ARG646    | ASP848    |
| 3     | HIS1064   | GLU725    |
| 3     | HIS1083   | ASP1084   |
| 2     | ARG214    | ASP215    |
| 2     | ARG34     | GLU191    |
| 2     | ARG1019   | GLU780    |
| 2     | LYS150    | GLU154    |
| 2     | LYS811    | ASP820    |
| 2     | LYS854    | ASP614    |
| 2     | LYS986    | GLU748    |
| 2     | ARG466    | ASP467    |
| 2     | ARG319    | ASP737    |
| 2     | LYS278    | ASP287    |
| 2     | LYS557    | ASP586    |
| 2     | LYS97     | ASP253    |
| 2     | HIS625    | ASP627    |
| 2     | ARG1019   | GLU1017   |
| 2     | ARG78     | ASP80     |
| 2     | LYS356    | GLU340    |
| 2     | LYS129    | GLU169    |
| 2     | LYS776    | GLU780    |
| 2     | ARG983    | ASP979    |
| 1     | ARG78     | ASP138    |
| 1     | ARG102    | GLU96     |
| 1     | ARG158    | GLU154    |
| 1     | LYS458    | ASP389    |
| 1     | LYS187    | GLU180    |
| 1     | ARG815    | GLU868    |
| 1     | ARG646    | ASP614    |
| 1     | LYS202    | ASP228    |



|   |         |         |
|---|---------|---------|
| 1 | LYS458  | GLU471  |
| 1 | ARG454  | ASP467  |
| 1 | LYS986  | ASP427  |
| 1 | LYS97   | GLU96   |
| 1 | ARG815  | ASP867  |
| 1 | LYS113  | GLU471  |
| 1 | ARG847  | GLU619  |
| 1 | LYS1045 | ASP1041 |

Table 2: Counting of salt bridges within the PDB entries in Table 1.

| PDB       | Acceptor (A)   | Donor (D)      | Hydrogen (H)    | D-A (Å) | H-A (Å) | $\angle ADH(^{\circ})$ |
|-----------|----------------|----------------|-----------------|---------|---------|------------------------|
| MODEL.PDB | O, A.VAL.62    | N, A.THR.29    | H, A.THR.29     | 2.95    | 2.12    | 28.08                  |
| MODEL.PDB | O, A.SER.60    | N, A.SER.31    | H, A.SER.31     | 2.90    | 1.91    | 7.61                   |
| MODEL.PDB | O, A.PRO.217   | NE, A.ARG.34   | HE, A.ARG.34    | 2.69    | 1.82    | 24.55                  |
| MODEL.PDB | OE2, A.GLU.191 | NH1, A.ARG.34  | HH11, A.ARG.34  | 2.67    | 1.78    | 22.19                  |
| MODEL.PDB | O, C.PHE.562   | NZ, A.LYS.41   | HZ1, A.LYS.41   | 2.82    | 1.90    | 19.31                  |
| MODEL.PDB | O, C.PHE.565   | N, A.PHE.43    | H, A.PHE.43     | 2.86    | 1.91    | 16.15                  |
| MODEL.PDB | OD1, A.ASP.40  | NH1, A.ARG.44  | HH12, A.ARG.44  | 2.70    | 1.70    | 6.73                   |
| MODEL.PDB | OD2, A.ASP.40  | NH2, A.ARG.44  | HH22, A.ARG.44  | 2.63    | 1.66    | 12.76                  |
| MODEL.PDB | O, A.PHE.275   | N, A.THR.51    | H, A.THR.51     | 2.92    | 1.93    | 8.57                   |
| MODEL.PDB | OD1, A.ASP.53  | N, A.LEU.54    | H, A.LEU.54     | 2.69    | 1.75    | 17.28                  |
| MODEL.PDB | O, A.GLN.271   | N, A.PHE.55    | H, A.PHE.55     | 2.89    | 1.93    | 14.85                  |
| MODEL.PDB | O, A.SER.31    | N, A.PHE.59    | H, A.PHE.59     | 2.79    | 1.91    | 23.18                  |
| MODEL.PDB | OG, A.SER.31   | N, A.SER.60    | H, A.SER.60     | 2.95    | 2.05    | 22.69                  |
| MODEL.PDB | O, A.PRO.57    | OG, A.SER.60   | HG, A.SER.60    | 2.69    | 1.88    | 25.91                  |
| MODEL.PDB | O, A.THR.29    | N, A.VAL.62    | H, A.VAL.62     | 2.85    | 1.86    | 7.63                   |
| MODEL.PDB | O, A.VAL.267   | N, A.THR.63    | H, A.THR.63     | 2.96    | 2.07    | 22.96                  |
| MODEL.PDB | O, A.TYR.265   | N, A.PHE.65    | H, A.PHE.65     | 2.90    | 1.90    | 8.15                   |
| MODEL.PDB | O, A.THR.76    | N, A.GLY.72    | H, A.GLY.72     | 2.98    | 2.04    | 17.50                  |
| MODEL.PDB | OD2, A.ASP.138 | NH1, A.ARG.78  | HH11, A.ARG.78  | 2.69    | 1.82    | 24.44                  |
| MODEL.PDB | O, A.PHE.238   | N, A.LEU.84    | H, A.LEU.84     | 2.88    | 1.90    | 12.05                  |
| MODEL.PDB | O, A.THR.236   | N, A.PHE.86    | H, A.PHE.86     | 2.97    | 2.03    | 17.03                  |
| MODEL.PDB | O, A.PHE.194   | N, A.VAL.90    | H, A.VAL.90     | 2.96    | 2.00    | 13.46                  |
| MODEL.PDB | O, A.GLY.268   | N, A.TYR.91    | H, A.TYR.91     | 2.82    | 1.91    | 20.75                  |
| MODEL.PDB | OE1, A.GLU.191 | OH, A.TYR.91   | HH, A.TYR.91    | 2.70    | 1.78    | 13.73                  |
| MODEL.PDB | O, A.PHE.192   | N, A.PHE.92    | H, A.PHE.92     | 2.81    | 1.81    | 6.16                   |
| MODEL.PDB | O, A.TYR.266   | N, A.ALA.93    | H, A.ALA.93     | 2.95    | 1.97    | 12.98                  |
| MODEL.PDB | O, A.ALA.264   | OG, A.SER.94   | HG, A.SER.94    | 2.80    | 1.88    | 13.90                  |
| MODEL.PDB | O, A.GLU.96    | N, A.ASN.99    | H, A.ASN.99     | 2.80    | 1.94    | 25.08                  |
| MODEL.PDB | O, A.LEU.241   | N, A.ARG.102   | H, A.ARG.102    | 2.91    | 1.99    | 20.77                  |
| MODEL.PDB | O, A.ILE.119   | N, A.TRP.104   | H, A.TRP.104    | 2.92    | 1.96    | 15.26                  |
| MODEL.PDB | O, A.GLN.239   | N, A.ILE.105   | H, A.ILE.105    | 2.83    | 1.82    | 3.74                   |
| MODEL.PDB | OD1, A.ASP.111 | N, A.SER.112   | H, A.SER.112    | 2.90    | 2.03    | 25.00                  |
| MODEL.PDB | O, A.ASP.111   | N, A.LYS.113   | H, A.LYS.113    | 2.76    | 1.81    | 15.43                  |
| MODEL.PDB | OE1, A.GLU.132 | N, A.GLN.115   | H, A.GLN.115    | 2.79    | 1.92    | 24.34                  |
| MODEL.PDB | O, A.PHE.106   | N, A.LEU.117   | H, A.LEU.117    | 2.77    | 1.82    | 16.07                  |
| MODEL.PDB | O, A.TRP.104   | N, A.ILE.119   | H, A.ILE.119    | 2.95    | 2.01    | 18.10                  |
| MODEL.PDB | O, A.VAL.127   | N, A.VAL.120   | H, A.VAL.120    | 2.94    | 1.93    | 5.02                   |
| MODEL.PDB | O, A.ARG.102   | N, A.ASN.121   | H, A.ASN.121    | 2.84    | 1.83    | 3.77                   |
| MODEL.PDB | OD1, A.ASN.122 | N, A.ASN.125   | H, A.ASN.125    | 2.92    | 1.95    | 12.42                  |
| MODEL.PDB | O, A.SER.172   | N, A.VAL.126   | H, A.VAL.126    | 2.85    | 1.93    | 20.11                  |
| MODEL.PDB | O, A.VAL.120   | N, A.VAL.127   | H, A.VAL.127    | 2.83    | 1.82    | 5.12                   |
| MODEL.PDB | O, A.TYR.170   | N, A.ILE.128   | H, A.ILE.128    | 2.90    | 1.91    | 10.23                  |
| MODEL.PDB | O, A.ASN.164   | N, A.GLU.132   | H, A.GLU.132    | 2.83    | 1.85    | 11.69                  |
| MODEL.PDB | OD1, A.ASP.111 | N, A.PHE.135   | H, A.PHE.135    | 2.92    | 2.01    | 20.87                  |
| MODEL.PDB | O, A.GLU.156   | N, A.GLY.142   | H, A.GLY.142    | 2.74    | 1.80    | 16.62                  |
| MODEL.PDB | OD1, A.ASN.149 | N, A.LYS.150   | H, A.LYS.150    | 2.72    | 1.74    | 12.62                  |
| MODEL.PDB | O, A.LYS.150   | N, A.MET.153   | H, A.MET.153    | 2.92    | 2.00    | 19.68                  |
| MODEL.PDB | O, A.SER.155   | N, A.PHE.157   | H, A.PHE.157    | 2.94    | 2.05    | 22.37                  |
| MODEL.PDB | O, A.GLN.134   | OG, A.SER.161  | HG, A.SER.161   | 2.70    | 1.75    | 5.85                   |
| MODEL.PDB | O, A.GLU.132   | OG, A.SER.162  | HG, A.SER.162   | 2.74    | 1.92    | 25.70                  |
| MODEL.PDB | OE1, A.GLU.169 | N, A.PHE.168   | H, A.PHE.168    | 2.88    | 1.96    | 19.77                  |
| MODEL.PDB | OD1, A.ASP.178 | N, A.GLU.180   | H, A.GLU.180    | 2.81    | 1.87    | 16.86                  |
| MODEL.PDB | O, A.ASP.178   | ND2, A.ASN.188 | HD21, A.ASN.188 | 2.73    | 1.81    | 19.79                  |
| MODEL.PDB | O, A.THR.208   | N, A.LEU.189   | H, A.LEU.189    | 2.72    | 1.73    | 10.06                  |
| MODEL.PDB | O, A.SER.94    | N, A.ARG.190   | H, A.ARG.190    | 2.99    | 1.98    | 2.82                   |
| MODEL.PDB | O, A.LYS.206   | N, A.GLU.191   | H, A.GLU.191    | 2.92    | 1.91    | 3.51                   |
| MODEL.PDB | O, A.PHE.92    | N, A.PHE.192   | H, A.PHE.192    | 2.77    | 1.81    | 14.78                  |

|           |                |                |                 |      |      |       |
|-----------|----------------|----------------|-----------------|------|------|-------|
| MODEL.PDB | O, A_TYR_204   | N, A_VAL_193   | H, A_VAL_193    | 2.82 | 1.83 | 8.26  |
| MODEL.PDB | O, A_VAL_90    | N, A_PHE_194   | H, A_PHE_194    | 2.94 | 1.94 | 7.39  |
| MODEL.PDB | OH, A_TYR_37   | NZ, A_LYS_195  | HZ2, A_LYS_195  | 2.76 | 1.80 | 13.93 |
| MODEL.PDB | O, A_ILE_233   | ND2, A_ASN_196 | HD22, A_ASN_196 | 2.94 | 1.97 | 13.74 |
| MODEL.PDB | O, A_TYR_200   | N, A_ILE_197   | H, A_ILE_197    | 2.86 | 1.86 | 6.00  |
| MODEL.PDB | O, A_ILE_197   | N, A_TYR_200   | H, A_TYR_200    | 2.74 | 1.79 | 15.00 |
| MODEL.PDB | OE2, C_GLU_516 | OH, A_TYR_200  | HH, A_TYR_200   | 2.56 | 1.75 | 25.87 |
| MODEL.PDB | O, A_LEU_229   | N, A_PHE_201   | H, A_PHE_201    | 2.78 | 1.81 | 12.01 |
| MODEL.PDB | O, A_LYS_195   | N, A_LYS_202   | H, A_LYS_202    | 2.92 | 1.99 | 18.19 |
| MODEL.PDB | O, A_VAL_193   | N, A_TYR_204   | H, A_TYR_204    | 2.86 | 1.89 | 13.20 |
| MODEL.PDB | O, A_GLU_224   | N, A_SER_205   | H, A_SER_205    | 2.85 | 1.87 | 12.48 |
| MODEL.PDB | O, A_GLU_191   | N, A_LYS_206   | H, A_LYS_206    | 2.90 | 1.94 | 15.36 |
| MODEL.PDB | OE2, A_GLU_224 | NZ, A_LYS_206  | HZ3, A_LYS_206  | 2.70 | 1.79 | 20.97 |
| MODEL.PDB | O, A_LEU_189   | N, A_THR_208   | H, A_THR_208    | 2.79 | 1.81 | 9.89  |
| MODEL.PDB | OD1, A_ASP_215 | NE, A_ARG_214  | HE, A_ARG_214   | 2.96 | 2.08 | 24.64 |
| MODEL.PDB | OD1, A_ASP_215 | NH1, A_ARG_214 | HH11, A_ARG_214 | 2.72 | 1.80 | 19.02 |
| MODEL.PDB | OE2, A_GLU_191 | OG, A_SER_221  | HG, A_SER_221   | 2.68 | 1.80 | 18.27 |
| MODEL.PDB | O, A_ILE_203   | N, A_LEU_226   | H, A_LEU_226    | 2.83 | 1.83 | 4.53  |
| MODEL.PDB | O, A_GLY_199   | N, A_ILE_231   | H, A_ILE_231    | 2.83 | 1.85 | 11.58 |
| MODEL.PDB | O, A_GLY_199   | N, A_GLY_232   | H, A_GLY_232    | 2.86 | 1.87 | 10.07 |
| MODEL.PDB | O, A_LEU_84    | N, A_PHE_238   | H, A_PHE_238    | 2.85 | 1.85 | 8.44  |
| MODEL.PDB | O, A_ILE_105   | N, A_GLN_239   | H, A_GLN_239    | 2.91 | 1.97 | 16.96 |
| MODEL.PDB | O, A_ASN_81    | NE2, A_GLN_239 | HE21, A_GLN_239 | 2.98 | 2.13 | 26.80 |
| MODEL.PDB | O, A_GLY_103   | N, A_LEU_241   | H, A_LEU_241    | 2.77 | 1.79 | 10.99 |
| MODEL.PDB | O, A_LEU_141   | N, A_LEU_244   | H, A_LEU_244    | 2.88 | 1.94 | 17.90 |
| MODEL.PDB | O, A_GLY_75    | NH2, A_ARG_246 | HH22, A_ARG_246 | 2.87 | 2.00 | 25.70 |
| MODEL.PDB | O, A_SER_247   | OG1, A_THR_250 | HG1, A_THR_250  | 2.77 | 1.95 | 25.64 |
| MODEL.PDB | OG, A_SER_255  | N, A_GLY_252   | H, A_GLY_252    | 2.92 | 1.98 | 17.69 |
| MODEL.PDB | O, A_PHE_65    | N, A_TYR_265   | H, A_TYR_265    | 2.93 | 1.95 | 10.39 |
| MODEL.PDB | O, A_ALA_93    | N, A_TYR_266   | H, A_TYR_266    | 2.74 | 1.76 | 10.55 |
| MODEL.PDB | O, A_THR_63    | N, A_VAL_267   | H, A_VAL_267    | 2.85 | 1.85 | 6.97  |
| MODEL.PDB | O, A_TYR_91    | N, A_GLY_268   | H, A_GLY_268    | 2.83 | 1.82 | 2.64  |
| MODEL.PDB | O, A_GLY_89    | N, A_LEU_270   | H, A_LEU_270    | 2.99 | 2.01 | 10.68 |
| MODEL.PDB | O, A_PHE_55    | N, A_GLN_271   | H, A_GLN_271    | 2.81 | 1.85 | 14.88 |
| MODEL.PDB | O, A_GLN_271   | N, A_ARG_273   | H, A_ARG_273    | 2.86 | 2.02 | 27.75 |
| MODEL.PDB | OD1, A_ASP_290 | NH2, A_ARG_273 | HH21, A_ARG_273 | 2.62 | 1.69 | 18.86 |
| MODEL.PDB | O, A_THR_51    | N, A_PHE_275   | H, A_PHE_275    | 2.91 | 1.94 | 13.07 |
| MODEL.PDB | O, A_VAL_289   | N, A_LEU_276   | H, A_LEU_276    | 2.98 | 1.99 | 8.88  |
| MODEL.PDB | O, A_HIS_49    | N, A_LEU_277   | H, A_LEU_277    | 2.78 | 1.78 | 1.92  |
| MODEL.PDB | O, A_VAL_47    | N, A_TYR_279   | H, A_TYR_279    | 2.95 | 1.96 | 9.17  |
| MODEL.PDB | O, A_THR_284   | N, A_ASN_280   | H, A_ASN_280    | 2.94 | 1.96 | 10.38 |
| MODEL.PDB | O, A_ASN_280   | N, A_GLY_283   | H, A_GLY_283    | 2.96 | 2.01 | 17.01 |
| MODEL.PDB | O, A_LYS_278   | N, A_THR_286   | H, A_THR_286    | 2.96 | 1.98 | 10.87 |
| MODEL.PDB | OD1, A_ASN_280 | OG1, A_THR_286 | HG1, A_THR_286  | 2.71 | 1.94 | 29.85 |
| MODEL.PDB | O, A_LEU_276   | N, A_VAL_289   | H, A_VAL_289    | 2.95 | 1.96 | 9.94  |
| MODEL.PDB | O, A_THR_274   | N, A_CYS_291   | H, A_CYS_291    | 2.95 | 2.00 | 16.00 |
| MODEL.PDB | OD2, A_ASP_294 | N, A_LEU_296   | H, A_LEU_296    | 2.82 | 1.92 | 22.27 |
| MODEL.PDB | OD1, A_ASP_294 | N, A_SER_297   | H, A_SER_297    | 2.97 | 2.06 | 20.77 |
| MODEL.PDB | O, A_LEU_296   | N, A_LYS_300   | H, A_LYS_300    | 2.92 | 1.94 | 10.34 |
| MODEL.PDB | OG, A_SER_50   | NZ, A_LYS_304  | HZ3, A_LYS_304  | 2.91 | 1.95 | 14.53 |
| MODEL.PDB | O, A_THR_307   | OG, A_SER_305  | HG, A_SER_305   | 2.80 | 1.88 | 13.53 |
| MODEL.PDB | OG1, A_THR_602 | N, A_VAL_308   | H, A_VAL_308    | 2.97 | 1.99 | 10.38 |
| MODEL.PDB | OD1, A_ASP_663 | NZ, A_LYS_310  | HZ2, A_LYS_310  | 2.63 | 1.74 | 22.20 |
| MODEL.PDB | OE2, A_GLU_298 | OG, A_SER_316  | HG, A_SER_316   | 2.68 | 1.73 | 6.59  |
| MODEL.PDB | O, A_GLY_593   | N, A_PHE_318   | H, A_PHE_318    | 2.98 | 2.06 | 20.51 |
| MODEL.PDB | OD2, B_ASP_737 | NH1, A_ARG_319 | HH12, A_ARG_319 | 2.74 | 1.78 | 15.71 |
| MODEL.PDB | O, A_SER_591   | N, A_VAL_320   | H, A_VAL_320    | 2.97 | 1.99 | 11.29 |
| MODEL.PDB | O, A_CYS_538   | N, A_THR_323   | H, A_THR_323    | 2.93 | 1.95 | 10.24 |

|           |                |                |                 |      |      |       |
|-----------|----------------|----------------|-----------------|------|------|-------|
| MODEL.PDB | O, A.ASN_542   | N, A.ARG_328   | H, A.ARG_328    | 2.88 | 1.98 | 21.34 |
| MODEL.PDB | OE1, A.GLN_580 | N, A.PHE_329   | H, A.PHE_329    | 2.81 | 1.82 | 9.80  |
| MODEL.PDB | OD1, A.ASN_334 | N, A.LEU_335   | H, A.LEU_335    | 2.82 | 1.96 | 26.15 |
| MODEL.PDB | O, A.CYS_336   | N, A.PHE_338   | H, A.PHE_338    | 2.97 | 2.14 | 29.13 |
| MODEL.PDB | O, A.PHE_338   | N, A.VAL_341   | H, A.VAL_341    | 2.95 | 2.02 | 18.44 |
| MODEL.PDB | O, A.PHE_338   | N, A.PHE_342   | H, A.PHE_342    | 2.98 | 2.01 | 12.39 |
| MODEL.PDB | O, A.THR_345   | NH2, A.ARG_346 | HH21, A.ARG_346 | 2.80 | 1.86 | 17.05 |
| MODEL.PDB | OD1, A.ASP_398 | NE, A.ARG_355  | HE, A.ARG_355   | 2.67 | 1.68 | 10.27 |
| MODEL.PDB | OD2, A.ASP_398 | NH2, A.ARG_355 | HH21, A.ARG_355 | 2.63 | 1.83 | 29.83 |
| MODEL.PDB | O, A.ALA_397   | N, A.LYS_356   | H, A.LYS_356    | 2.93 | 1.96 | 11.64 |
| MODEL.PDB | O, A.VAL_395   | N, A.ILE_358   | H, A.ILE_358    | 2.71 | 1.71 | 4.67  |
| MODEL.PDB | OD1, A.ASN_394 | OG, A.SER_359  | HG, A.SER_359   | 2.65 | 1.78 | 19.43 |
| MODEL.PDB | O, A.ASN_334   | N, A.VAL_362   | H, A.VAL_362    | 2.75 | 1.76 | 9.36  |
| MODEL.PDB | O, A.CYS_525   | N, A.ALA_363   | H, A.ALA_363    | 2.83 | 1.91 | 19.65 |
| MODEL.PDB | O, A.SER_366   | N, A.ASN_370   | H, A.ASN_370    | 2.89 | 1.93 | 14.11 |
| MODEL.PDB | O, A.ALA_435   | N, A.SER_375   | H, A.SER_375    | 2.89 | 1.98 | 21.38 |
| MODEL.PDB | O, A.ALA_435   | N, A.THR_376   | H, A.THR_376    | 2.80 | 1.87 | 18.08 |
| MODEL.PDB | O, A.SER_383   | N, A.LYS_386   | H, A.LYS_386    | 2.96 | 1.96 | 7.83  |
| MODEL.PDB | OG, A.SER_383  | NZ, A.LYS_386  | HZ1, A.LYS_386  | 2.87 | 2.00 | 24.63 |
| MODEL.PDB | O, A.VAL_524   | N, A.PHE_392   | H, A.PHE_392    | 2.75 | 1.76 | 8.61  |
| MODEL.PDB | O, A.GLU_516   | N, A.THR_393   | H, A.THR_393    | 2.86 | 1.93 | 18.67 |
| MODEL.PDB | O, A.ALA_520   | OG1, A.THR_393 | HG1, A.THR_393  | 2.79 | 2.02 | 29.69 |
| MODEL.PDB | OE1, A.GLU_516 | ND2, A.ASN_394 | HD21, A.ASN_394 | 2.79 | 1.83 | 15.55 |
| MODEL.PDB | O, A.SER_514   | N, A.TYR_396   | H, A.TYR_396    | 2.91 | 1.91 | 5.69  |
| MODEL.PDB | O, A.LYS_356   | N, A.ALA_397   | H, A.ALA_397    | 2.88 | 1.87 | 3.73  |
| MODEL.PDB | O, A.VAL_512   | N, A.ASP_398   | H, A.ASP_398    | 2.91 | 1.92 | 10.71 |
| MODEL.PDB | O, A.ASN_354   | N, A.SER_399   | H, A.SER_399    | 2.78 | 1.82 | 14.47 |
| MODEL.PDB | O, A.GLN_506   | N, A.GLY_404   | H, A.GLY_404    | 2.96 | 2.12 | 27.68 |
| MODEL.PDB | O, A.GLU_406   | N, A.GLN_409   | H, A.GLN_409    | 2.88 | 2.02 | 26.07 |
| MODEL.PDB | OD2, A.ASP_420 | N, A.GLY_416   | H, A.GLY_416    | 2.76 | 1.75 | 4.30  |
| MODEL.PDB | O, A.GLY_416   | N, A.ASP_420   | H, A.ASP_420    | 2.89 | 1.90 | 9.12  |
| MODEL.PDB | O, A.LYS_417   | ND2, A.ASN_422 | HD21, A.ASN_422 | 2.79 | 1.87 | 19.66 |
| MODEL.PDB | O, A.ARG_454   | ND2, A.ASN_422 | HD22, A.ASN_422 | 2.96 | 2.03 | 19.30 |
| MODEL.PDB | O, A.ILE_418   | N, A.TYR_423   | H, A.TYR_423    | 2.93 | 2.07 | 26.20 |
| MODEL.PDB | OD1, A.ASP_428 | N, A.PHE_429   | H, A.PHE_429    | 2.69 | 1.82 | 24.27 |
| MODEL.PDB | O, A.LYS_378   | N, A.VAL_433   | H, A.VAL_433    | 2.77 | 1.78 | 8.60  |
| MODEL.PDB | O, A.VAL_511   | N, A.ILE_434   | H, A.ILE_434    | 2.87 | 1.88 | 7.98  |
| MODEL.PDB | O, A.THR_376   | N, A.ALA_435   | H, A.ALA_435    | 2.87 | 1.87 | 5.43  |
| MODEL.PDB | OE1, A.GLN_506 | ND2, A.ASN_437 | HD22, A.ASN_437 | 2.76 | 1.75 | 1.26  |
| MODEL.PDB | O, A.PRO_507   | N, A.SER_438   | H, A.SER_438    | 2.93 | 1.99 | 17.33 |
| MODEL.PDB | OD1, A.ASN_437 | N, A.ASN_439   | H, A.ASN_439    | 2.96 | 2.00 | 13.44 |
| MODEL.PDB | O, A.ASN_437   | ND2, A.ASN_440 | HD22, A.ASN_440 | 2.94 | 1.98 | 14.12 |
| MODEL.PDB | O, A.SER_438   | N, A.ASP_442   | H, A.ASP_442    | 2.86 | 1.86 | 8.06  |
| MODEL.PDB | O, A.ASN_439   | N, A.LYS_444   | H, A.LYS_444    | 2.74 | 1.85 | 22.59 |
| MODEL.PDB | O, A.SER_443   | N, A.GLY_446   | H, A.GLY_446    | 2.87 | 1.94 | 17.87 |
| MODEL.PDB | OE1, A.GLN_498 | ND2, A.ASN_448 | HD21, A.ASN_448 | 2.95 | 2.09 | 25.72 |
| MODEL.PDB | OG, A.SER_349  | N, A.LEU_452   | H, A.LEU_452    | 2.95 | 1.98 | 11.79 |
| MODEL.PDB | O, A.GLN_493   | N, A.TYR_453   | H, A.TYR_453    | 2.93 | 1.92 | 5.92  |
| MODEL.PDB | OD1, A.ASN_422 | N, A.ARG_454   | H, A.ARG_454    | 2.75 | 1.77 | 11.10 |
| MODEL.PDB | O, A.PRO_491   | N, A.LEU_455   | H, A.LEU_455    | 2.93 | 1.93 | 7.72  |
| MODEL.PDB | OE1, A.GLU_471 | NZ, A.LYS_458  | HZ1, A.LYS_458  | 2.43 | 1.55 | 23.29 |
| MODEL.PDB | O, A.LEU_461   | OG, A.SER_459  | HG, A.SER_459   | 2.80 | 1.90 | 16.75 |
| MODEL.PDB | OE2, A.GLU_465 | ND2, A.ASN_460 | HD21, A.ASN_460 | 2.81 | 1.80 | 4.71  |
| MODEL.PDB | OD1, A.ASP_467 | NE, A.ARG_466  | HE, A.ARG_466   | 2.70 | 1.70 | 7.41  |
| MODEL.PDB | OD2, A.ASP_467 | NH1, A.ARG_466 | HH11, A.ARG_466 | 2.66 | 1.80 | 25.17 |
| MODEL.PDB | O, A.VAL_483   | OH, A.TYR_473  | HH, A.TYR_473   | 2.71 | 1.79 | 14.10 |
| MODEL.PDB | O, A.TYR_473   | N, A.GLY_476   | H, A.GLY_476    | 2.92 | 1.98 | 17.30 |
| MODEL.PDB | O, A.PRO_479   | N, A.GLY_482   | H, A.GLY_482    | 2.79 | 1.82 | 12.46 |

|           |                |                |                 |      |      |       |
|-----------|----------------|----------------|-----------------|------|------|-------|
| MODEL.PDB | O, A_GLY_482   | N, A_GLY_485   | H, A_GLY_485    | 2.91 | 2.09 | 29.03 |
| MODEL.PDB | O, A_PHE_486   | N, A_CYS_488   | H, A_CYS_488    | 2.97 | 2.13 | 28.02 |
| MODEL.PDB | O, A_TYR_453   | N, A_GLN_493   | H, A_GLN_493    | 2.99 | 1.99 | 6.69  |
| MODEL.PDB | O, A_TYR_451   | N, A_TYR_495   | H, A_TYR_495    | 2.96 | 1.97 | 9.57  |
| MODEL.PDB | O, A_ASN_501   | OH, A_TYR_505  | HH, A_TYR_505   | 2.88 | 2.04 | 24.22 |
| MODEL.PDB | O, A_GLY_502   | NE2, A_GLN_506 | HE21, A_GLN_506 | 2.98 | 2.00 | 10.57 |
| MODEL.PDB | O, A_ILE_402   | N, A_TYR_508   | H, A_TYR_508    | 2.82 | 1.83 | 8.87  |
| MODEL.PDB | OD2, A_ASP_442 | NE, A_ARG_509  | HE, A_ARG_509   | 2.69 | 1.74 | 14.88 |
| MODEL.PDB | OD1, A_ASP_442 | NH1, A_ARG_509 | HH11, A_ARG_509 | 2.80 | 1.80 | 3.45  |
| MODEL.PDB | O, A_PHE_400   | N, A_VAL_510   | H, A_VAL_510    | 2.87 | 1.87 | 6.51  |
| MODEL.PDB | O, A_ILE_434   | N, A_VAL_511   | H, A_VAL_511    | 2.81 | 1.80 | 5.23  |
| MODEL.PDB | O, A_CYS_432   | N, A_LEU_513   | H, A_LEU_513    | 2.80 | 1.79 | 4.79  |
| MODEL.PDB | O, A_TYR_396   | N, A_SER_514   | H, A_SER_514    | 2.93 | 1.94 | 9.36  |
| MODEL.PDB | O, A_ASN_394   | N, A_GLU_516   | H, A_GLU_516    | 2.89 | 1.88 | 3.81  |
| MODEL.PDB | O, A_THR_393   | OG1, A_THR_523 | HG1, A_THR_523  | 2.72 | 1.84 | 18.92 |
| MODEL.PDB | O, A_LEU_552   | N, A_ASN_536   | H, A_ASN_536    | 2.75 | 1.74 | 3.68  |
| MODEL.PDB | O, A_GLY_550   | N, A_VAL_539   | H, A_VAL_539    | 2.92 | 1.94 | 9.43  |
| MODEL.PDB | O, A_GLY_548   | N, A_PHE_541   | H, A_PHE_541    | 2.91 | 1.91 | 3.70  |
| MODEL.PDB | O, A_ILE_326   | N, A_ASN_542   | H, A_ASN_542    | 2.93 | 1.97 | 13.73 |
| MODEL.PDB | O, A_LEU_546   | N, A_PHE_543   | H, A_PHE_543    | 2.77 | 1.83 | 17.00 |
| MODEL.PDB | O, A_PHE_543   | N, A_LEU_546   | H, A_LEU_546    | 2.91 | 1.96 | 16.31 |
| MODEL.PDB | O, A_THR_588   | N, A_VAL_551   | H, A_VAL_551    | 2.76 | 1.79 | 12.83 |
| MODEL.PDB | OD2, A_ASP_574 | NZ, A_LYS_557  | HZ1, A_LYS_557  | 2.65 | 1.80 | 26.29 |
| MODEL.PDB | OD1, A_ASP_568 | NZ, A_LYS_557  | HZ2, A_LYS_557  | 2.72 | 1.90 | 29.52 |
| MODEL.PDB | O, A_PRO_330   | NE2, A_GLN_564 | HE22, A_GLN_564 | 2.94 | 2.08 | 25.95 |
| MODEL.PDB | O, A_ALA_575   | N, A_GLY_566   | H, A_GLY_566    | 2.80 | 1.88 | 19.43 |
| MODEL.PDB | O, B_PHE_43    | N, A_ARG_567   | H, A_ARG_567    | 2.91 | 1.92 | 8.97  |
| MODEL.PDB | O, A_ILE_569   | OG1, A_THR_572 | HG1, A_THR_572  | 2.67 | 1.71 | 1.58  |
| MODEL.PDB | O, A_LEU_585   | N, A_VAL_576   | H, A_VAL_576    | 2.85 | 1.87 | 11.61 |
| MODEL.PDB | O, A_GLN_564   | N, A_ARG_577   | H, A_ARG_577    | 2.89 | 1.89 | 5.64  |
| MODEL.PDB | O, A_GLN_563   | NH2, A_ARG_577 | HH21, A_ARG_577 | 2.74 | 1.89 | 25.87 |
| MODEL.PDB | OE1, A_GLN_564 | NH2, A_ARG_577 | HH22, A_ARG_577 | 2.71 | 1.88 | 28.37 |
| MODEL.PDB | O, A_PHE_329   | NE2, A_GLN_580 | HE22, A_GLN_580 | 2.80 | 1.86 | 17.32 |
| MODEL.PDB | OD1, A_ASP_578 | N, A_GLU_583   | H, A_GLU_583    | 2.90 | 1.95 | 17.00 |
| MODEL.PDB | O, A_VAL_576   | N, A_LEU_585   | H, A_LEU_585    | 2.84 | 1.87 | 12.06 |
| MODEL.PDB | O, A_THR_553   | N, A_ASP_586   | H, A_ASP_586    | 2.92 | 1.94 | 11.42 |
| MODEL.PDB | O, A_ASP_574   | N, A_ILE_587   | H, A_ILE_587    | 2.68 | 1.77 | 20.36 |
| MODEL.PDB | O, A_SER_316   | N, A_VAL_595   | H, A_VAL_595    | 2.97 | 1.97 | 1.84  |
| MODEL.PDB | O, A_TYR_313   | N, A_VAL_597   | H, A_VAL_597    | 2.95 | 1.98 | 13.96 |
| MODEL.PDB | O, A_ALA_609   | N, A_ILE_598   | H, A_ILE_598    | 2.81 | 1.84 | 12.73 |
| MODEL.PDB | O, A_VAL_308   | N, A_THR_602   | H, A_THR_602    | 2.89 | 1.96 | 18.79 |
| MODEL.PDB | O, A_PRO_600   | OG1, A_THR_604 | HG1, A_THR_604  | 2.84 | 2.00 | 24.26 |
| MODEL.PDB | OH, A_TYR_636  | NE2, A_GLN_607 | HE22, A_GLN_607 | 2.96 | 2.00 | 15.28 |
| MODEL.PDB | O, A_ILE_651   | N, A_VAL_610   | H, A_VAL_610    | 2.87 | 1.88 | 9.58  |
| MODEL.PDB | O, A_SER_596   | N, A_LEU_611   | H, A_LEU_611    | 2.77 | 1.79 | 10.81 |
| MODEL.PDB | O, A_CYS_649   | N, A_TYR_612   | H, A_TYR_612    | 2.95 | 1.95 | 5.25  |
| MODEL.PDB | OD2, A_ASP_627 | NE2, A_GLN_628 | HE21, A_GLN_628 | 2.77 | 1.86 | 20.74 |
| MODEL.PDB | OG1, A_THR_632 | OG1, A_THR_630 | HG1, A_THR_630  | 2.93 | 2.01 | 13.87 |
| MODEL.PDB | OE1, A_GLN_628 | N, A_ARG_634   | H, A_ARG_634    | 2.91 | 1.90 | 4.18  |
| MODEL.PDB | O, A_SER_637   | N, A_SER_640   | H, A_SER_640    | 2.95 | 1.96 | 10.14 |
| MODEL.PDB | O, A_GLY_648   | OG1, A_THR_645 | HG1, A_THR_645  | 2.61 | 1.70 | 14.29 |
| MODEL.PDB | O, A_PHE_643   | N, A_LEU_650   | H, A_LEU_650    | 2.84 | 1.84 | 6.92  |
| MODEL.PDB | O, A_VAL_610   | N, A_ILE_651   | H, A_ILE_651    | 2.81 | 1.82 | 9.29  |
| MODEL.PDB | O, A_ASN_641   | N, A_GLY_652   | H, A_GLY_652    | 2.89 | 1.91 | 11.58 |
| MODEL.PDB | O, A_ILE_692   | N, A_GLU_654   | H, A_GLU_654    | 2.86 | 1.86 | 5.94  |
| MODEL.PDB | O, A_THR_696   | OG, A_SER_659  | HG, A_SER_659   | 2.72 | 1.91 | 26.75 |
| MODEL.PDB | OD1, A_ASN_658 | OH, A_TYR_660  | HH, A_TYR_660   | 2.82 | 1.96 | 21.62 |
| MODEL.PDB | OE2, A_GLU_661 | N, A_CYS_662   | H, A_CYS_662    | 2.68 | 1.71 | 13.40 |

|           |                |                |                 |      |      |       |
|-----------|----------------|----------------|-----------------|------|------|-------|
| MODEL.PDB | O, A_ILE.670   | N, A_ILE.666   | H, A_ILE.666    | 2.97 | 2.04 | 18.47 |
| MODEL.PDB | O, B_PRO.863   | N, A_ALA.668   | H, A_ALA.668    | 2.78 | 1.79 | 9.02  |
| MODEL.PDB | O, B_LEU.864   | N, A_GLY.669   | H, A_GLY.669    | 2.82 | 1.95 | 24.85 |
| MODEL.PDB | OD2, A_ASP.663 | OG, A_SER.673  | HG, A_SER.673   | 2.68 | 1.81 | 20.07 |
| MODEL.PDB | O, A_SER.680   | NE2, A_GLN.675 | HE21, A_GLN.675 | 2.84 | 1.86 | 12.29 |
| MODEL.PDB | O, A_THR.604   | NE, A_ARG.683  | HE, A_ARG.683   | 2.90 | 1.95 | 15.53 |
| MODEL.PDB | O, A_SER.691   | N, A_ALA.688   | H, A_ALA.688    | 2.92 | 2.02 | 21.69 |
| MODEL.PDB | O, A_SER.689   | NE2, A_GLN.690 | HE21, A_GLN.690 | 2.81 | 1.89 | 20.34 |
| MODEL.PDB | O, A_GLU.654   | N, A_ALA.694   | H, A_ALA.694    | 2.80 | 1.83 | 12.75 |
| MODEL.PDB | O, A_GLU.661   | OH, A_TYR.695  | HH, A_TYR.695   | 2.62 | 1.68 | 9.06  |
| MODEL.PDB | O, A_GLY.669   | N, A_MET.697   | H, A_MET.697    | 2.86 | 1.87 | 9.86  |
| MODEL.PDB | O, A_TYR.660   | N, A_SER.698   | H, A_SER.698    | 2.75 | 1.74 | 2.22  |
| MODEL.PDB | O, B_ASP.796   | OH, A_TYR.707  | HH, A_TYR.707   | 2.70 | 1.86 | 23.36 |
| MODEL.PDB | OD1, A_ASN.710 | OG, A_SER.708  | HG, A_SER.708   | 2.64 | 1.84 | 27.39 |
| MODEL.PDB | OD1, A_ASN.717 | N, A_PHE.718   | H, A_PHE.718    | 2.87 | 1.98 | 22.86 |
| MODEL.PDB | OE1, A_GLN.926 | N, A_ILE.720   | H, A_ILE.720    | 2.86 | 1.86 | 8.42  |
| MODEL.PDB | OD2, A_ASP.775 | NZ, A_LYS.733  | HZ3, A_LYS.733  | 2.60 | 1.62 | 11.48 |
| MODEL.PDB | O, A_THR.859   | N, A_SER.735   | H, A_SER.735    | 2.98 | 2.00 | 11.48 |
| MODEL.PDB | O, A_GLY.857   | N, A_ASP.737   | H, A_ASP.737    | 2.75 | 1.75 | 6.26  |
| MODEL.PDB | OD1, A_ASP.737 | N, A_THR.739   | H, A_THR.739    | 2.98 | 2.15 | 28.75 |
| MODEL.PDB | O, A_ASP.737   | N, A_TYR.741   | H, A_TYR.741    | 2.83 | 1.88 | 16.65 |
| MODEL.PDB | O, A_CYS.738   | N, A_ILE.742   | H, A_ILE.742    | 2.96 | 1.96 | 5.81  |
| MODEL.PDB | O, A_LEU.754   | N, A_GLY.757   | H, A_GLY.757    | 2.99 | 2.08 | 20.35 |
| MODEL.PDB | O, A_CYS.760   | N, A_ASN.764   | H, A_ASN.764    | 2.99 | 2.00 | 9.92  |
| MODEL.PDB | O, A_THR.761   | N, A_ARG.765   | H, A_ARG.765    | 2.94 | 1.97 | 13.53 |
| MODEL.PDB | OG1, C_THR.961 | NH2, A_ARG.765 | HH22, A_ARG.765 | 2.95 | 1.98 | 13.10 |
| MODEL.PDB | O, A_GLN.762   | N, A_ALA.766   | H, A_ALA.766    | 2.91 | 1.95 | 14.00 |
| MODEL.PDB | O, A_ASN.764   | N, A_THR.768   | H, A_THR.768    | 2.87 | 1.89 | 11.48 |
| MODEL.PDB | O, A_ASN.764   | OG1, A_THR.768 | HG1, A_THR.768  | 2.93 | 2.04 | 18.67 |
| MODEL.PDB | O, A_ARG.765   | N, A_GLY.769   | H, A_GLY.769    | 2.83 | 1.85 | 11.62 |
| MODEL.PDB | O, A_LEU.767   | N, A_ALA.771   | H, A_ALA.771    | 3.00 | 2.03 | 13.96 |
| MODEL.PDB | O, A_THR.768   | N, A_VAL.772   | H, A_VAL.772    | 2.95 | 1.97 | 11.62 |
| MODEL.PDB | O, A_GLU.773   | N, A_ASN.777   | H, A_ASN.777    | 2.90 | 1.96 | 17.54 |
| MODEL.PDB | O, A_LYS.776   | N, A_GLU.780   | H, A_GLU.780    | 2.69 | 1.72 | 13.06 |
| MODEL.PDB | O, A_ASN.777   | N, A_VAL.781   | H, A_VAL.781    | 2.92 | 1.93 | 8.95  |
| MODEL.PDB | O, A_THR.778   | N, A_PHE.782   | H, A_PHE.782    | 2.97 | 2.03 | 17.12 |
| MODEL.PDB | O, A_GLN.779   | N, A_ALA.783   | H, A_ALA.783    | 2.88 | 1.94 | 18.54 |
| MODEL.PDB | O, C_ALA.701   | N, A_ILE.788   | H, A_ILE.788    | 2.77 | 1.84 | 18.31 |
| MODEL.PDB | O, A_ASP.796   | N, A_GLY.798   | H, A_GLY.798    | 2.76 | 1.87 | 22.26 |
| MODEL.PDB | OD1, A_ASN.928 | N, A_ASN.801   | H, A_ASN.801    | 2.77 | 1.78 | 8.53  |
| MODEL.PDB | OD2, A_ASP.808 | OG, A_SER.810  | HG, A_SER.810   | 2.73 | 1.94 | 28.41 |
| MODEL.PDB | O, A_PRO.809   | NZ, A_LYS.814  | HZ1, A_LYS.814  | 2.69 | 1.78 | 20.99 |
| MODEL.PDB | OD1, A_ASP.820 | NH1, A_ARG.815 | HH11, A_ARG.815 | 2.65 | 1.73 | 19.61 |
| MODEL.PDB | OE1, A_GLU.819 | N, A_SER.816   | H, A_SER.816    | 2.97 | 1.97 | 5.35  |
| MODEL.PDB | OG, A_SER.816  | N, A_GLU.819   | H, A_GLU.819    | 2.89 | 1.90 | 8.71  |
| MODEL.PDB | O, A_SER.816   | N, A_ASP.820   | H, A_ASP.820    | 2.88 | 1.89 | 8.63  |
| MODEL.PDB | O, A_ILE.818   | N, A_LEU.822   | H, A_LEU.822    | 2.76 | 1.81 | 15.85 |
| MODEL.PDB | O, A_GLU.819   | N, A_PHE.823   | H, A_PHE.823    | 2.96 | 1.97 | 8.29  |
| MODEL.PDB | O, A_SER.939   | NZ, A_LYS.825  | HZ1, A_LYS.825  | 2.84 | 2.00 | 27.52 |
| MODEL.PDB | O, A_THR.941   | NZ, A_LYS.825  | HZ3, A_LYS.825  | 2.82 | 1.84 | 9.65  |
| MODEL.PDB | OD1, A_ASP.830 | N, A_GLY.832   | H, A_GLY.832    | 2.78 | 1.79 | 8.57  |
| MODEL.PDB | O, C_ASP.614   | NE, A_ARG.847  | HE, A_ARG.847   | 2.97 | 2.12 | 27.07 |
| MODEL.PDB | O, C_ASP.614   | NH1, A_ARG.847 | HH11, A_ARG.847 | 2.71 | 1.79 | 19.16 |
| MODEL.PDB | O, A_ALA.846   | NH2, A_ARG.847 | HH21, A_ARG.847 | 2.88 | 1.89 | 8.74  |
| MODEL.PDB | O, A_CYS.851   | N, A_GLN.853   | H, A_GLN.853    | 2.90 | 2.01 | 22.82 |
| MODEL.PDB | O, A_THR.859   | NZ, A_LYS.854  | HZ2, A_LYS.854  | 2.82 | 1.97 | 27.00 |
| MODEL.PDB | OG1, A_THR.734 | NZ, A_LYS.854  | HZ3, A_LYS.854  | 2.90 | 2.01 | 23.94 |
| MODEL.PDB | O, A_SER.735   | N, A_THR.859   | H, A_THR.859    | 2.88 | 1.89 | 7.72  |

|           |                |                |                 |      |      |       |
|-----------|----------------|----------------|-----------------|------|------|-------|
| MODEL.PDB | OD2, C_ASP_614 | OG1, A_THR_859 | HG1, A_THR_859  | 2.83 | 1.95 | 19.70 |
| MODEL.PDB | O, A_LYS_733   | N, A_LEU_861   | H, A_LEU_861    | 2.77 | 1.82 | 15.26 |
| MODEL.PDB | OD1, A_ASP_775 | N, A_LEU_864   | H, A_LEU_864    | 2.74 | 1.75 | 8.23  |
| MODEL.PDB | O, A_THR_866   | N, A_ILE_870   | H, A_ILE_870    | 2.78 | 1.79 | 9.38  |
| MODEL.PDB | OE2, A_GLU_819 | OG1, A_THR_874 | HG1, A_THR_874  | 2.63 | 1.71 | 12.98 |
| MODEL.PDB | O, A_ALA_871   | N, A_SER_875   | H, A_SER_875    | 2.96 | 1.96 | 8.90  |
| MODEL.PDB | O, A_GLN_872   | N, A_ALA_876   | H, A_ALA_876    | 2.99 | 2.03 | 14.76 |
| MODEL.PDB | O, A_TYR_873   | N, A_LEU_877   | H, A_LEU_877    | 2.94 | 1.94 | 8.91  |
| MODEL.PDB | O, A_SER_875   | N, A_ALA_879   | H, A_ALA_879    | 2.85 | 1.87 | 12.06 |
| MODEL.PDB | O, A_ALA_879   | OG1, A_THR_883 | HG1, A_THR_883  | 2.74 | 1.87 | 20.29 |
| MODEL.PDB | O, A_GLY_880   | N, A_SER_884   | H, A_SER_884    | 2.74 | 1.84 | 21.59 |
| MODEL.PDB | O, A_SER_884   | OG1, A_THR_887 | HG1, A_THR_887  | 2.69 | 1.84 | 22.55 |
| MODEL.PDB | O, A_THR_881   | NE2, A_GLN_901 | HE22, A_GLN_901 | 2.83 | 1.89 | 17.61 |
| MODEL.PDB | O, A_PHE_898   | N, A_MET_902   | H, A_MET_902    | 2.91 | 1.94 | 13.16 |
| MODEL.PDB | O, A_ALA_899   | N, A_ALA_903   | H, A_ALA_903    | 2.87 | 1.89 | 10.99 |
| MODEL.PDB | O, A_TYR_904   | N, A_GLY_908   | H, A_GLY_908    | 2.76 | 1.80 | 14.47 |
| MODEL.PDB | O, A_ASN_907   | N, A_GLY_910   | H, A_GLY_910    | 2.96 | 2.02 | 16.87 |
| MODEL.PDB | O, A_ASN_914   | N, A_GLU_918   | H, A_GLU_918    | 2.85 | 1.84 | 2.96  |
| MODEL.PDB | O, A_LEU_922   | N, A_GLN_926   | H, A_GLN_926    | 2.88 | 1.89 | 7.46  |
| MODEL.PDB | O, A_ILE_923   | N, A_PHE_927   | H, A_PHE_927    | 2.88 | 1.91 | 11.70 |
| MODEL.PDB | O, A_ALA_924   | N, A_ASN_928   | H, A_ASN_928    | 2.89 | 1.90 | 9.51  |
| MODEL.PDB | O, A_GLN_926   | N, A_ALA_930   | H, A_ALA_930    | 2.86 | 1.91 | 16.76 |
| MODEL.PDB | O, A_PHE_927   | N, A_ILE_931   | H, A_ILE_931    | 2.94 | 1.95 | 8.80  |
| MODEL.PDB | OD1, A_ASP_936 | NE2, A_GLN_935 | HE21, A_GLN_935 | 2.78 | 1.84 | 17.00 |
| MODEL.PDB | O, A_LYS_933   | N, A_SER_937   | H, A_SER_937    | 2.83 | 1.86 | 13.30 |
| MODEL.PDB | O, A_ILE_934   | N, A_LEU_938   | H, A_LEU_938    | 2.93 | 1.95 | 10.55 |
| MODEL.PDB | O, A_GLN_935   | N, A_SER_939   | H, A_SER_939    | 2.87 | 1.95 | 18.79 |
| MODEL.PDB | O, A_ALA_942   | OG, A_SER_943  | HG, A_SER_943   | 2.85 | 1.99 | 21.59 |
| MODEL.PDB | O, A_LEU_945   | N, A_GLN_949   | H, A_GLN_949    | 2.94 | 1.98 | 14.33 |
| MODEL.PDB | OD1, A_ASN_953 | NE2, A_GLN_949 | HE21, A_GLN_949 | 2.96 | 1.95 | 3.82  |
| MODEL.PDB | O, A_GLY_946   | N, A_ASP_950   | H, A_ASP_950    | 2.94 | 1.97 | 13.52 |
| MODEL.PDB | O, A_GLN_949   | N, A_ASN_953   | H, A_ASN_953    | 2.87 | 1.89 | 11.96 |
| MODEL.PDB | O, A_ASP_950   | N, A_GLN_954   | H, A_GLN_954    | 2.87 | 1.87 | 8.29  |
| MODEL.PDB | O, A_ASN_953   | N, A_GLN_957   | H, A_GLN_957    | 2.89 | 1.92 | 12.65 |
| MODEL.PDB | O, A_GLN_954   | N, A_ALA_958   | H, A_ALA_958    | 2.93 | 1.97 | 14.97 |
| MODEL.PDB | O, A_ALA_956   | N, A_ASN_960   | H, A_ASN_960    | 2.92 | 1.94 | 9.86  |
| MODEL.PDB | O, A_GLN_957   | N, A_THR_961   | H, A_THR_961    | 2.91 | 1.93 | 11.06 |
| MODEL.PDB | O, A_LEU_959   | N, A_VAL_963   | H, A_VAL_963    | 2.96 | 1.97 | 8.70  |
| MODEL.PDB | O, A_ASN_960   | N, A_LYS_964   | H, A_LYS_964    | 2.96 | 2.00 | 13.66 |
| MODEL.PDB | OE1, A_GLN_965 | OG, A_SER_968  | HG, A_SER_968   | 2.75 | 1.97 | 29.51 |
| MODEL.PDB | O, B_GLN_755   | N, A_PHE_970   | H, A_PHE_970    | 2.80 | 1.82 | 10.56 |
| MODEL.PDB | OE1, A_GLN_992 | N, A_ILE_973   | H, A_ILE_973    | 2.87 | 1.98 | 23.13 |
| MODEL.PDB | O, C_THR_547   | ND2, A_ASN_978 | HD21, A_ASN_978 | 2.99 | 2.12 | 24.76 |
| MODEL.PDB | O, A_ASN_978   | N, A_SER_982   | H, A_SER_982    | 2.83 | 1.91 | 20.13 |
| MODEL.PDB | OE2, A_GLU_988 | N, A_ASP_985   | H, A_ASP_985    | 2.80 | 1.81 | 9.30  |
| MODEL.PDB | OD2, A_ASP_985 | N, A_LYS_986   | H, A_LYS_986    | 2.76 | 1.82 | 17.86 |
| MODEL.PDB | O, A_ASP_985   | N, A_ALA_989   | H, A_ALA_989    | 2.81 | 1.89 | 18.69 |
| MODEL.PDB | O, A_ALA_989   | N, A_ILE_993   | H, A_ILE_993    | 2.88 | 1.90 | 11.01 |
| MODEL.PDB | O, A_GLU_990   | N, A_ASP_994   | H, A_ASP_994    | 2.77 | 1.81 | 13.95 |
| MODEL.PDB | O, A_GLY_971   | NE, A_ARG_995  | HE, A_ARG_995   | 2.85 | 2.01 | 27.94 |
| MODEL.PDB | OD2, B_ASP_994 | NH1, A_ARG_995 | HH12, A_ARG_995 | 2.69 | 1.68 | 3.63  |
| MODEL.PDB | OD1, B_ASP_994 | NH2, A_ARG_995 | HH22, A_ARG_995 | 2.66 | 1.65 | 4.49  |
| MODEL.PDB | O, A_ILE_993   | N, A_ILE_997   | H, A_ILE_997    | 2.74 | 1.75 | 7.28  |
| MODEL.PDB | O, A_ASP_994   | OG1, A_THR_998 | HG1, A_THR_998  | 2.80 | 2.00 | 27.57 |
| MODEL.PDB | O, B_VAL_62    | N, B_THR_29    | H, B_THR_29     | 2.85 | 1.84 | 2.85  |
| MODEL.PDB | O, B_SER_60    | N, B_SER_31    | H, B_SER_31     | 2.96 | 1.96 | 7.86  |
| MODEL.PDB | O, B_GLY_219   | NE, B_ARG_34   | HE, B_ARG_34    | 2.92 | 2.08 | 27.78 |
| MODEL.PDB | OE2, B_GLU_191 | NH1, B_ARG_34  | HH11, B_ARG_34  | 2.59 | 1.61 | 10.99 |

|           |                |                |                 |      |      |       |
|-----------|----------------|----------------|-----------------|------|------|-------|
| MODEL.PDB | O, B_GLY_219   | NH2, B_ARG_34  | HH21, B_ARG_34  | 2.89 | 1.99 | 22.37 |
| MODEL.PDB | O, B_LEU_54    | OH, B_TYR_37   | HH, B_TYR_37    | 2.63 | 1.85 | 28.94 |
| MODEL.PDB | O, A_PHE_565   | N, B_PHE_43    | H, B_PHE_43     | 2.96 | 2.00 | 13.42 |
| MODEL.PDB | O, B_GLU_281   | OG, B_SER_45   | HG, B_SER_45    | 2.78 | 1.89 | 18.26 |
| MODEL.PDB | O, B_LEU_277   | N, B_HIS_49    | H, B_HIS_49     | 2.95 | 1.96 | 9.78  |
| MODEL.PDB | O, B_PHE_275   | N, B_THR_51    | H, B_THR_51     | 2.94 | 1.96 | 10.82 |
| MODEL.PDB | OD1, B_ASP_53  | N, B_LEU_54    | H, B_LEU_54     | 2.71 | 1.77 | 18.19 |
| MODEL.PDB | O, B_GLN_271   | N, B_PHE_55    | H, B_PHE_55     | 2.91 | 2.05 | 25.85 |
| MODEL.PDB | O, B_PRO_57    | OG, B_SER_60   | HG, B_SER_60    | 2.69 | 1.91 | 29.81 |
| MODEL.PDB | O, B_SER_60    | N, B_VAL_62    | H, B_VAL_62     | 2.95 | 2.08 | 25.32 |
| MODEL.PDB | O, B_VAL_267   | N, B_THR_63    | H, B_THR_63     | 2.93 | 1.93 | 5.51  |
| MODEL.PDB | O, B_TYR_265   | N, B_PHE_65    | H, B_PHE_65     | 2.89 | 1.94 | 15.91 |
| MODEL.PDB | ND1, B_HIS_66  | N, B_ALA_67    | H, B_ALA_67     | 2.87 | 1.93 | 17.76 |
| MODEL.PDB | O, B_ASN_74    | N, B_THR_76    | H, B_THR_76     | 2.88 | 1.98 | 22.22 |
| MODEL.PDB | O, B_ALA_243   | NH2, B_ARG_78  | HH22, B_ARG_78  | 2.71 | 1.73 | 12.65 |
| MODEL.PDB | O, B_THR_236   | N, B_PHE_86    | H, B_PHE_86     | 2.89 | 1.89 | 7.28  |
| MODEL.PDB | O, B_GLY_268   | N, B_TYR_91    | H, B_TYR_91     | 2.82 | 1.89 | 18.99 |
| MODEL.PDB | O, B_PHE_192   | N, B_PHE_92    | H, B_PHE_92     | 2.77 | 1.76 | 4.73  |
| MODEL.PDB | O, B_TYR_266   | N, B_ALA_93    | H, B_ALA_93     | 2.95 | 1.99 | 14.28 |
| MODEL.PDB | O, B_ALA_264   | OG, B_SER_94   | HG, B_SER_94    | 2.73 | 1.78 | 6.10  |
| MODEL.PDB | OE1, B_GLU_96  | N, B_LYS_97    | H, B_LYS_97     | 2.71 | 1.74 | 12.03 |
| MODEL.PDB | O, B_ASN_121   | NE, B_ARG_102  | HE, B_ARG_102   | 2.94 | 2.02 | 20.18 |
| MODEL.PDB | O, B_ILE_119   | N, B_TRP_104   | H, B_TRP_104    | 2.90 | 1.94 | 14.54 |
| MODEL.PDB | O, B_GLN_239   | N, B_ILE_105   | H, B_ILE_105    | 2.84 | 1.85 | 10.53 |
| MODEL.PDB | O, B_LEU_117   | N, B_PHE_106   | H, B_PHE_106    | 2.95 | 1.96 | 9.18  |
| MODEL.PDB | OG1, B_THR_114 | OG1, B_THR_109 | HG1, B_THR_109  | 2.95 | 2.04 | 16.45 |
| MODEL.PDB | OD1, B_ASP_111 | N, B_SER_112   | H, B_SER_112    | 2.80 | 1.91 | 22.62 |
| MODEL.PDB | OG1, B_THR_167 | NE2, B_GLN_115 | HE22, B_GLN_115 | 2.93 | 1.99 | 17.65 |
| MODEL.PDB | O, B_PHE_106   | N, B_LEU_117   | H, B_LEU_117    | 2.76 | 1.82 | 16.86 |
| MODEL.PDB | O, B_LYS_129   | N, B_LEU_118   | H, B_LEU_118    | 2.85 | 1.89 | 15.41 |
| MODEL.PDB | O, B_VAL_127   | N, B_VAL_120   | H, B_VAL_120    | 2.94 | 1.94 | 7.20  |
| MODEL.PDB | O, B_ARG_102   | N, B_ASN_121   | H, B_ASN_121    | 2.74 | 1.79 | 15.23 |
| MODEL.PDB | O, B_ASN_125   | N, B_ASN_122   | H, B_ASN_122    | 2.81 | 1.85 | 13.44 |
| MODEL.PDB | O, B_SER_172   | N, B_VAL_126   | H, B_VAL_126    | 2.86 | 1.89 | 11.70 |
| MODEL.PDB | O, B_VAL_120   | N, B_VAL_127   | H, B_VAL_127    | 2.89 | 1.88 | 1.69  |
| MODEL.PDB | O, B_TYR_170   | N, B_ILE_128   | H, B_ILE_128    | 2.88 | 1.89 | 9.86  |
| MODEL.PDB | O, B_CYS_131   | N, B_PHE_133   | H, B_PHE_133    | 2.96 | 2.08 | 23.79 |
| MODEL.PDB | O, B_SER_155   | N, B_VAL_143   | H, B_VAL_143    | 2.95 | 1.95 | 8.05  |
| MODEL.PDB | O, B_TRP_152   | N, B_SER_155   | H, B_SER_155    | 2.96 | 2.07 | 22.62 |
| MODEL.PDB | OE1, B_GLU_156 | N, B_PHE_157   | H, B_PHE_157    | 2.73 | 1.77 | 13.74 |
| MODEL.PDB | O, B_GLN_134   | OG, B_SER_161  | HG, B_SER_161   | 2.81 | 2.01 | 27.77 |
| MODEL.PDB | OE2, B_GLU_169 | N, B_PHE_168   | H, B_PHE_168    | 2.82 | 1.90 | 19.46 |
| MODEL.PDB | O, B_ILE_128   | N, B_TYR_170   | H, B_TYR_170    | 2.87 | 1.89 | 12.37 |
| MODEL.PDB | OD2, B_ASP_178 | N, B_GLU_180   | H, B_GLU_180    | 2.82 | 1.85 | 12.31 |
| MODEL.PDB | O, B_PHE_186   | N, B_GLN_183   | H, B_GLN_183    | 2.79 | 1.95 | 27.57 |
| MODEL.PDB | OD1, B_ASN_211 | ND2, B_ASN_185 | HD22, B_ASN_185 | 2.96 | 1.98 | 11.82 |
| MODEL.PDB | O, B_SER_94    | N, B_ARG_190   | H, B_ARG_190    | 2.85 | 1.85 | 6.15  |
| MODEL.PDB | O, B_PHE_92    | N, B_PHE_192   | H, B_PHE_192    | 2.74 | 1.73 | 1.77  |
| MODEL.PDB | O, B_TYR_204   | N, B_VAL_193   | H, B_VAL_193    | 2.92 | 1.95 | 13.51 |
| MODEL.PDB | O, B_VAL_90    | N, B_PHE_194   | H, B_PHE_194    | 2.95 | 1.95 | 6.38  |
| MODEL.PDB | OD1, B_ASP_53  | NZ, B_LYS_195  | HZ1, B_LYS_195  | 2.67 | 1.77 | 21.61 |
| MODEL.PDB | OH, B_TYR_37   | NZ, B_LYS_195  | HZ2, B_LYS_195  | 2.81 | 1.83 | 10.84 |
| MODEL.PDB | O, B_TYR_200   | N, B_ILE_197   | H, B_ILE_197    | 2.79 | 1.79 | 4.25  |
| MODEL.PDB | O, B_ILE_197   | N, B_TYR_200   | H, B_TYR_200    | 2.81 | 1.92 | 22.60 |
| MODEL.PDB | O, B_LEU_229   | N, B_PHE_201   | H, B_PHE_201    | 2.85 | 1.93 | 19.52 |
| MODEL.PDB | O, B_LYS_195   | N, B_LYS_202   | H, B_LYS_202    | 2.84 | 1.83 | 2.11  |
| MODEL.PDB | O, B_VAL_227   | N, B_ILE_203   | H, B_ILE_203    | 2.97 | 1.97 | 4.39  |
| MODEL.PDB | O, B_VAL_193   | N, B_TYR_204   | H, B_TYR_204    | 2.86 | 1.86 | 8.69  |



|           |                |                |                 |      |      |       |
|-----------|----------------|----------------|-----------------|------|------|-------|
| MODEL.PDB | O, B_GLU_224   | N, B_SER_205   | H, B_SER_205    | 2.74 | 1.80 | 17.11 |
| MODEL.PDB | O, B_GLU_191   | N, B_LYS_206   | H, B_LYS_206    | 2.77 | 1.92 | 26.56 |
| MODEL.PDB | OE2, B_GLU_224 | NZ, B_LYS_206  | HZ1, B_LYS_206  | 2.61 | 1.63 | 10.77 |
| MODEL.PDB | ND1, B_HIS_207 | N, B_THR_208   | H, B_THR_208    | 2.91 | 2.09 | 29.09 |
| MODEL.PDB | O, B_GLN_218   | N, B_LEU_212   | H, B_LEU_212    | 2.82 | 2.01 | 29.95 |
| MODEL.PDB | O, B_VAL_36    | N, B_LEU_223   | H, B_LEU_223    | 2.83 | 1.84 | 8.38  |
| MODEL.PDB | O, B_ILE_203   | N, B_LEU_226   | H, B_LEU_226    | 2.90 | 1.91 | 6.87  |
| MODEL.PDB | O, B_PHE_201   | N, B_LEU_229   | H, B_LEU_229    | 2.81 | 1.86 | 16.98 |
| MODEL.PDB | O, B_GLY_199   | N, B_GLY_232   | H, B_GLY_232    | 2.78 | 1.87 | 20.92 |
| MODEL.PDB | O, B_GLY_107   | N, B_THR_236   | H, B_THR_236    | 2.99 | 2.03 | 14.29 |
| MODEL.PDB | O, B_ASN_81    | NE2, B_GLN_239 | HE21, B_GLN_239 | 2.83 | 1.94 | 22.52 |
| MODEL.PDB | O, B_GLY_103   | N, B_LEU_241   | H, B_LEU_241    | 2.91 | 2.08 | 28.14 |
| MODEL.PDB | OE1, B_GLU_154 | OG, B_SER_247  | HG, B_SER_247   | 2.58 | 1.63 | 5.81  |
| MODEL.PDB | O, B_ALA_260   | N, B_ALA_262   | H, B_ALA_262    | 2.85 | 1.99 | 25.54 |
| MODEL.PDB | O, B_PHE_65    | N, B_TYR_265   | H, B_TYR_265    | 2.98 | 1.99 | 7.38  |
| MODEL.PDB | O, B_ALA_93    | N, B_TYR_266   | H, B_TYR_266    | 2.74 | 1.74 | 7.02  |
| MODEL.PDB | O, B_THR_63    | N, B_VAL_267   | H, B_VAL_267    | 2.96 | 1.99 | 13.04 |
| MODEL.PDB | O, B_TYR_91    | N, B_GLY_268   | H, B_GLY_268    | 2.83 | 1.83 | 4.91  |
| MODEL.PDB | O, B_PHE_55    | N, B_GLN_271   | H, B_GLN_271    | 2.85 | 1.93 | 19.01 |
| MODEL.PDB | O, B_ASP_53    | N, B_ARG_273   | H, B_ARG_273    | 2.97 | 2.01 | 15.13 |
| MODEL.PDB | OD2, B_ASP_290 | NE, B_ARG_273  | HE, B_ARG_273   | 2.67 | 1.80 | 24.19 |
| MODEL.PDB | OD1, B_ASP_290 | NH2, B_ARG_273 | HH21, B_ARG_273 | 2.63 | 1.66 | 12.98 |
| MODEL.PDB | O, B_THR_51    | N, B_PHE_275   | H, B_PHE_275    | 2.80 | 1.81 | 9.02  |
| MODEL.PDB | O, B_VAL_289   | N, B_LEU_276   | H, B_LEU_276    | 2.95 | 2.00 | 17.03 |
| MODEL.PDB | O, B_HIS_49    | N, B_LEU_277   | H, B_LEU_277    | 2.90 | 1.90 | 7.03  |
| MODEL.PDB | OD2, B_ASP_287 | NZ, B_LYS_278  | HZ1, B_LYS_278  | 2.60 | 1.60 | 3.72  |
| MODEL.PDB | O, B_THR_284   | N, B_ASN_280   | H, B_ASN_280    | 2.79 | 1.79 | 4.72  |
| MODEL.PDB | OD1, B_ASN_280 | N, B_GLU_281   | H, B_GLU_281    | 2.98 | 2.13 | 26.69 |
| MODEL.PDB | O, B_LEU_276   | N, B_VAL_289   | H, B_VAL_289    | 2.93 | 1.99 | 17.77 |
| MODEL.PDB | OG, B_SER_50   | NZ, B_LYS_304  | HZ1, B_LYS_304  | 2.84 | 1.83 | 5.53  |
| MODEL.PDB | O, B_THR_307   | OG, B_SER_305  | HG, B_SER_305   | 2.73 | 1.82 | 14.38 |
| MODEL.PDB | OG1, B_THR_602 | N, B_VAL_308   | H, B_VAL_308    | 2.99 | 1.99 | 5.20  |
| MODEL.PDB | OD2, B_ASP_663 | NZ, B_LYS_310  | HZ3, B_LYS_310  | 2.62 | 1.67 | 16.87 |
| MODEL.PDB | O, B_THR_599   | N, B_GLY_311   | H, B_GLY_311    | 2.99 | 2.00 | 8.71  |
| MODEL.PDB | O, B_GLY_593   | N, B_PHE_318   | H, B_PHE_318    | 2.81 | 1.82 | 8.98  |
| MODEL.PDB | OE1, B_GLN_580 | NE, B_ARG_328  | HE, B_ARG_328   | 2.68 | 1.70 | 11.58 |
| MODEL.PDB | O, B_CYS_336   | N, B_PHE_338   | H, B_PHE_338    | 2.77 | 1.88 | 22.83 |
| MODEL.PDB | O, B_PHE_338   | N, B_PHE_342   | H, B_PHE_342    | 2.91 | 1.90 | 3.53  |
| MODEL.PDB | O, B_SER_349   | N, B_ALA_352   | H, B_ALA_352    | 2.92 | 2.01 | 20.99 |
| MODEL.PDB | OD2, B_ASP_398 | NH2, B_ARG_355 | HH21, B_ARG_355 | 2.60 | 1.63 | 13.35 |
| MODEL.PDB | O, B_ALA_397   | N, B_LYS_356   | H, B_LYS_356    | 2.91 | 1.91 | 5.86  |
| MODEL.PDB | O, B_VAL_395   | N, B_ILE_358   | H, B_ILE_358    | 2.73 | 1.74 | 9.85  |
| MODEL.PDB | OG1, B_THR_523 | OG, B_SER_359  | HG, B_SER_359   | 2.73 | 1.79 | 9.26  |
| MODEL.PDB | O, B_ASN_334   | N, B_VAL_362   | H, B_VAL_362    | 2.95 | 2.00 | 16.82 |
| MODEL.PDB | O, B_CYS_525   | N, B_ALA_363   | H, B_ALA_363    | 2.82 | 1.88 | 17.11 |
| MODEL.PDB | OD1, B_ASN_388 | N, B_TYR_365   | H, B_TYR_365    | 2.92 | 1.97 | 15.70 |
| MODEL.PDB | OD1, B_ASP_364 | N, B_SER_366   | H, B_SER_366    | 2.85 | 1.92 | 18.58 |
| MODEL.PDB | OD1, B_ASP_364 | OG, B_SER_366  | HG, B_SER_366   | 2.74 | 1.87 | 20.38 |
| MODEL.PDB | O, B_TYR_365   | N, B_TYR_369   | H, B_TYR_369    | 2.94 | 2.07 | 25.38 |
| MODEL.PDB | OG, B_SER_373  | OG, B_SER_371  | HG, B_SER_371   | 2.84 | 1.90 | 10.21 |
| MODEL.PDB | OG1, B_THR_376 | NZ, B_LYS_378  | HZ3, B_LYS_378  | 2.86 | 1.89 | 13.06 |
| MODEL.PDB | O, C_LEU_984   | NZ, B_LYS_386  | HZ3, B_LYS_386  | 2.72 | 1.89 | 28.40 |
| MODEL.PDB | O, B_VAL_524   | N, B_PHE_392   | H, B_PHE_392    | 2.80 | 1.80 | 6.45  |
| MODEL.PDB | OE2, B_GLU_516 | OG1, B_THR_393 | HG1, B_THR_393  | 2.60 | 1.68 | 12.70 |
| MODEL.PDB | O, B_ILE_358   | N, B_VAL_395   | H, B_VAL_395    | 2.90 | 1.91 | 8.10  |
| MODEL.PDB | O, B_SER_514   | N, B_TYR_396   | H, B_TYR_396    | 2.73 | 1.72 | 4.61  |
| MODEL.PDB | O, B_LYS_356   | N, B_ALA_397   | H, B_ALA_397    | 2.91 | 1.97 | 16.65 |
| MODEL.PDB | O, B_VAL_512   | N, B_ASP_398   | H, B_ASP_398    | 2.89 | 1.93 | 15.82 |

|           |                |                |                 |      |      |       |
|-----------|----------------|----------------|-----------------|------|------|-------|
| MODEL.PDB | O, B.ASN_354   | N, B.SER_399   | H, B.SER_399    | 2.81 | 1.83 | 10.30 |
| MODEL.PDB | O, B.GLN_506   | N, B.GLY_404   | H, B.GLY_404    | 2.90 | 2.00 | 22.81 |
| MODEL.PDB | O, B.PRO_412   | NE2, B.GLN_414 | HE21, B.GLN_414 | 2.98 | 1.98 | 7.33  |
| MODEL.PDB | OD2, B.ASP_420 | N, B.GLY_416   | H, B.GLY_416    | 2.83 | 1.90 | 18.61 |
| MODEL.PDB | O, B.GLY_416   | N, B.ASP_420   | H, B.ASP_420    | 2.74 | 1.73 | 0.82  |
| MODEL.PDB | O, B.ILE_418   | N, B.ASN_422   | H, B.ASN_422    | 2.90 | 1.99 | 21.02 |
| MODEL.PDB | O, B.LYS_417   | ND2, B.ASN_422 | HD21, B.ASN_422 | 2.95 | 2.04 | 21.43 |
| MODEL.PDB | O, B.ARG_454   | ND2, B.ASN_422 | HD22, B.ASN_422 | 2.94 | 2.01 | 18.80 |
| MODEL.PDB | O, B.ILE_418   | N, B.TYR_423   | H, B.TYR_423    | 2.79 | 1.84 | 15.89 |
| MODEL.PDB | OD2, B.ASP_398 | OH, B.TYR_423  | HH, B.TYR_423   | 2.64 | 1.73 | 15.03 |
| MODEL.PDB | OD1, B.ASN_460 | NZ, B.LYS_424  | HZ2, B.LYS_424  | 2.64 | 1.68 | 12.99 |
| MODEL.PDB | OD1, B.ASP_428 | N, B.PHE_429   | H, B.PHE_429    | 2.76 | 1.87 | 23.57 |
| MODEL.PDB | O, B.LYS_378   | N, B.VAL_433   | H, B.VAL_433    | 2.76 | 1.78 | 10.96 |
| MODEL.PDB | O, B.ARG_509   | N, B.TRP_436   | H, B.TRP_436    | 2.96 | 2.00 | 14.46 |
| MODEL.PDB | OE1, B.GLN_506 | ND2, B.ASN_437 | HD22, B.ASN_437 | 2.76 | 1.76 | 7.71  |
| MODEL.PDB | OD2, B.ASP_442 | OG, B.SER_438  | HG, B.SER_438   | 2.68 | 1.74 | 9.15  |
| MODEL.PDB | OD1, B.ASN_437 | N, B.ASN_439   | H, B.ASN_439    | 2.86 | 1.86 | 8.85  |
| MODEL.PDB | O, B.SER_438   | N, B.ASP_442   | H, B.ASP_442    | 2.81 | 1.85 | 14.24 |
| MODEL.PDB | O, B.ASN_439   | OG, B.SER_443  | HG, B.SER_443   | 3.00 | 2.04 | 2.32  |
| MODEL.PDB | OD1, B.ASN_440 | NZ, B.LYS_444  | HZ1, B.LYS_444  | 2.69 | 1.88 | 29.21 |
| MODEL.PDB | OD2, B.ASP_442 | OH, B.TYR_451  | HH, B.TYR_451   | 2.68 | 1.72 | 0.75  |
| MODEL.PDB | OG, B.SER_349  | N, B.LEU_452   | H, B.LEU_452    | 2.95 | 2.13 | 29.55 |
| MODEL.PDB | O, B.GLN_493   | N, B.TYR_453   | H, B.TYR_453    | 2.76 | 1.77 | 9.91  |
| MODEL.PDB | OD1, B.ASN_422 | N, B.ARG_454   | H, B.ARG_454    | 2.70 | 1.76 | 16.69 |
| MODEL.PDB | O, B.PRO_491   | N, B.LEU_455   | H, B.LEU_455    | 2.73 | 1.75 | 10.97 |
| MODEL.PDB | OD1, B.ASP_420 | ND2, B.ASN_460 | HD21, B.ASN_460 | 2.68 | 1.79 | 21.99 |
| MODEL.PDB | O, B.TYR_489   | N, B.TYR_473   | H, B.TYR_473    | 2.99 | 2.14 | 26.94 |
| MODEL.PDB | O, B.SER_477   | OG1, B.THR_478 | HG1, B.THR_478  | 2.84 | 2.04 | 27.32 |
| MODEL.PDB | O, B.GLY_485   | N, B.CYS_488   | H, B.CYS_488    | 2.86 | 1.86 | 5.52  |
| MODEL.PDB | OD1, B.ASN_487 | OH, B.TYR_489  | HH, B.TYR_489   | 2.67 | 1.80 | 20.09 |
| MODEL.PDB | O, B.TYR_453   | N, B.GLN_493   | H, B.GLN_493    | 2.76 | 1.86 | 21.87 |
| MODEL.PDB | O, B.TYR_449   | OG, B.SER_494  | HG, B.SER_494   | 2.98 | 2.19 | 29.01 |
| MODEL.PDB | O, B.TYR_451   | N, B.TYR_495   | H, B.TYR_495    | 2.79 | 1.78 | 4.96  |
| MODEL.PDB | O, B.ASN_448   | N, B.PHE_497   | H, B.PHE_497    | 2.88 | 1.91 | 13.40 |
| MODEL.PDB | O, B.ILE_402   | N, B.TYR_508   | H, B.TYR_508    | 2.70 | 1.70 | 5.53  |
| MODEL.PDB | O, B.TRP_436   | N, B.ARG_509   | H, B.ARG_509    | 2.82 | 1.92 | 21.88 |
| MODEL.PDB | OD1, B.ASP_442 | NH1, B.ARG_509 | HH11, B.ARG_509 | 2.67 | 1.81 | 24.93 |
| MODEL.PDB | O, B.PHE_400   | N, B.VAL_510   | H, B.VAL_510    | 2.87 | 1.89 | 11.62 |
| MODEL.PDB | O, B.ILE_434   | N, B.VAL_511   | H, B.VAL_511    | 2.87 | 1.94 | 17.81 |
| MODEL.PDB | O, B.ASP_398   | N, B.VAL_512   | H, B.VAL_512    | 2.77 | 1.81 | 13.60 |
| MODEL.PDB | O, B.CYS_432   | N, B.LEU_513   | H, B.LEU_513    | 2.82 | 1.86 | 14.37 |
| MODEL.PDB | O, B.TYR_396   | N, B.SER_514   | H, B.SER_514    | 2.90 | 1.91 | 9.86  |
| MODEL.PDB | O, B.PHE_392   | N, B.THR_523   | H, B.THR_523    | 2.96 | 2.03 | 19.55 |
| MODEL.PDB | O, B.THR_393   | OG1, B.THR_523 | HG1, B.THR_523  | 2.62 | 1.71 | 16.03 |
| MODEL.PDB | OD2, B.ASP_389 | NZ, B.LYS_528  | HZ3, B.LYS_528  | 2.66 | 1.77 | 22.25 |
| MODEL.PDB | OD1, B.ASN_532 | N, B.LEU_533   | H, B.LEU_533    | 2.81 | 1.94 | 24.59 |
| MODEL.PDB | OE2, B.GLU_554 | NZ, B.LYS_535  | HZ3, B.LYS_535  | 2.58 | 1.58 | 6.75  |
| MODEL.PDB | O, B.LEU_552   | N, B.ASN_536   | H, B.ASN_536    | 2.81 | 1.82 | 7.48  |
| MODEL.PDB | O, B.GLY_550   | N, B.VAL_539   | H, B.VAL_539    | 2.96 | 1.97 | 8.57  |
| MODEL.PDB | O, B.GLY_548   | N, B.PHE_541   | H, B.PHE_541    | 2.79 | 1.80 | 9.02  |
| MODEL.PDB | O, B.ILE_326   | N, B.ASN_542   | H, B.ASN_542    | 2.82 | 1.81 | 1.58  |
| MODEL.PDB | O, B.LEU_546   | N, B.PHE_543   | H, B.PHE_543    | 2.76 | 1.87 | 23.13 |
| MODEL.PDB | O, B.PHE_543   | N, B.LEU_546   | H, B.LEU_546    | 2.95 | 2.00 | 16.40 |
| MODEL.PDB | O, B.THR_588   | N, B.VAL_551   | H, B.VAL_551    | 2.86 | 1.86 | 6.80  |
| MODEL.PDB | O, B.ILE_584   | OG, B.SER_555  | HG, B.SER_555   | 2.72 | 1.91 | 26.62 |
| MODEL.PDB | OD2, B.ASP_586 | NZ, B.LYS_557  | HZ3, B.LYS_557  | 2.63 | 1.78 | 26.14 |
| MODEL.PDB | OE1, B.GLN_563 | N, B.LEU_560   | H, B.LEU_560    | 2.87 | 2.05 | 29.35 |
| MODEL.PDB | O, B.ALA_575   | N, B.GLY_566   | H, B.GLY_566    | 2.80 | 1.81 | 8.86  |

|           |                |                |                 |      |      |       |
|-----------|----------------|----------------|-----------------|------|------|-------|
| MODEL.PDB | OD1, B_ASP_574 | N, B_ASP_568   | H, B_ASP_568    | 2.69 | 1.70 | 7.58  |
| MODEL.PDB | O, B_GLN_563   | NH2, B_ARG_577 | HH21, B_ARG_577 | 2.68 | 1.83 | 26.18 |
| MODEL.PDB | O, B_LEU_560   | NH2, B_ARG_577 | HH22, B_ARG_577 | 2.71 | 1.75 | 13.66 |
| MODEL.PDB | O, B_GLU_583   | N, B_ASP_578   | H, B_ASP_578    | 2.85 | 1.88 | 12.76 |
| MODEL.PDB | OD1, B_ASP_578 | N, B_THR_581   | H, B_THR_581    | 2.86 | 2.01 | 27.04 |
| MODEL.PDB | OD1, B_ASP_578 | N, B_LEU_582   | H, B_LEU_582    | 2.73 | 1.90 | 28.03 |
| MODEL.PDB | OE1, B_GLU_583 | N, B_ILE_584   | H, B_ILE_584    | 2.88 | 2.00 | 24.69 |
| MODEL.PDB | O, B_THR_553   | N, B_ASP_586   | H, B_ASP_586    | 2.83 | 1.84 | 10.38 |
| MODEL.PDB | O, B_ASP_574   | N, B_ILE_587   | H, B_ILE_587    | 2.76 | 1.75 | 4.59  |
| MODEL.PDB | OE1, B_GLU_619 | OG, B_SER_591  | HG, B_SER_591   | 2.62 | 1.73 | 18.48 |
| MODEL.PDB | O, B_SER_316   | N, B_VAL_595   | H, B_VAL_595    | 2.87 | 1.86 | 1.12  |
| MODEL.PDB | O, B_LEU_611   | N, B_SER_596   | H, B_SER_596    | 2.93 | 1.92 | 2.05  |
| MODEL.PDB | O, B_TYR_313   | N, B_VAL_597   | H, B_VAL_597    | 2.83 | 1.84 | 9.20  |
| MODEL.PDB | O, B_ALA_609   | N, B_ILE_598   | H, B_ILE_598    | 2.78 | 1.78 | 4.93  |
| MODEL.PDB | O, B_VAL_308   | N, B_THR_602   | H, B_THR_602    | 2.86 | 1.92 | 16.77 |
| MODEL.PDB | O, B_ILE_598   | N, B_ALA_609   | H, B_ALA_609    | 2.97 | 1.97 | 2.92  |
| MODEL.PDB | O, B_SER_596   | N, B_LEU_611   | H, B_LEU_611    | 2.72 | 1.73 | 8.98  |
| MODEL.PDB | O, B_CYS_649   | N, B_TYR_612   | H, B_TYR_612    | 2.84 | 1.83 | 5.58  |
| MODEL.PDB | O, B_ALA_647   | N, B_ASP_614   | H, B_ASP_614    | 2.90 | 1.92 | 11.84 |
| MODEL.PDB | OD1, B_ASN_616 | N, B_CYS_617   | H, B_CYS_617    | 2.85 | 1.94 | 20.77 |
| MODEL.PDB | ND1, B_HIS_625 | N, B_ALA_626   | H, B_ALA_626    | 2.86 | 1.92 | 17.37 |
| MODEL.PDB | OG1, B_THR_632 | NE, B_ARG_634  | HE, B_ARG_634   | 2.87 | 1.95 | 20.06 |
| MODEL.PDB | O, B_SER_637   | OG1, B_THR_638 | HG1, B_THR_638  | 2.58 | 1.66 | 13.61 |
| MODEL.PDB | O, B_LEU_650   | N, B_PHE_643   | H, B_PHE_643    | 2.86 | 1.89 | 11.47 |
| MODEL.PDB | OD2, B_ASP_614 | NH1, B_ARG_646 | HH12, B_ARG_646 | 2.84 | 1.93 | 20.79 |
| MODEL.PDB | O, B_PHE_643   | N, B_LEU_650   | H, B_LEU_650    | 2.79 | 1.78 | 0.13  |
| MODEL.PDB | O, B_VAL_610   | N, B_ILE_651   | H, B_ILE_651    | 2.82 | 1.81 | 2.67  |
| MODEL.PDB | O, B_ILE_692   | N, B_GLU_654   | H, B_GLU_654    | 2.81 | 1.82 | 9.58  |
| MODEL.PDB | OE2, B_GLU_654 | N, B_HIS_655   | H, B_HIS_655    | 2.78 | 1.90 | 23.29 |
| MODEL.PDB | O, B_ALA_694   | N, B_VAL_656   | H, B_VAL_656    | 2.96 | 2.02 | 17.75 |
| MODEL.PDB | O, B_THR_696   | OG, B_SER_659  | HG, B_SER_659   | 2.72 | 1.93 | 28.63 |
| MODEL.PDB | OE1, B_GLU_661 | N, B_CYS_662   | H, B_CYS_662    | 2.86 | 2.05 | 29.83 |
| MODEL.PDB | O, B_ILE_670   | N, B_ILE_666   | H, B_ILE_666    | 2.98 | 2.09 | 23.24 |
| MODEL.PDB | O, C_PRO_863   | N, B_ALA_668   | H, B_ALA_668    | 2.82 | 1.84 | 9.55  |
| MODEL.PDB | O, C_LEU_864   | N, B_GLY_669   | H, B_GLY_669    | 2.81 | 1.90 | 20.41 |
| MODEL.PDB | O, B_ILE_664   | N, B_ALA_672   | H, B_ALA_672    | 2.81 | 1.85 | 14.70 |
| MODEL.PDB | OH, B_TYR_695  | N, B_SER_673   | H, B_SER_673    | 2.96 | 2.09 | 24.82 |
| MODEL.PDB | O, B_GLN_677   | N, B_SER_680   | H, B_SER_680    | 2.87 | 1.88 | 9.34  |
| MODEL.PDB | O, B_VAL_687   | NE, B_ARG_685  | HE, B_ARG_685   | 2.86 | 1.99 | 25.09 |
| MODEL.PDB | O, B_VAL_687   | NH1, B_ARG_685 | HH11, B_ARG_685 | 2.75 | 1.91 | 27.04 |
| MODEL.PDB | O, B_SER_691   | N, B_ALA_688   | H, B_ALA_688    | 2.76 | 1.81 | 15.69 |
| MODEL.PDB | O, B_ALA_688   | N, B_SER_691   | H, B_SER_691    | 2.95 | 2.09 | 26.04 |
| MODEL.PDB | O, B_GLU_654   | N, B_ALA_694   | H, B_ALA_694    | 2.77 | 1.83 | 16.90 |
| MODEL.PDB | O, B_GLY_669   | N, B_MET_697   | H, B_MET_697    | 2.77 | 1.77 | 5.38  |
| MODEL.PDB | O, B_TYR_660   | N, B_SER_698   | H, B_SER_698    | 2.65 | 1.65 | 3.25  |
| MODEL.PDB | OD1, B_ASN_710 | OG, B_SER_708  | HG, B_SER_708   | 2.65 | 1.81 | 23.38 |
| MODEL.PDB | OD2, C_ASP_796 | ND2, B_ASN_709 | HD21, B_ASN_709 | 2.69 | 1.82 | 25.22 |
| MODEL.PDB | OD1, B_ASN_717 | N, B_PHE_718   | H, B_PHE_718    | 2.92 | 2.03 | 23.25 |
| MODEL.PDB | OE1, B_GLN_926 | N, B_ILE_720   | H, B_ILE_720    | 2.80 | 1.80 | 6.25  |
| MODEL.PDB | N, B_MET_731   | OG, B_SER_730  | HG, B_SER_730   | 2.89 | 2.10 | 29.05 |
| MODEL.PDB | OG1, B_THR_734 | OG1, B_THR_732 | HG1, B_THR_732  | 2.80 | 2.02 | 29.06 |
| MODEL.PDB | OD2, B_ASP_775 | NZ, B_LYS_733  | HZ1, B_LYS_733  | 2.58 | 1.59 | 8.03  |
| MODEL.PDB | O, B_THR_859   | N, B_SER_735   | H, B_SER_735    | 2.81 | 1.81 | 5.47  |
| MODEL.PDB | O, B_GLY_857   | N, B_ASP_737   | H, B_ASP_737    | 2.79 | 1.84 | 16.33 |
| MODEL.PDB | OD1, B_ASP_737 | N, B_MET_740   | H, B_MET_740    | 2.88 | 1.87 | 5.67  |
| MODEL.PDB | O, B_CYS_738   | N, B_ILE_742   | H, B_ILE_742    | 2.74 | 1.74 | 8.23  |
| MODEL.PDB | O, B_THR_739   | N, B_CYS_743   | H, B_CYS_743    | 2.86 | 1.93 | 19.00 |
| MODEL.PDB | O, B_THR_747   | OG, B_SER_750  | HG, B_SER_750   | 2.98 | 2.08 | 16.33 |

|           |                |                |                 |      |      |       |
|-----------|----------------|----------------|-----------------|------|------|-------|
| MODEL.PDB | O, B.LEU.753   | N, B.TYR.756   | H, B.TYR.756    | 2.91 | 1.95 | 13.71 |
| MODEL.PDB | O, B.SER.758   | N, B.GLN.762   | H, B.GLN.762    | 3.00 | 2.01 | 9.83  |
| MODEL.PDB | O, B.CYS.760   | N, B.ASN.764   | H, B.ASN.764    | 2.89 | 1.90 | 7.19  |
| MODEL.PDB | O, B.THR.761   | N, B.ARG.765   | H, B.ARG.765    | 2.98 | 2.02 | 14.57 |
| MODEL.PDB | O, B.ASN.764   | N, B.THR.768   | H, B.THR.768    | 2.91 | 1.94 | 12.25 |
| MODEL.PDB | O, B.ASN.764   | OG1, B.THR.768 | HG1, B.THR.768  | 2.97 | 2.06 | 15.36 |
| MODEL.PDB | O, B.ARG.765   | N, B.GLY.769   | H, B.GLY.769    | 2.85 | 1.86 | 10.66 |
| MODEL.PDB | O, B.ILE.770   | N, B.GLN.774   | H, B.GLN.774    | 2.93 | 2.01 | 20.08 |
| MODEL.PDB | O, B.GLU.773   | N, B.ASN.777   | H, B.ASN.777    | 2.79 | 1.84 | 15.71 |
| MODEL.PDB | O, B.LYS.776   | N, B.GLU.780   | H, B.GLU.780    | 2.79 | 1.84 | 16.37 |
| MODEL.PDB | O, B.GLN.779   | N, B.ALA.783   | H, B.ALA.783    | 2.96 | 2.03 | 18.63 |
| MODEL.PDB | O, B.VAL.781   | NE2, B.GLN.784 | HE21, B.GLN.784 | 2.85 | 1.91 | 17.39 |
| MODEL.PDB | O, A.ALA.701   | N, B.ILE.788   | H, B.ILE.788    | 2.81 | 1.89 | 19.07 |
| MODEL.PDB | OE1, A.GLU.702 | NZ, B.LYS.790  | HZ2, B.LYS.790  | 2.57 | 1.72 | 25.91 |
| MODEL.PDB | OD1, B.ASP.796 | N, B.GLY.798   | H, B.GLY.798    | 2.97 | 2.03 | 17.56 |
| MODEL.PDB | OD1, B.ASN.928 | N, B.ASN.801   | H, B.ASN.801    | 2.73 | 1.76 | 12.36 |
| MODEL.PDB | OD1, B.ASN.801 | NE2, B.GLN.804 | HE21, B.GLN.804 | 2.93 | 1.97 | 14.52 |
| MODEL.PDB | OD1, B.ASP.820 | NE, B.ARG.815  | HE, B.ARG.815   | 2.83 | 1.98 | 26.93 |
| MODEL.PDB | OD1, B.ASP.820 | NH1, B.ARG.815 | HH11, B.ARG.815 | 2.70 | 1.79 | 20.55 |
| MODEL.PDB | OD1, B.ASP.867 | NH2, B.ARG.815 | HH21, B.ARG.815 | 2.92 | 2.02 | 21.93 |
| MODEL.PDB | OE1, B.GLU.819 | N, B.SER.816   | H, B.SER.816    | 2.89 | 1.89 | 5.29  |
| MODEL.PDB | OG, B.SER.816  | N, B.GLU.819   | H, B.GLU.819    | 2.97 | 1.98 | 10.31 |
| MODEL.PDB | O, B.SER.816   | N, B.ASP.820   | H, B.ASP.820    | 2.93 | 1.93 | 6.62  |
| MODEL.PDB | O, B.ILE.818   | N, B.LEU.822   | H, B.LEU.822    | 2.86 | 1.89 | 13.69 |
| MODEL.PDB | O, B.SER.939   | NZ, B.LYS.825  | HZ2, B.LYS.825  | 2.70 | 1.72 | 10.45 |
| MODEL.PDB | OE1, B.GLN.949 | N, B.THR.827   | H, B.THR.827    | 2.83 | 1.82 | 3.45  |
| MODEL.PDB | OD2, B.ASP.848 | N, B.ARG.847   | H, B.ARG.847    | 2.97 | 1.98 | 8.70  |
| MODEL.PDB | O, B.LEU.849   | N, B.CYS.851   | H, B.CYS.851    | 2.78 | 1.85 | 18.62 |
| MODEL.PDB | O, B.ASN.856   | N, B.LEU.858   | H, B.LEU.858    | 2.97 | 2.06 | 21.69 |
| MODEL.PDB | O, B.SER.735   | N, B.THR.859   | H, B.THR.859    | 2.83 | 1.82 | 3.32  |
| MODEL.PDB | OD2, A.ASP.614 | OG1, B.THR.859 | HG1, B.THR.859  | 2.98 | 2.16 | 26.02 |
| MODEL.PDB | O, B.LYS.733   | N, B.LEU.861   | H, B.LEU.861    | 2.91 | 1.90 | 2.20  |
| MODEL.PDB | OD1, B.ASP.775 | N, B.LEU.864   | H, B.LEU.864    | 2.75 | 1.76 | 9.72  |
| MODEL.PDB | O, B.ILE.844   | OG1, B.THR.866 | HG1, B.THR.866  | 2.77 | 2.00 | 29.97 |
| MODEL.PDB | O, B.THR.866   | N, B.ILE.870   | H, B.ILE.870    | 2.94 | 1.96 | 11.60 |
| MODEL.PDB | O, B.ASP.867   | N, B.ALA.871   | H, B.ALA.871    | 2.79 | 1.85 | 16.87 |
| MODEL.PDB | O, B.GLU.868   | N, B.GLN.872   | H, B.GLN.872    | 2.85 | 1.90 | 15.95 |
| MODEL.PDB | O, B.ILE.870   | N, B.THR.874   | H, B.THR.874    | 2.91 | 1.96 | 16.23 |
| MODEL.PDB | OE2, B.GLU.819 | OG1, B.THR.874 | HG1, B.THR.874  | 2.73 | 1.83 | 16.33 |
| MODEL.PDB | O, B.ALA.871   | N, B.SER.875   | H, B.SER.875    | 2.83 | 1.83 | 7.32  |
| MODEL.PDB | O, B.GLN.872   | N, B.ALA.876   | H, B.ALA.876    | 2.95 | 2.01 | 17.47 |
| MODEL.PDB | O, B.TYR.873   | N, B.LEU.877   | H, B.LEU.877    | 2.99 | 1.99 | 5.57  |
| MODEL.PDB | O, B.THR.874   | N, B.LEU.878   | H, B.LEU.878    | 2.90 | 1.95 | 15.92 |
| MODEL.PDB | O, B.SER.875   | N, B.ALA.879   | H, B.ALA.879    | 2.80 | 1.80 | 8.47  |
| MODEL.PDB | O, B.LEU.877   | N, B.THR.881   | H, B.THR.881    | 2.98 | 2.01 | 12.62 |
| MODEL.PDB | O, B.THR.887   | N, B.GLY.891   | H, B.GLY.891    | 2.90 | 1.90 | 6.42  |
| MODEL.PDB | O, B.THR.881   | NE2, B.GLN.901 | HE22, B.GLN.901 | 2.80 | 1.99 | 29.78 |
| MODEL.PDB | O, B.PHE.898   | N, B.MET.902   | H, B.MET.902    | 2.89 | 1.91 | 12.26 |
| MODEL.PDB | O, B.ALA.899   | N, B.ALA.903   | H, B.ALA.903    | 2.88 | 1.92 | 15.49 |
| MODEL.PDB | O, B.MET.902   | N, B.PHE.906   | H, B.PHE.906    | 2.83 | 1.85 | 11.89 |
| MODEL.PDB | O, B.TYR.904   | N, B.GLY.908   | H, B.GLY.908    | 2.77 | 1.81 | 15.60 |
| MODEL.PDB | O, B.ASN.907   | N, B.GLY.910   | H, B.GLY.910    | 2.97 | 2.05 | 19.90 |
| MODEL.PDB | O, B.ASN.914   | N, B.GLU.918   | H, B.GLU.918    | 2.92 | 1.91 | 2.07  |
| MODEL.PDB | O, B.GLY.798   | NE2, B.GLN.920 | HE21, B.GLN.920 | 2.96 | 2.03 | 18.49 |
| MODEL.PDB | O, B.GLN.920   | N, B.ALA.924   | H, B.ALA.924    | 2.88 | 1.88 | 6.38  |
| MODEL.PDB | O, B.LEU.922   | N, B.GLN.926   | H, B.GLN.926    | 2.88 | 1.91 | 12.43 |
| MODEL.PDB | O, B.ILE.923   | N, B.PHE.927   | H, B.PHE.927    | 2.99 | 2.01 | 10.10 |
| MODEL.PDB | O, B.ALA.924   | N, B.ASN.928   | H, B.ASN.928    | 2.92 | 1.94 | 10.79 |

|           |                |                |                 |      |      |       |
|-----------|----------------|----------------|-----------------|------|------|-------|
| MODEL.PDB | O, B_GLN_926   | N, B_ALA_930   | H, B_ALA_930    | 2.95 | 2.01 | 18.22 |
| MODEL.PDB | O, B_PHE_927   | N, B_ILE_931   | H, B_ILE_931    | 2.95 | 1.96 | 8.93  |
| MODEL.PDB | O, B_LYS_933   | N, B_SER_937   | H, B_SER_937    | 2.86 | 1.90 | 14.74 |
| MODEL.PDB | O, B_ILE_934   | N, B_LEU_938   | H, B_LEU_938    | 2.84 | 1.84 | 5.40  |
| MODEL.PDB | O, B_GLN_935   | N, B_SER_939   | H, B_SER_939    | 2.86 | 1.91 | 16.55 |
| MODEL.PDB | O, B_ASP_936   | N, B_SER_940   | H, B_SER_940    | 2.84 | 1.85 | 9.53  |
| MODEL.PDB | O, B_LEU_945   | N, B_LEU_948   | H, B_LEU_948    | 2.89 | 1.91 | 12.12 |
| MODEL.PDB | OD1, B_ASN_953 | NE2, B_GLN_949 | HE21, B_GLN_949 | 2.81 | 1.84 | 12.61 |
| MODEL.PDB | O, B_GLY_946   | N, B_ASP_950   | H, B_ASP_950    | 2.84 | 1.86 | 10.71 |
| MODEL.PDB | O, B_GLN_949   | N, B_ASN_953   | H, B_ASN_953    | 2.81 | 1.82 | 8.84  |
| MODEL.PDB | O, B_ASP_950   | N, B_GLN_954   | H, B_GLN_954    | 2.73 | 1.74 | 10.35 |
| MODEL.PDB | O, B_ASN_953   | N, B_GLN_957   | H, B_GLN_957    | 2.83 | 1.85 | 10.89 |
| MODEL.PDB | O, B_ALA_956   | N, B_ASN_960   | H, B_ASN_960    | 2.82 | 1.84 | 11.78 |
| MODEL.PDB | O, B_GLN_957   | N, B_THR_961   | H, B_THR_961    | 2.92 | 1.94 | 12.31 |
| MODEL.PDB | O, B_LEU_959   | N, B_VAL_963   | H, B_VAL_963    | 2.95 | 1.98 | 13.04 |
| MODEL.PDB | O, C_GLN_755   | N, B_PHE_970   | H, B_PHE_970    | 2.79 | 1.86 | 17.89 |
| MODEL.PDB | O, B_ASN_969   | N, B_ALA_972   | H, B_ALA_972    | 2.95 | 1.98 | 13.71 |
| MODEL.PDB | OE1, B_GLN_992 | N, B_ILE_973   | H, B_ILE_973    | 2.82 | 1.85 | 13.37 |
| MODEL.PDB | O, B_ASN_978   | N, B_SER_982   | H, B_SER_982    | 2.96 | 2.05 | 20.99 |
| MODEL.PDB | OD2, B_ASP_979 | NE, B_ARG_983  | HE, B_ARG_983   | 2.71 | 1.71 | 5.22  |
| MODEL.PDB | OD1, B_ASP_979 | NH2, B_ARG_983 | HH21, B_ARG_983 | 2.61 | 1.64 | 12.14 |
| MODEL.PDB | O, B_ASP_985   | N, B_ALA_989   | H, B_ALA_989    | 2.88 | 1.93 | 16.37 |
| MODEL.PDB | O, B_LYS_986   | N, B_GLU_990   | H, B_GLU_990    | 2.92 | 1.99 | 18.69 |
| MODEL.PDB | OE2, B_GLU_988 | NE2, B_GLN_992 | HE21, B_GLN_992 | 2.70 | 1.70 | 2.13  |
| MODEL.PDB | O, B_ALA_989   | N, B_ILE_993   | H, B_ILE_993    | 2.78 | 1.81 | 11.44 |
| MODEL.PDB | O, B_GLU_990   | N, B_ASP_994   | H, B_ASP_994    | 2.78 | 1.80 | 11.51 |
| MODEL.PDB | OD1, C_ASP_994 | NH1, B_ARG_995 | HH12, B_ARG_995 | 2.64 | 1.64 | 8.73  |
| MODEL.PDB | O, B_PHE_970   | NH2, B_ARG_995 | HH21, B_ARG_995 | 2.82 | 1.88 | 17.56 |
| MODEL.PDB | O, B_ILE_993   | N, B_ILE_997   | H, B_ILE_997    | 2.82 | 1.83 | 8.71  |
| MODEL.PDB | O, B_ASP_994   | N, B_THR_998   | H, B_THR_998    | 2.95 | 1.95 | 7.15  |
| MODEL.PDB | O, C_SER_60    | N, C_SER_31    | H, C_SER_31     | 2.75 | 1.76 | 9.01  |
| MODEL.PDB | O, C_GLY_219   | OG1, C_THR_33  | HG1, C_THR_33   | 2.62 | 1.76 | 21.23 |
| MODEL.PDB | O, C_PRO_217   | NH2, C_ARG_34  | HH21, C_ARG_34  | 2.77 | 1.86 | 19.83 |
| MODEL.PDB | O, C_GLY_283   | OH, C_TYR_38   | HH, C_TYR_38    | 2.94 | 2.07 | 20.40 |
| MODEL.PDB | O, B_PHE_565   | N, C_PHE_43    | H, C_PHE_43     | 2.83 | 1.82 | 3.14  |
| MODEL.PDB | O, C_PHE_275   | N, C_THR_51    | H, C_THR_51     | 2.97 | 1.98 | 7.47  |
| MODEL.PDB | OD2, C_ASP_53  | OG1, C_THR_51  | HG1, C_THR_51   | 2.80 | 2.01 | 28.71 |
| MODEL.PDB | O, C_SER_31    | N, C_PHE_59    | H, C_PHE_59     | 2.76 | 1.85 | 20.94 |
| MODEL.PDB | O, C_THR_29    | N, C_VAL_62    | H, C_VAL_62     | 2.91 | 1.93 | 10.93 |
| MODEL.PDB | O, C_VAL_267   | N, C_THR_63    | H, C_THR_63     | 2.90 | 1.93 | 13.24 |
| MODEL.PDB | O, C_TYR_265   | N, C_PHE_65    | H, C_PHE_65     | 2.83 | 1.83 | 5.20  |
| MODEL.PDB | O, C_THR_73    | OG, C_SER_71   | HG, C_SER_71    | 2.63 | 1.79 | 23.54 |
| MODEL.PDB | O, C_THR_76    | OG1, C_THR_73  | HG1, C_THR_73   | 2.80 | 1.86 | 7.69  |
| MODEL.PDB | OD2, C_ASP_138 | N, C_LYS_77    | H, C_LYS_77     | 2.83 | 1.96 | 24.89 |
| MODEL.PDB | O, C_LYS_77    | NH2, C_ARG_78  | HH21, C_ARG_78  | 2.65 | 1.70 | 15.27 |
| MODEL.PDB | O, C_ARG_78    | N, C_ASP_80    | H, C_ASP_80     | 2.99 | 2.11 | 23.88 |
| MODEL.PDB | O, C_PHE_238   | N, C_LEU_84    | H, C_LEU_84     | 2.77 | 1.77 | 5.40  |
| MODEL.PDB | O, C_ASN_87    | N, C_GLY_89    | H, C_GLY_89     | 2.80 | 1.93 | 24.56 |
| MODEL.PDB | O, C_GLY_268   | N, C_TYR_91    | H, C_TYR_91     | 2.80 | 1.85 | 16.61 |
| MODEL.PDB | O, C_PHE_192   | N, C_PHE_92    | H, C_PHE_92     | 2.90 | 1.90 | 5.12  |
| MODEL.PDB | OD1, C_ASP_253 | NZ, C_LYS_97   | HZ2, C_LYS_97   | 2.69 | 1.77 | 19.23 |
| MODEL.PDB | O, C_ASN_121   | NH1, C_ARG_102 | HH11, C_ARG_102 | 2.76 | 1.80 | 14.78 |
| MODEL.PDB | O, C_ILE_119   | N, C_TRP_104   | H, C_TRP_104    | 2.85 | 1.88 | 13.53 |
| MODEL.PDB | O, C_GLN_239   | N, C_ILE_105   | H, C_ILE_105    | 2.93 | 1.93 | 8.32  |
| MODEL.PDB | O, C_LEU_117   | N, C_PHE_106   | H, C_PHE_106    | 2.81 | 1.82 | 8.05  |
| MODEL.PDB | O, C_ARG_237   | N, C_GLY_107   | H, C_GLY_107    | 2.90 | 1.91 | 10.24 |
| MODEL.PDB | OE2, B_GLU_471 | NZ, C_LYS_113  | HZ1, C_LYS_113  | 2.68 | 1.73 | 15.31 |
| MODEL.PDB | O, C_PHE_106   | N, C_LEU_117   | H, C_LEU_117    | 2.74 | 1.80 | 17.34 |

|           |                |                |                 |      |      |       |
|-----------|----------------|----------------|-----------------|------|------|-------|
| MODEL.PDB | O, C_LYS_129   | N, C_LEU_118   | H, C_LEU_118    | 2.76 | 1.75 | 3.99  |
| MODEL.PDB | O, C_TRP_104   | N, C_ILE_119   | H, C_ILE_119    | 2.92 | 1.99 | 18.69 |
| MODEL.PDB | O, C_VAL_127   | N, C_VAL_120   | H, C_VAL_120    | 2.85 | 1.86 | 9.48  |
| MODEL.PDB | OD1, C_ASN_125 | ND2, C_ASN_122 | HD21, C_ASN_122 | 2.84 | 1.89 | 16.55 |
| MODEL.PDB | O, C_ASN_122   | N, C_THR_124   | H, C_THR_124    | 2.82 | 1.94 | 23.27 |
| MODEL.PDB | O, C_SER_172   | N, C_VAL_126   | H, C_VAL_126    | 2.89 | 1.93 | 14.70 |
| MODEL.PDB | O, C_LEU_118   | N, C_LYS_129   | H, C_LYS_129    | 2.84 | 1.84 | 6.56  |
| MODEL.PDB | OE2, C_GLU_169 | NZ, C_LYS_129  | HZ3, C_LYS_129  | 2.46 | 1.53 | 17.71 |
| MODEL.PDB | O, C_CYS_131   | N, C_PHE_133   | H, C_PHE_133    | 2.94 | 2.10 | 27.94 |
| MODEL.PDB | OD1, C_ASP_111 | N, C_PHE_135   | H, C_PHE_135    | 2.88 | 1.95 | 19.37 |
| MODEL.PDB | O, C_HIS_146   | N, C_ASN_149   | H, C_ASN_149    | 2.95 | 1.99 | 14.41 |
| MODEL.PDB | OE1, C_GLU_154 | NZ, C_LYS_150  | HZ3, C_LYS_150  | 2.61 | 1.79 | 28.77 |
| MODEL.PDB | O, C_VAL_159   | N, C_SER_161   | H, C_SER_161    | 2.87 | 2.06 | 29.95 |
| MODEL.PDB | O, C_GLU_180   | N, C_GLY_184   | H, C_GLY_184    | 2.88 | 1.91 | 13.23 |
| MODEL.PDB | OD1, C_ASN_185 | N, C_PHE_186   | H, C_PHE_186    | 2.64 | 1.76 | 24.15 |
| MODEL.PDB | O, C_PHE_92    | N, C_PHE_192   | H, C_PHE_192    | 2.74 | 1.77 | 13.27 |
| MODEL.PDB | O, C_VAL_90    | N, C_PHE_194   | H, C_PHE_194    | 2.96 | 1.96 | 5.15  |
| MODEL.PDB | OH, C_TYR_204  | NZ, C_LYS_195  | HZ2, C_LYS_195  | 2.89 | 1.88 | 6.24  |
| MODEL.PDB | O, C_ILE_233   | ND2, C_ASN_196 | HD22, C_ASN_196 | 2.84 | 1.98 | 26.20 |
| MODEL.PDB | O, C_TYR_200   | N, C_ILE_197   | H, C_ILE_197    | 2.93 | 1.92 | 4.38  |
| MODEL.PDB | O, C_ILE_197   | N, C_TYR_200   | H, C_TYR_200    | 2.84 | 1.91 | 17.89 |
| MODEL.PDB | O, C_LEU_229   | N, C_PHE_201   | H, C_PHE_201    | 2.81 | 1.82 | 10.62 |
| MODEL.PDB | OD2, C_ASP_228 | NZ, C_LYS_202  | HZ2, C_LYS_202  | 2.76 | 1.94 | 28.81 |
| MODEL.PDB | O, C_VAL_193   | N, C_TYR_204   | H, C_TYR_204    | 2.93 | 1.98 | 16.05 |
| MODEL.PDB | O, C_GLU_224   | N, C_SER_205   | H, C_SER_205    | 2.89 | 1.94 | 14.89 |
| MODEL.PDB | OE2, C_GLU_191 | OG1, C_THR_208 | HG1, C_THR_208  | 2.86 | 1.90 | 5.11  |
| MODEL.PDB | O, C_ILE_203   | N, C_LEU_226   | H, C_LEU_226    | 2.82 | 1.81 | 2.77  |
| MODEL.PDB | O, C_GLY_107   | N, C_ARG_237   | H, C_ARG_237    | 3.00 | 2.09 | 21.59 |
| MODEL.PDB | O, C_LEU_84    | N, C_PHE_238   | H, C_PHE_238    | 2.77 | 1.89 | 23.69 |
| MODEL.PDB | O, C_ILE_105   | N, C_GLN_239   | H, C_GLN_239    | 2.81 | 1.86 | 14.63 |
| MODEL.PDB | O, C_ASN_81    | NE2, C_GLN_239 | HE21, C_GLN_239 | 2.97 | 2.09 | 24.23 |
| MODEL.PDB | O, C_GLY_103   | N, C_LEU_241   | H, C_LEU_241    | 2.84 | 1.88 | 14.32 |
| MODEL.PDB | OE1, C_GLU_156 | NH1, C_ARG_246 | HH12, C_ARG_246 | 2.76 | 1.76 | 7.38  |
| MODEL.PDB | OE2, C_GLU_156 | NH2, C_ARG_246 | HH22, C_ARG_246 | 2.61 | 1.71 | 21.34 |
| MODEL.PDB | O, C_SER_255   | OG, C_SER_247  | HG, C_SER_247   | 2.85 | 1.91 | 7.40  |
| MODEL.PDB | OD1, C_ASN_99  | N, C_LEU_249   | H, C_LEU_249    | 2.95 | 1.96 | 10.13 |
| MODEL.PDB | O, C_GLY_184   | N, C_ASP_253   | H, C_ASP_253    | 2.93 | 2.00 | 18.63 |
| MODEL.PDB | O, C_SER_255   | N, C_GLY_257   | H, C_GLY_257    | 2.96 | 2.09 | 25.74 |
| MODEL.PDB | O, C_GLU_96    | N, C_ALA_264   | H, C_ALA_264    | 2.77 | 1.83 | 17.25 |
| MODEL.PDB | O, C_PHE_65    | N, C_TYR_265   | H, C_TYR_265    | 2.92 | 1.94 | 12.01 |
| MODEL.PDB | O, C_ALA_93    | N, C_TYR_266   | H, C_TYR_266    | 2.76 | 1.76 | 6.11  |
| MODEL.PDB | O, C_PHE_55    | N, C_GLN_271   | H, C_GLN_271    | 2.96 | 2.00 | 14.44 |
| MODEL.PDB | OD2, C_ASP_290 | NH2, C_ARG_273 | HH22, C_ARG_273 | 2.55 | 1.66 | 21.76 |
| MODEL.PDB | O, C_THR_51    | N, C_PHE_275   | H, C_PHE_275    | 2.93 | 1.93 | 8.43  |
| MODEL.PDB | O, C_HIS_49    | N, C_LEU_277   | H, C_LEU_277    | 2.76 | 1.75 | 5.61  |
| MODEL.PDB | O, C_ASP_287   | N, C_LYS_278   | H, C_LYS_278    | 2.95 | 1.94 | 6.11  |
| MODEL.PDB | O, C_THR_284   | N, C_ASN_280   | H, C_ASN_280    | 2.78 | 1.78 | 5.39  |
| MODEL.PDB | O, C_ASN_280   | N, C_GLY_283   | H, C_GLY_283    | 2.90 | 1.96 | 17.14 |
| MODEL.PDB | O, C_LYS_278   | N, C_THR_286   | H, C_THR_286    | 2.94 | 1.94 | 7.11  |
| MODEL.PDB | O, C_LEU_276   | N, C_VAL_289   | H, C_VAL_289    | 2.86 | 1.89 | 13.26 |
| MODEL.PDB | OD1, C_ASP_294 | N, C_LEU_296   | H, C_LEU_296    | 2.75 | 1.80 | 15.93 |
| MODEL.PDB | O, C_ASP_294   | N, C_GLU_298   | H, C_GLU_298    | 2.90 | 1.98 | 19.20 |
| MODEL.PDB | O, C_PRO_295   | N, C_THR_299   | H, C_THR_299    | 2.94 | 2.03 | 21.12 |
| MODEL.PDB | O, C_SER_297   | N, C_CYS_301   | H, C_CYS_301    | 2.99 | 2.02 | 14.63 |
| MODEL.PDB | O, C_GLU_298   | N, C_THR_302   | H, C_THR_302    | 2.78 | 1.81 | 13.04 |
| MODEL.PDB | O, C_THR_299   | N, C_LEU_303   | H, C_LEU_303    | 2.80 | 1.82 | 9.35  |
| MODEL.PDB | O, C_CYS_301   | NZ, C_LYS_304  | HZ1, C_LYS_304  | 2.67 | 1.68 | 9.78  |
| MODEL.PDB | O, C_THR_307   | OG, C_SER_305  | HG, C_SER_305   | 2.82 | 1.93 | 17.29 |

|           |                |                |                 |      |      |       |
|-----------|----------------|----------------|-----------------|------|------|-------|
| MODEL.PDB | O, C_ARG_685   | NZ, C_LYS_310  | HZ3, C_LYS_310  | 2.70 | 1.83 | 24.75 |
| MODEL.PDB | O, C_GLU_309   | OH, C_TYR_313  | HH, C_TYR_313   | 2.72 | 1.91 | 26.67 |
| MODEL.PDB | OE2, C_GLU_298 | OG1, C_THR_315 | HG1, C_THR_315  | 2.64 | 1.70 | 8.17  |
| MODEL.PDB | O, C_GLY_593   | N, C_PHE_318   | H, C_PHE_318    | 2.93 | 1.95 | 11.12 |
| MODEL.PDB | O, C_CYS_538   | N, C_THR_323   | H, C_THR_323    | 2.86 | 1.86 | 7.66  |
| MODEL.PDB | O, C_ASN_542   | N, C_ARG_328   | H, C_ARG_328    | 2.84 | 1.83 | 5.03  |
| MODEL.PDB | OE1, C_GLN_580 | NE, C_ARG_328  | HE, C_ARG_328   | 2.78 | 1.86 | 19.60 |
| MODEL.PDB | OD2, C_ASP_578 | NH1, C_ARG_328 | HH12, C_ARG_328 | 2.60 | 1.78 | 28.67 |
| MODEL.PDB | OE1, C_GLN_580 | NH2, C_ARG_328 | HH21, C_ARG_328 | 2.90 | 2.05 | 27.29 |
| MODEL.PDB | O, C_CYS_336   | N, C_PHE_338   | H, C_PHE_338    | 2.85 | 2.02 | 28.34 |
| MODEL.PDB | O, C_PHE_338   | N, C_VAL_341   | H, C_VAL_341    | 2.94 | 2.11 | 29.17 |
| MODEL.PDB | O, C_GLY_339   | N, C_ASN_343   | H, C_ASN_343    | 2.81 | 1.85 | 14.75 |
| MODEL.PDB | OD2, C_ASP_467 | OH, C_TYR_351  | HH, C_TYR_351   | 2.53 | 1.60 | 11.08 |
| MODEL.PDB | O, C_SER_399   | N, C_ASN_354   | H, C_ASN_354    | 2.98 | 2.02 | 15.21 |
| MODEL.PDB | OD1, C_ASP_398 | NE, C_ARG_355  | HE, C_ARG_355   | 2.62 | 1.64 | 10.97 |
| MODEL.PDB | OD2, C_ASP_398 | NH2, C_ARG_355 | HH21, C_ARG_355 | 2.58 | 1.57 | 3.27  |
| MODEL.PDB | O, C_VAL_395   | N, C_ILE_358   | H, C_ILE_358    | 2.79 | 1.80 | 7.71  |
| MODEL.PDB | OD1, C_ASN_394 | OG, C_SER_359  | HG, C_SER_359   | 2.97 | 2.15 | 25.84 |
| MODEL.PDB | O, C_ASN_334   | N, C_VAL_362   | H, C_VAL_362    | 2.71 | 1.78 | 18.56 |
| MODEL.PDB | O, C_CYS_525   | N, C_ALA_363   | H, C_ALA_363    | 2.77 | 1.77 | 6.71  |
| MODEL.PDB | OD1, C_ASP_364 | N, C_SER_366   | H, C_SER_366    | 2.74 | 1.81 | 19.19 |
| MODEL.PDB | OD1, C_ASP_364 | OG, C_SER_366  | HG, C_SER_366   | 2.68 | 1.81 | 20.57 |
| MODEL.PDB | O, C_TYR_365   | N, C_TYR_369   | H, C_TYR_369    | 2.89 | 1.95 | 18.35 |
| MODEL.PDB | O, C_ALA_435   | N, C_THR_376   | H, C_THR_376    | 2.96 | 1.97 | 8.80  |
| MODEL.PDB | OH, C_TYR_380  | NZ, C_LYS_378  | HZ3, C_LYS_378  | 2.93 | 1.99 | 17.96 |
| MODEL.PDB | O, A_ARG_983   | N, C_SER_383   | H, C_SER_383    | 2.91 | 1.90 | 2.08  |
| MODEL.PDB | O, C_VAL_524   | N, C_PHE_392   | H, C_PHE_392    | 2.76 | 1.77 | 8.68  |
| MODEL.PDB | O, C_GLU_516   | N, C_THR_393   | H, C_THR_393    | 2.81 | 1.85 | 15.38 |
| MODEL.PDB | O, C_ILE_358   | N, C_VAL_395   | H, C_VAL_395    | 2.96 | 1.96 | 7.50  |
| MODEL.PDB | O, C_SER_514   | N, C_TYR_396   | H, C_TYR_396    | 2.96 | 1.98 | 10.39 |
| MODEL.PDB | O, C_LYS_356   | N, C_ALA_397   | H, C_ALA_397    | 2.95 | 1.94 | 4.02  |
| MODEL.PDB | O, C_VAL_512   | N, C_ASP_398   | H, C_ASP_398    | 2.96 | 1.95 | 4.31  |
| MODEL.PDB | O, C_ASN_354   | N, C_SER_399   | H, C_SER_399    | 2.83 | 1.90 | 19.13 |
| MODEL.PDB | O, C_VAL_510   | N, C_PHE_400   | H, C_PHE_400    | 2.99 | 2.01 | 10.93 |
| MODEL.PDB | O, C_ALA_348   | N, C_VAL_401   | H, C_VAL_401    | 2.98 | 2.14 | 27.38 |
| MODEL.PDB | O, C_ASP_405   | NE, C_ARG_408  | HE, C_ARG_408   | 2.82 | 1.92 | 21.75 |
| MODEL.PDB | O, C_ASP_405   | NH1, C_ARG_408 | HH11, C_ARG_408 | 2.91 | 2.03 | 24.55 |
| MODEL.PDB | O, C_GLU_406   | N, C_GLN_409   | H, C_GLN_409    | 2.99 | 2.08 | 21.28 |
| MODEL.PDB | OD2, C_ASP_420 | N, C_GLY_416   | H, C_GLY_416    | 2.76 | 1.76 | 4.26  |
| MODEL.PDB | O, C_GLY_416   | N, C_ASP_420   | H, C_ASP_420    | 2.85 | 1.85 | 5.05  |
| MODEL.PDB | O, C_ILE_418   | N, C_ASN_422   | H, C_ASN_422    | 2.84 | 1.91 | 18.43 |
| MODEL.PDB | O, C_LYS_417   | ND2, C_ASN_422 | HD21, C_ASN_422 | 2.95 | 2.09 | 25.91 |
| MODEL.PDB | O, C_ARG_454   | ND2, C_ASN_422 | HD22, C_ASN_422 | 2.96 | 2.05 | 20.86 |
| MODEL.PDB | O, C_ILE_418   | N, C_TYR_423   | H, C_TYR_423    | 2.90 | 1.93 | 12.86 |
| MODEL.PDB | O, C_LEU_461   | NZ, C_LYS_424  | HZ1, C_LYS_424  | 2.82 | 2.00 | 28.66 |
| MODEL.PDB | OD1, C_ASN_460 | NZ, C_LYS_424  | HZ2, C_LYS_424  | 2.69 | 1.71 | 11.25 |
| MODEL.PDB | OD1, C_ASP_428 | N, C_PHE_429   | H, C_PHE_429    | 2.74 | 1.87 | 24.99 |
| MODEL.PDB | O, C_LYS_378   | N, C_VAL_433   | H, C_VAL_433    | 2.75 | 1.75 | 6.16  |
| MODEL.PDB | O, C_VAL_511   | N, C_ILE_434   | H, C_ILE_434    | 2.97 | 2.08 | 22.89 |
| MODEL.PDB | OD2, C_ASP_442 | OG, C_SER_438  | HG, C_SER_438   | 2.57 | 1.73 | 23.01 |
| MODEL.PDB | O, C_SER_438   | N, C_LEU_441   | H, C_LEU_441    | 2.95 | 1.96 | 8.73  |
| MODEL.PDB | O, C_SER_438   | N, C_ASP_442   | H, C_ASP_442    | 2.90 | 1.92 | 12.85 |
| MODEL.PDB | O, C_ASN_439   | OG, C_SER_443  | HG, C_SER_443   | 2.61 | 1.82 | 28.48 |
| MODEL.PDB | O, C_LYS_444   | N, C_GLY_447   | H, C_GLY_447    | 2.98 | 2.07 | 22.07 |
| MODEL.PDB | OD1, C_ASN_448 | N, C_ASN_450   | H, C_ASN_450    | 2.93 | 1.96 | 12.28 |
| MODEL.PDB | O, C_GLN_493   | N, C_TYR_453   | H, C_TYR_453    | 2.89 | 1.92 | 13.12 |
| MODEL.PDB | OD1, C_ASN_422 | N, C_ARG_454   | H, C_ARG_454    | 2.74 | 1.74 | 7.03  |
| MODEL.PDB | O, C_PRO_491   | N, C_LEU_455   | H, C_LEU_455    | 2.83 | 1.82 | 2.24  |

|           |                |                |                 |      |      |       |
|-----------|----------------|----------------|-----------------|------|------|-------|
| MODEL.PDB | O, C_PHE_490   | NH1, C_ARG_457 | HH11, C_ARG_457 | 2.86 | 1.92 | 18.01 |
| MODEL.PDB | O, C_PHE_456   | NH2, C_ARG_457 | HH21, C_ARG_457 | 2.95 | 2.01 | 17.42 |
| MODEL.PDB | OH, C_TYR_421  | N, C_SER_459   | H, C_SER_459    | 2.92 | 1.96 | 13.91 |
| MODEL.PDB | OD1, C_ASP_420 | ND2, C_ASN_460 | HD22, C_ASN_460 | 2.79 | 1.85 | 17.42 |
| MODEL.PDB | OE2, C_GLU_465 | N, C_LYS_462   | H, C_LYS_462    | 2.96 | 1.95 | 1.74  |
| MODEL.PDB | O, C_ALA_352   | NH1, C_ARG_466 | HH12, C_ARG_466 | 2.71 | 1.78 | 17.54 |
| MODEL.PDB | OD1, C_ASP_467 | N, C_SER_469   | H, C_SER_469    | 2.85 | 1.87 | 11.33 |
| MODEL.PDB | OD1, C_ASP_467 | OG, C_SER_469  | HG, C_SER_469   | 2.78 | 1.89 | 17.62 |
| MODEL.PDB | OE1, C_GLN_474 | OH, C_TYR_489  | HH, C_TYR_489   | 2.76 | 1.82 | 9.42  |
| MODEL.PDB | O, C_TYR_453   | N, C_GLN_493   | H, C_GLN_493    | 2.75 | 1.78 | 12.98 |
| MODEL.PDB | O, C_SER_494   | NE2, C_GLN_493 | HE21, C_GLN_493 | 2.89 | 1.89 | 5.58  |
| MODEL.PDB | O, C_TYR_451   | N, C_TYR_495   | H, C_TYR_495    | 2.84 | 1.85 | 10.31 |
| MODEL.PDB | O, C_ASN_448   | N, C_PHE_497   | H, C_PHE_497    | 2.83 | 1.94 | 22.51 |
| MODEL.PDB | O, C_ILE_402   | N, C_TYR_508   | H, C_TYR_508    | 2.92 | 1.93 | 10.25 |
| MODEL.PDB | O, C_TRP_436   | N, C_ARG_509   | H, C_ARG_509    | 2.93 | 2.11 | 29.53 |
| MODEL.PDB | OD1, C_ASP_442 | NH1, C_ARG_509 | HH11, C_ARG_509 | 2.58 | 1.62 | 14.24 |
| MODEL.PDB | O, C_PHE_400   | N, C_VAL_510   | H, C_VAL_510    | 2.83 | 1.83 | 4.85  |
| MODEL.PDB | O, C_ASP_398   | N, C_VAL_512   | H, C_VAL_512    | 2.98 | 2.00 | 12.14 |
| MODEL.PDB | O, C_CYS_432   | N, C_LEU_513   | H, C_LEU_513    | 2.91 | 1.92 | 10.29 |
| MODEL.PDB | O, C_TYR_396   | N, C_SER_514   | H, C_SER_514    | 2.85 | 1.85 | 7.11  |
| MODEL.PDB | O, C_PHE_392   | N, C_THR_523   | H, C_THR_523    | 2.78 | 1.77 | 1.47  |
| MODEL.PDB | O, C_PHE_392   | N, C_VAL_524   | H, C_VAL_524    | 2.84 | 1.84 | 7.50  |
| MODEL.PDB | O, C_VAL_327   | N, C_THR_531   | H, C_THR_531    | 2.96 | 2.00 | 14.18 |
| MODEL.PDB | OE1, C_GLU_554 | NZ, C_LYS_535  | HZ3, C_LYS_535  | 2.65 | 1.79 | 24.99 |
| MODEL.PDB | OE2, C_GLU_554 | NZ, C_LYS_535  | HZ3, C_LYS_535  | 2.72 | 1.89 | 27.95 |
| MODEL.PDB | O, C_LEU_552   | N, C_ASN_536   | H, C_ASN_536    | 2.83 | 1.84 | 8.37  |
| MODEL.PDB | OE2, C_GLU_324 | NZ, C_LYS_537  | HZ3, C_LYS_537  | 2.54 | 1.67 | 24.70 |
| MODEL.PDB | O, C_GLY_550   | N, C_VAL_539   | H, C_VAL_539    | 2.99 | 2.00 | 10.70 |
| MODEL.PDB | O, C_GLY_548   | N, C_PHE_541   | H, C_PHE_541    | 2.93 | 1.94 | 8.02  |
| MODEL.PDB | O, C_ILE_326   | N, C_ASN_542   | H, C_ASN_542    | 2.98 | 2.01 | 12.93 |
| MODEL.PDB | O, C_LEU_546   | N, C_PHE_543   | H, C_PHE_543    | 2.98 | 2.00 | 12.02 |
| MODEL.PDB | O, C_ALA_522   | ND2, C_ASN_544 | HD22, C_ASN_544 | 2.88 | 1.87 | 4.17  |
| MODEL.PDB | OD1, C_ASN_542 | N, C_GLY_545   | H, C_GLY_545    | 2.95 | 2.04 | 21.14 |
| MODEL.PDB | O, C_PHE_543   | N, C_LEU_546   | H, C_LEU_546    | 2.91 | 1.92 | 9.15  |
| MODEL.PDB | OD2, A_ASP_745 | OG1, C_THR_549 | HG1, C_THR_549  | 2.94 | 2.12 | 25.69 |
| MODEL.PDB | O, C_THR_588   | N, C_VAL_551   | H, C_VAL_551    | 2.81 | 1.80 | 4.39  |
| MODEL.PDB | O, C_ILE_584   | N, C_SER_555   | H, C_SER_555    | 2.94 | 1.99 | 16.70 |
| MODEL.PDB | OD1, C_ASP_586 | OG, C_SER_555  | HG, C_SER_555   | 2.61 | 1.67 | 9.67  |
| MODEL.PDB | OD2, C_ASP_574 | NZ, C_LYS_557  | HZ3, C_LYS_557  | 2.58 | 1.76 | 27.92 |
| MODEL.PDB | O, C_ALA_575   | N, C_GLY_566   | H, C_GLY_566    | 2.84 | 1.87 | 13.47 |
| MODEL.PDB | O, A_PHE_43    | N, C_ARG_567   | H, C_ARG_567    | 2.91 | 1.94 | 12.53 |
| MODEL.PDB | O, C_ILE_569   | OG1, C_THR_572 | HG1, C_THR_572  | 2.80 | 1.89 | 13.83 |
| MODEL.PDB | O, C_LEU_585   | N, C_VAL_576   | H, C_VAL_576    | 2.93 | 1.96 | 11.99 |
| MODEL.PDB | O, C_GLN_564   | N, C_ARG_577   | H, C_ARG_577    | 2.95 | 1.94 | 1.92  |
| MODEL.PDB | O, C_GLN_563   | NE, C_ARG_577  | HE, C_ARG_577   | 2.88 | 2.06 | 29.54 |
| MODEL.PDB | O, C_GLN_563   | NH2, C_ARG_577 | HH21, C_ARG_577 | 2.73 | 1.86 | 25.33 |
| MODEL.PDB | OD1, C_ASP_578 | N, C_THR_581   | H, C_THR_581    | 2.66 | 1.70 | 14.58 |
| MODEL.PDB | O, C_VAL_576   | N, C_LEU_585   | H, C_LEU_585    | 2.94 | 1.97 | 13.37 |
| MODEL.PDB | O, C_THR_553   | N, C_ASP_586   | H, C_ASP_586    | 2.90 | 2.06 | 28.07 |
| MODEL.PDB | O, C_ASP_574   | N, C_ILE_587   | H, C_ILE_587    | 2.65 | 1.66 | 9.43  |
| MODEL.PDB | O, C_SER_316   | N, C_VAL_595   | H, C_VAL_595    | 2.92 | 1.92 | 3.30  |
| MODEL.PDB | O, C_LEU_611   | N, C_SER_596   | H, C_SER_596    | 2.89 | 1.90 | 10.46 |
| MODEL.PDB | O, C_TYR_313   | N, C_VAL_597   | H, C_VAL_597    | 2.90 | 1.91 | 11.17 |
| MODEL.PDB | O, C_ALA_609   | N, C_ILE_598   | H, C_ILE_598    | 2.76 | 1.80 | 13.17 |
| MODEL.PDB | O, C_ILE_651   | N, C_VAL_610   | H, C_VAL_610    | 2.81 | 1.80 | 1.72  |
| MODEL.PDB | O, C_SER_596   | N, C_LEU_611   | H, C_LEU_611    | 2.72 | 1.72 | 4.81  |
| MODEL.PDB | O, C_GLY_594   | N, C_GLN_613   | H, C_GLN_613    | 2.89 | 1.91 | 11.46 |
| MODEL.PDB | O, C_ALA_647   | N, C_ASP_614   | H, C_ASP_614    | 2.81 | 1.82 | 6.96  |



|           |                |                |                 |      |      |       |
|-----------|----------------|----------------|-----------------|------|------|-------|
| MODEL.PDB | O, C_ASP.627   | NE2, C_GLN.628 | HE21, C_GLN.628 | 2.82 | 1.92 | 21.92 |
| MODEL.PDB | O, C_GLN.628   | N, C_THR.630   | H, C_THR.630    | 2.76 | 1.84 | 18.98 |
| MODEL.PDB | O, C_GLU.619   | NH2, C_ARG.634 | HH21, C_ARG.634 | 2.74 | 1.90 | 27.43 |
| MODEL.PDB | OD2, C_ASP.294 | OG, C_SER.637  | HG, C_SER.637   | 2.56 | 1.75 | 25.96 |
| MODEL.PDB | O, C_LEU.650   | N, C_PHE.643   | H, C_PHE.643    | 2.81 | 1.92 | 22.91 |
| MODEL.PDB | O, C_GLY.648   | OG1, C_THR.645 | HG1, C_THR.645  | 2.71 | 1.80 | 15.84 |
| MODEL.PDB | OD2, A_ASP.848 | NH2, C_ARG.646 | HH22, C_ARG.646 | 2.63 | 1.79 | 27.55 |
| MODEL.PDB | O, C_PHE.643   | N, C_LEU.650   | H, C_LEU.650    | 2.73 | 1.75 | 9.99  |
| MODEL.PDB | O, C_VAL.610   | N, C_ILE.651   | H, C_ILE.651    | 2.78 | 1.80 | 10.59 |
| MODEL.PDB | O, C_ASN.641   | N, C_GLY.652   | H, C_GLY.652    | 2.79 | 1.78 | 1.50  |
| MODEL.PDB | O, C_ILE.692   | N, C_GLU.654   | H, C_GLU.654    | 2.81 | 1.89 | 19.55 |
| MODEL.PDB | O, C_THR.696   | OG, C_SER.659  | HG, C_SER.659   | 2.86 | 2.07 | 28.50 |
| MODEL.PDB | O, C_THR.676   | OH, C_TYR.660  | HH, C_TYR.660   | 2.66 | 1.82 | 23.84 |
| MODEL.PDB | OE1, C_GLU.661 | N, C_CYS.662   | H, C_CYS.662    | 2.69 | 1.71 | 11.63 |
| MODEL.PDB | O, C_ILE.670   | N, C_ILE.666   | H, C_ILE.666    | 2.88 | 1.97 | 20.86 |
| MODEL.PDB | O, A_PRO.863   | N, C_ALA.668   | H, C_ALA.668    | 2.82 | 1.86 | 14.51 |
| MODEL.PDB | O, A_LEU.864   | N, C_GLY.669   | H, C_GLY.669    | 2.73 | 1.84 | 22.00 |
| MODEL.PDB | O, C_TYR.695   | N, C_CYS.671   | H, C_CYS.671    | 2.88 | 1.91 | 13.00 |
| MODEL.PDB | O, C_ILE.664   | N, C_ALA.672   | H, C_ALA.672    | 2.79 | 1.82 | 13.83 |
| MODEL.PDB | OD2, C_ASP.663 | OG, C_SER.673  | HG, C_SER.673   | 2.61 | 1.66 | 4.96  |
| MODEL.PDB | OG, C_SER.689  | OG1, C_THR.676 | HG1, C_THR.676  | 2.79 | 1.86 | 11.33 |
| MODEL.PDB | OE1, C_GLN.677 | ND2, C_ASN.679 | HD21, C_ASN.679 | 2.90 | 1.93 | 13.29 |
| MODEL.PDB | O, C_ASN.679   | NH1, C_ARG.683 | HH11, C_ARG.683 | 2.73 | 1.73 | 8.46  |
| MODEL.PDB | O, C_ALA.684   | NH2, C_ARG.685 | HH21, C_ARG.685 | 2.74 | 1.79 | 14.98 |
| MODEL.PDB | O, C_ALA.688   | N, C_SER.691   | H, C_SER.691    | 2.96 | 1.98 | 12.29 |
| MODEL.PDB | O, C_CYS.671   | N, C_TYR.695   | H, C_TYR.695    | 2.78 | 1.80 | 9.89  |
| MODEL.PDB | O, C_GLU.661   | OH, C_TYR.695  | HH, C_TYR.695   | 2.57 | 1.63 | 8.69  |
| MODEL.PDB | O, C_GLY.669   | N, C_MET.697   | H, C_MET.697    | 2.91 | 1.93 | 11.90 |
| MODEL.PDB | O, C_VAL.705   | N, C_TYR.707   | H, C_TYR.707    | 2.85 | 1.99 | 25.15 |
| MODEL.PDB | OD2, A_ASP.796 | ND2, C_ASN.709 | HD21, C_ASN.709 | 2.70 | 1.85 | 25.89 |
| MODEL.PDB | OD1, C_ASN.717 | N, C_PHE.718   | H, C_PHE.718    | 2.83 | 1.93 | 22.04 |
| MODEL.PDB | OE1, C_GLN.926 | N, C_ILE.720   | H, C_ILE.720    | 2.82 | 1.82 | 5.94  |
| MODEL.PDB | OD2, C_ASP.775 | NZ, C_LYS.733  | HZ3, C_LYS.733  | 2.58 | 1.60 | 11.03 |
| MODEL.PDB | O, C_THR.732   | N, C_THR.734   | H, C_THR.734    | 2.83 | 1.99 | 27.90 |
| MODEL.PDB | O, C_THR.859   | N, C_SER.735   | H, C_SER.735    | 3.00 | 2.04 | 15.40 |
| MODEL.PDB | O, C_GLY.857   | N, C_ASP.737   | H, C_ASP.737    | 2.74 | 1.76 | 10.16 |
| MODEL.PDB | O, C_ASP.737   | N, C_TYR.741   | H, C_TYR.741    | 2.84 | 1.88 | 14.81 |
| MODEL.PDB | O, C_CYS.738   | N, C_ILE.742   | H, C_ILE.742    | 3.00 | 2.01 | 9.31  |
| MODEL.PDB | O, C_THR.739   | N, C_CYS.743   | H, C_CYS.743    | 2.88 | 1.97 | 20.77 |
| MODEL.PDB | OE2, C_GLU.748 | OG1, C_THR.747 | HG1, C_THR.747  | 2.89 | 2.01 | 18.92 |
| MODEL.PDB | O, C_THR.747   | N, C_ASN.751   | H, C_ASN.751    | 2.94 | 1.97 | 14.54 |
| MODEL.PDB | O, C_CYS.749   | N, C_LEU.753   | H, C_LEU.753    | 2.92 | 1.96 | 15.41 |
| MODEL.PDB | O, C_SER.758   | N, C_GLN.762   | H, C_GLN.762    | 2.95 | 1.99 | 14.82 |
| MODEL.PDB | O, C_PHE.759   | N, C_LEU.763   | H, C_LEU.763    | 2.94 | 1.94 | 6.26  |
| MODEL.PDB | O, C_THR.761   | N, C_ARG.765   | H, C_ARG.765    | 2.87 | 1.91 | 13.67 |
| MODEL.PDB | O, C_ASN.764   | N, C_THR.768   | H, C_THR.768    | 2.93 | 1.94 | 11.17 |
| MODEL.PDB | O, C_ASN.764   | OG1, C_THR.768 | HG1, C_THR.768  | 2.97 | 2.07 | 16.22 |
| MODEL.PDB | O, C_ARG.765   | N, C_GLY.769   | H, C_GLY.769    | 2.89 | 1.90 | 8.91  |
| MODEL.PDB | O, C_LEU.767   | N, C_ALA.771   | H, C_ALA.771    | 2.92 | 1.96 | 15.95 |
| MODEL.PDB | O, C_GLU.773   | N, C_ASN.777   | H, C_ASN.777    | 2.85 | 1.90 | 15.65 |
| MODEL.PDB | O, C_LYS.776   | N, C_GLU.780   | H, C_GLU.780    | 2.74 | 1.75 | 8.57  |
| MODEL.PDB | O, C_GLN.779   | N, C_ALA.783   | H, C_ALA.783    | 2.87 | 1.93 | 18.26 |
| MODEL.PDB | O, B_ALA.701   | N, C_ILE.788   | H, C_ILE.788    | 2.78 | 1.81 | 13.05 |
| MODEL.PDB | O, B_ASN.703   | N, C_LYS.790   | H, C_LYS.790    | 2.96 | 1.97 | 9.28  |
| MODEL.PDB | OG, B_SER.704  | NZ, C_LYS.790  | HZ1, C_LYS.790  | 2.84 | 1.83 | 1.48  |
| MODEL.PDB | O, C_THR.791   | NZ, C_LYS.790  | HZ3, C_LYS.790  | 3.00 | 2.14 | 26.67 |
| MODEL.PDB | O, C_ASP.796   | N, C_GLY.798   | H, C_GLY.798    | 2.69 | 1.76 | 18.92 |
| MODEL.PDB | OD1, C_ASN.928 | N, C_ASN.801   | H, C_ASN.801    | 2.79 | 1.83 | 13.49 |

|           |                |                |                 |      |      |       |
|-----------|----------------|----------------|-----------------|------|------|-------|
| MODEL.PDB | OD1, C_ASN_801 | N, C_SER_803   | H, C_SER_803    | 2.98 | 2.00 | 12.86 |
| MODEL.PDB | O, C_LYS_811   | N, C_LYS_814   | H, C_LYS_814    | 2.88 | 1.98 | 22.49 |
| MODEL.PDB | OG, C_SER_816  | N, C_GLU_819   | H, C_GLU_819    | 2.87 | 1.89 | 10.14 |
| MODEL.PDB | O, C_SER_816   | N, C_ASP_820   | H, C_ASP_820    | 2.98 | 1.97 | 2.32  |
| MODEL.PDB | O, C_ILE_818   | N, C_LEU_822   | H, C_LEU_822    | 2.83 | 1.88 | 16.04 |
| MODEL.PDB | O, C_THR_941   | NZ, C_LYS_825  | HZ1, C_LYS_825  | 2.75 | 1.90 | 26.39 |
| MODEL.PDB | O, C_SER_939   | NZ, C_LYS_825  | HZ2, C_LYS_825  | 2.75 | 1.89 | 25.56 |
| MODEL.PDB | OE1, C_GLN_949 | N, C_THR_827   | H, C_THR_827    | 2.83 | 1.89 | 17.39 |
| MODEL.PDB | OD2, C_ASP_839 | N, C_LEU_841   | H, C_LEU_841    | 2.74 | 1.77 | 12.63 |
| MODEL.PDB | O, C_GLY_842   | N, C_ILE_844   | H, C_ILE_844    | 2.97 | 2.11 | 25.44 |
| MODEL.PDB | O, C_ARG_847   | N, C_LEU_849   | H, C_LEU_849    | 2.76 | 1.85 | 21.40 |
| MODEL.PDB | O, C_ALA_829   | NE2, C_GLN_853 | HE21, C_GLN_853 | 2.91 | 2.02 | 23.17 |
| MODEL.PDB | OD1, B_ASP_614 | NZ, C_LYS_854  | HZ2, C_LYS_854  | 2.69 | 1.71 | 10.87 |
| MODEL.PDB | O, C_SER_735   | N, C_THR_859   | H, C_THR_859    | 2.93 | 2.02 | 20.98 |
| MODEL.PDB | O, C_LYS_733   | N, C_LEU_861   | H, C_LEU_861    | 2.79 | 1.82 | 12.47 |
| MODEL.PDB | OD1, C_ASP_775 | N, C_LEU_864   | H, C_LEU_864    | 2.76 | 1.77 | 10.42 |
| MODEL.PDB | O, C_ASP_867   | N, C_ALA_871   | H, C_ALA_871    | 2.87 | 1.88 | 10.37 |
| MODEL.PDB | O, C_MET_869   | N, C_TYR_873   | H, C_TYR_873    | 2.99 | 2.02 | 12.67 |
| MODEL.PDB | O, C_ILE_870   | N, C_THR_874   | H, C_THR_874    | 2.98 | 2.00 | 12.06 |
| MODEL.PDB | OE1, C_GLU_819 | OG1, C_THR_874 | HG1, C_THR_874  | 2.71 | 1.77 | 10.99 |
| MODEL.PDB | O, C_ALA_871   | N, C_SER_875   | H, C_SER_875    | 3.00 | 2.01 | 8.94  |
| MODEL.PDB | O, C_THR_874   | N, C_LEU_878   | H, C_LEU_878    | 2.92 | 1.97 | 16.46 |
| MODEL.PDB | O, C_SER_875   | N, C_ALA_879   | H, C_ALA_879    | 2.82 | 1.83 | 9.71  |
| MODEL.PDB | O, C_LEU_877   | N, C_THR_881   | H, C_THR_881    | 2.92 | 1.93 | 10.72 |
| MODEL.PDB | O, C_ALA_879   | N, C_THR_883   | H, C_THR_883    | 2.97 | 2.03 | 17.08 |
| MODEL.PDB | O, C_GLY_880   | N, C_SER_884   | H, C_SER_884    | 2.81 | 1.86 | 15.30 |
| MODEL.PDB | O, C_THR_887   | N, C_GLY_891   | H, C_GLY_891    | 2.92 | 1.93 | 8.63  |
| MODEL.PDB | O, C_THR_881   | NE2, C_GLN_901 | HE22, C_GLN_901 | 2.78 | 1.85 | 18.56 |
| MODEL.PDB | O, C_PHE_898   | N, C_MET_902   | H, C_MET_902    | 2.93 | 1.96 | 13.47 |
| MODEL.PDB | O, C_ALA_899   | N, C_ALA_903   | H, C_ALA_903    | 2.87 | 1.90 | 12.92 |
| MODEL.PDB | O, C_GLY_885   | NH2, C_ARG_905 | HH21, C_ARG_905 | 2.82 | 1.97 | 26.49 |
| MODEL.PDB | O, C_MET_902   | N, C_PHE_906   | H, C_PHE_906    | 2.85 | 1.86 | 8.76  |
| MODEL.PDB | O, C_TYR_904   | N, C_GLY_908   | H, C_GLY_908    | 2.76 | 1.80 | 15.11 |
| MODEL.PDB | O, C_ASN_907   | N, C_GLY_910   | H, C_GLY_910    | 2.99 | 2.15 | 27.40 |
| MODEL.PDB | O, C_PHE_906   | N, C_VAL_911   | H, C_VAL_911    | 2.94 | 1.95 | 9.20  |
| MODEL.PDB | O, C_ASN_914   | N, C_GLU_918   | H, C_GLU_918    | 2.97 | 1.96 | 1.50  |
| MODEL.PDB | O, C_VAL_915   | ND2, C_ASN_919 | HD21, C_ASN_919 | 2.89 | 1.92 | 12.77 |
| MODEL.PDB | O, C_GLY_798   | NE2, C_GLN_920 | HE21, C_GLN_920 | 2.95 | 2.00 | 16.18 |
| MODEL.PDB | O, C_GLN_920   | N, C_ALA_924   | H, C_ALA_924    | 2.98 | 1.99 | 9.05  |
| MODEL.PDB | O, C_LEU_922   | N, C_GLN_926   | H, C_GLN_926    | 2.91 | 1.93 | 10.60 |
| MODEL.PDB | O, C_ILE_923   | N, C_PHE_927   | H, C_PHE_927    | 2.93 | 1.96 | 12.72 |
| MODEL.PDB | O, C_ALA_924   | N, C_ASN_928   | H, C_ASN_928    | 2.92 | 1.93 | 9.88  |
| MODEL.PDB | O, C_ASN_925   | OG, C_SER_929  | HG, C_SER_929   | 2.74 | 1.83 | 13.62 |
| MODEL.PDB | O, C_GLN_926   | N, C_ALA_930   | H, C_ALA_930    | 2.91 | 1.97 | 16.97 |
| MODEL.PDB | O, C_PHE_927   | N, C_ILE_931   | H, C_ILE_931    | 3.00 | 2.00 | 7.96  |
| MODEL.PDB | O, C_LYS_933   | N, C_SER_937   | H, C_SER_937    | 2.87 | 1.89 | 11.80 |
| MODEL.PDB | O, C_ILE_934   | N, C_LEU_938   | H, C_LEU_938    | 2.91 | 1.91 | 7.48  |
| MODEL.PDB | O, C_GLN_935   | N, C_SER_939   | H, C_SER_939    | 2.83 | 1.89 | 17.96 |
| MODEL.PDB | OD1, C_ASN_953 | NE2, C_GLN_949 | HE21, C_GLN_949 | 2.95 | 1.94 | 2.22  |
| MODEL.PDB | O, C_GLY_946   | N, C_ASP_950   | H, C_ASP_950    | 2.84 | 1.85 | 9.19  |
| MODEL.PDB | O, C_GLN_949   | N, C_ASN_953   | H, C_ASN_953    | 2.77 | 1.79 | 9.50  |
| MODEL.PDB | O, C_ASP_950   | N, C_GLN_954   | H, C_GLN_954    | 2.84 | 1.86 | 10.76 |
| MODEL.PDB | O, C_VAL_952   | N, C_ALA_956   | H, C_ALA_956    | 2.97 | 1.98 | 9.55  |
| MODEL.PDB | O, C_ASN_953   | N, C_GLN_957   | H, C_GLN_957    | 2.82 | 1.85 | 12.26 |
| MODEL.PDB | O, C_GLN_954   | N, C_ALA_958   | H, C_ALA_958    | 2.91 | 1.95 | 15.56 |
| MODEL.PDB | O, C_ASN_955   | N, C_LEU_959   | H, C_LEU_959    | 2.99 | 1.99 | 6.77  |
| MODEL.PDB | O, C_ALA_956   | N, C_ASN_960   | H, C_ASN_960    | 2.93 | 1.95 | 10.97 |
| MODEL.PDB | O, C_GLN_957   | N, C_THR_961   | H, C_THR_961    | 2.89 | 1.95 | 17.35 |

|           |                |                |                 |      |      |       |
|-----------|----------------|----------------|-----------------|------|------|-------|
| MODEL.PDB | O, C_GLN_957   | OG1, C_THR_961 | HG1, C_THR_961  | 2.62 | 1.72 | 16.71 |
| MODEL.PDB | O, C_ALA_958   | N, C_LEU_962   | H, C_LEU_962    | 2.96 | 1.99 | 14.16 |
| MODEL.PDB | O, C_LEU_959   | N, C_VAL_963   | H, C_VAL_963    | 2.89 | 1.90 | 7.75  |
| MODEL.PDB | O, C_ASN_960   | N, C_LYS_964   | H, C_LYS_964    | 2.92 | 1.96 | 15.00 |
| MODEL.PDB | OG, C_SER_967  | NZ, C_LYS_964  | HZ2, C_LYS_964  | 2.75 | 1.91 | 27.16 |
| MODEL.PDB | OG, A_SER_758  | NE2, C_GLN_965 | HE21, C_GLN_965 | 2.97 | 2.12 | 27.09 |
| MODEL.PDB | O, A_GLN_755   | N, C_PHE_970   | H, C_PHE_970    | 2.83 | 1.85 | 12.65 |
| MODEL.PDB | O, C_ASN_969   | N, C_ALA_972   | H, C_ALA_972    | 2.99 | 2.02 | 13.68 |
| MODEL.PDB | OE1, C_GLN_992 | N, C_ILE_973   | H, C_ILE_973    | 2.85 | 1.91 | 16.70 |
| MODEL.PDB | O, C_LEU_966   | OG, C_SER_975  | HG, C_SER_975   | 2.60 | 1.67 | 11.20 |
| MODEL.PDB | O, B_THR_547   | ND2, C_ASN_978 | HD21, C_ASN_978 | 2.84 | 1.92 | 19.82 |
| MODEL.PDB | O, C_ASN_978   | N, C_SER_982   | H, C_SER_982    | 2.79 | 1.87 | 19.11 |
| MODEL.PDB | O, C_ASP_979   | N, C_ARG_983   | H, C_ARG_983    | 2.93 | 1.97 | 15.14 |
| MODEL.PDB | OE1, C_GLU_748 | NZ, C_LYS_986  | HZ2, C_LYS_986  | 2.53 | 1.54 | 9.58  |
| MODEL.PDB | OD2, C_ASP_985 | N, C_VAL_987   | H, C_VAL_987    | 2.92 | 1.98 | 17.86 |
| MODEL.PDB | O, C_ASP_985   | N, C_ALA_989   | H, C_ALA_989    | 2.82 | 1.89 | 18.83 |
| MODEL.PDB | O, C_ALA_989   | N, C_ILE_993   | H, C_ILE_993    | 2.87 | 1.88 | 9.75  |
| MODEL.PDB | O, C_GLU_990   | N, C_ASP_994   | H, C_ASP_994    | 2.75 | 1.77 | 11.32 |
| MODEL.PDB | OD1, A_ASP_994 | NH1, C_ARG_995 | HH12, C_ARG_995 | 2.65 | 1.64 | 2.91  |
| MODEL.PDB | O, C_PHE_970   | NH2, C_ARG_995 | HH21, C_ARG_995 | 2.82 | 1.85 | 12.87 |
| MODEL.PDB | OD2, A_ASP_994 | NH2, C_ARG_995 | HH22, C_ARG_995 | 2.64 | 1.67 | 12.83 |
| MODEL.PDB | O, C_ILE_993   | N, C_ILE_997   | H, C_ILE_997    | 2.81 | 1.84 | 12.90 |
| MODEL.PDB | O, C_ASP_994   | N, C_THR_998   | H, C_THR_998    | 2.94 | 1.94 | 4.03  |

Table 3: The side chain and main chain hydrogen bonding networks. In this table, the residue naming scheme is **Chain ID\_residue name\_residue number**,  $\angle ADH$  represents the angle formed by acceptor (A), donor (D) and hydrogen (H) ( $\angle ADH$ ).

| PDB       | Acceptor (A)   | Donor (D)      | Hydrogen (H)    | D-A (Å) | H-A (Å) | $\angle ADH(^{\circ})$ |
|-----------|----------------|----------------|-----------------|---------|---------|------------------------|
| MODEL.PDB | OE2, A_GLU_191 | NH1, A_ARG_34  | HH11, A_ARG_34  | 2.67    | 1.78    | 22.19                  |
| MODEL.PDB | OD1, A_ASP_40  | NH1, A_ARG_44  | HH12, A_ARG_44  | 2.70    | 1.70    | 6.73                   |
| MODEL.PDB | OD2, A_ASP_40  | NH2, A_ARG_44  | HH22, A_ARG_44  | 2.63    | 1.66    | 12.76                  |
| MODEL.PDB | OD2, A_ASP_138 | NH1, A_ARG_78  | HH11, A_ARG_78  | 2.69    | 1.82    | 24.44                  |
| MODEL.PDB | OE1, A_GLU_191 | OH, A_TYR_91   | HH, A_TYR_91    | 2.70    | 1.78    | 13.73                  |
| MODEL.PDB | OH, A_TYR_37   | NZ, A_LYS_195  | HZ2, A_LYS_195  | 2.76    | 1.80    | 13.93                  |
| MODEL.PDB | OE2, C_GLU_516 | OH, A_TYR_200  | HH, A_TYR_200   | 2.56    | 1.75    | 25.87                  |
| MODEL.PDB | OE2, A_GLU_224 | NZ, A_LYS_206  | HZ3, A_LYS_206  | 2.70    | 1.79    | 20.97                  |
| MODEL.PDB | OD1, A_ASP_215 | NE, A_ARG_214  | HE, A_ARG_214   | 2.96    | 2.08    | 24.64                  |
| MODEL.PDB | OD1, A_ASP_215 | NH1, A_ARG_214 | HH11, A_ARG_214 | 2.72    | 1.80    | 19.02                  |
| MODEL.PDB | OE2, A_GLU_191 | OG, A_SER_221  | HG, A_SER_221   | 2.68    | 1.80    | 18.27                  |
| MODEL.PDB | OD1, A_ASP_290 | NH2, A_ARG_273 | HH21, A_ARG_273 | 2.62    | 1.69    | 18.86                  |
| MODEL.PDB | OD1, A_ASN_280 | OG1, A_THR_286 | HG1, A_THR_286  | 2.71    | 1.94    | 29.85                  |
| MODEL.PDB | OG, A_SER_50   | NZ, A_LYS_304  | HZ3, A_LYS_304  | 2.91    | 1.95    | 14.53                  |
| MODEL.PDB | OD1, A_ASP_663 | NZ, A_LYS_310  | HZ2, A_LYS_310  | 2.63    | 1.74    | 22.20                  |
| MODEL.PDB | OE2, A_GLU_298 | OG, A_SER_316  | HG, A_SER_316   | 2.68    | 1.73    | 6.59                   |
| MODEL.PDB | OD2, B_ASP_737 | NH1, A_ARG_319 | HH12, A_ARG_319 | 2.74    | 1.78    | 15.71                  |
| MODEL.PDB | OD1, A_ASP_398 | NE, A_ARG_355  | HE, A_ARG_355   | 2.67    | 1.68    | 10.27                  |
| MODEL.PDB | OD2, A_ASP_398 | NH2, A_ARG_355 | HH21, A_ARG_355 | 2.63    | 1.83    | 29.83                  |
| MODEL.PDB | OD1, A_ASN_394 | OG, A_SER_359  | HG, A_SER_359   | 2.65    | 1.78    | 19.43                  |
| MODEL.PDB | OG, A_SER_383  | NZ, A_LYS_386  | HZ1, A_LYS_386  | 2.87    | 2.00    | 24.63                  |
| MODEL.PDB | OE1, A_GLU_516 | ND2, A_ASN_394 | HD21, A_ASN_394 | 2.79    | 1.83    | 15.55                  |
| MODEL.PDB | OE1, A_GLN_506 | ND2, A_ASN_437 | HD22, A_ASN_437 | 2.76    | 1.75    | 1.26                   |
| MODEL.PDB | OE1, A_GLN_498 | ND2, A_ASN_448 | HD21, A_ASN_448 | 2.95    | 2.09    | 25.72                  |
| MODEL.PDB | OE1, A_GLU_471 | NZ, A_LYS_458  | HZ1, A_LYS_458  | 2.43    | 1.55    | 23.29                  |
| MODEL.PDB | OE2, A_GLU_465 | ND2, A_ASN_460 | HD21, A_ASN_460 | 2.81    | 1.80    | 4.71                   |
| MODEL.PDB | OD1, A_ASP_467 | NE, A_ARG_466  | HE, A_ARG_466   | 2.70    | 1.70    | 7.41                   |
| MODEL.PDB | OD2, A_ASP_467 | NH1, A_ARG_466 | HH11, A_ARG_466 | 2.66    | 1.80    | 25.17                  |
| MODEL.PDB | OD2, A_ASP_442 | NE, A_ARG_509  | HE, A_ARG_509   | 2.69    | 1.74    | 14.88                  |
| MODEL.PDB | OD1, A_ASP_442 | NH1, A_ARG_509 | HH11, A_ARG_509 | 2.80    | 1.80    | 3.45                   |
| MODEL.PDB | OD2, A_ASP_574 | NZ, A_LYS_557  | HZ1, A_LYS_557  | 2.65    | 1.80    | 26.29                  |
| MODEL.PDB | OD1, A_ASP_568 | NZ, A_LYS_557  | HZ2, A_LYS_557  | 2.72    | 1.90    | 29.52                  |
| MODEL.PDB | OE1, A_GLN_564 | NH2, A_ARG_577 | HH22, A_ARG_577 | 2.71    | 1.88    | 28.37                  |
| MODEL.PDB | OH, A_TYR_636  | NE2, A_GLN_607 | HE22, A_GLN_607 | 2.96    | 2.00    | 15.28                  |
| MODEL.PDB | OD2, A_ASP_627 | NE2, A_GLN_628 | HE21, A_GLN_628 | 2.77    | 1.86    | 20.74                  |
| MODEL.PDB | OG1, A_THR_632 | OG1, A_THR_630 | HG1, A_THR_630  | 2.93    | 2.01    | 13.87                  |
| MODEL.PDB | OD1, A_ASN_658 | OH, A_TYR_660  | HH, A_TYR_660   | 2.82    | 1.96    | 21.62                  |
| MODEL.PDB | OD2, A_ASP_663 | OG, A_SER_673  | HG, A_SER_673   | 2.68    | 1.81    | 20.07                  |
| MODEL.PDB | OD1, A_ASN_710 | OG, A_SER_708  | HG, A_SER_708   | 2.64    | 1.84    | 27.39                  |
| MODEL.PDB | OD2, A_ASP_775 | NZ, A_LYS_733  | HZ3, A_LYS_733  | 2.60    | 1.62    | 11.48                  |
| MODEL.PDB | OG1, C_THR_961 | NH2, A_ARG_765 | HH22, A_ARG_765 | 2.95    | 1.98    | 13.10                  |
| MODEL.PDB | OD2, A_ASP_808 | OG, A_SER_810  | HG, A_SER_810   | 2.73    | 1.94    | 28.41                  |
| MODEL.PDB | OD1, A_ASP_820 | NH1, A_ARG_815 | HH11, A_ARG_815 | 2.65    | 1.73    | 19.61                  |
| MODEL.PDB | OG1, A_THR_734 | NZ, A_LYS_854  | HZ3, A_LYS_854  | 2.90    | 2.01    | 23.94                  |
| MODEL.PDB | OD2, C_ASP_614 | OG1, A_THR_859 | HG1, A_THR_859  | 2.83    | 1.95    | 19.70                  |
| MODEL.PDB | OE2, A_GLU_819 | OG1, A_THR_874 | HG1, A_THR_874  | 2.63    | 1.71    | 12.98                  |
| MODEL.PDB | OD1, A_ASP_936 | NE2, A_GLN_935 | HE21, A_GLN_935 | 2.78    | 1.84    | 17.00                  |
| MODEL.PDB | OD1, A_ASN_953 | NE2, A_GLN_949 | HE21, A_GLN_949 | 2.96    | 1.95    | 3.82                   |
| MODEL.PDB | OE1, A_GLN_965 | OG, A_SER_968  | HG, A_SER_968   | 2.75    | 1.97    | 29.51                  |
| MODEL.PDB | OD2, B_ASP_994 | NH1, A_ARG_995 | HH12, A_ARG_995 | 2.69    | 1.68    | 3.63                   |
| MODEL.PDB | OD1, B_ASP_994 | NH2, A_ARG_995 | HH22, A_ARG_995 | 2.66    | 1.65    | 4.49                   |
| MODEL.PDB | OE2, B_GLU_191 | NH1, B_ARG_34  | HH11, B_ARG_34  | 2.59    | 1.61    | 10.99                  |
| MODEL.PDB | OG1, B_THR_114 | OG1, B_THR_109 | HG1, B_THR_109  | 2.95    | 2.04    | 16.45                  |
| MODEL.PDB | OG1, B_THR_167 | NE2, B_GLN_115 | HE22, B_GLN_115 | 2.93    | 1.99    | 17.65                  |
| MODEL.PDB | OD1, B_ASN_211 | ND2, B_ASN_185 | HD22, B_ASN_185 | 2.96    | 1.98    | 11.82                  |
| MODEL.PDB | OD1, B_ASP_53  | NZ, B_LYS_195  | HZ1, B_LYS_195  | 2.67    | 1.77    | 21.61                  |
| MODEL.PDB | OH, B_TYR_37   | NZ, B_LYS_195  | HZ2, B_LYS_195  | 2.81    | 1.83    | 10.84                  |

|           |                |                |                 |      |      |       |
|-----------|----------------|----------------|-----------------|------|------|-------|
| MODEL.PDB | OE2, B_GLU_224 | NZ, B_LYS_206  | HZ1, B_LYS_206  | 2.61 | 1.63 | 10.77 |
| MODEL.PDB | OE1, B_GLU_154 | OG, B_SER_247  | HG, B_SER_247   | 2.58 | 1.63 | 5.81  |
| MODEL.PDB | OD2, B_ASP_290 | NE, B_ARG_273  | HE, B_ARG_273   | 2.67 | 1.80 | 24.19 |
| MODEL.PDB | OD1, B_ASP_290 | NH2, B_ARG_273 | HH21, B_ARG_273 | 2.63 | 1.66 | 12.98 |
| MODEL.PDB | OD2, B_ASP_287 | NZ, B_LYS_278  | HZ1, B_LYS_278  | 2.60 | 1.60 | 3.72  |
| MODEL.PDB | OG, B_SER_50   | NZ, B_LYS_304  | HZ1, B_LYS_304  | 2.84 | 1.83 | 5.53  |
| MODEL.PDB | OD2, B_ASP_663 | NZ, B_LYS_310  | HZ3, B_LYS_310  | 2.62 | 1.67 | 16.87 |
| MODEL.PDB | OE1, B_GLN_580 | NE, B_ARG_328  | HE, B_ARG_328   | 2.68 | 1.70 | 11.58 |
| MODEL.PDB | OD2, B_ASP_398 | NH2, B_ARG_355 | HH21, B_ARG_355 | 2.60 | 1.63 | 13.35 |
| MODEL.PDB | OG1, B_THR_523 | OG, B_SER_359  | HG, B_SER_359   | 2.73 | 1.79 | 9.26  |
| MODEL.PDB | OD1, B_ASP_364 | OG, B_SER_366  | HG, B_SER_366   | 2.74 | 1.87 | 20.38 |
| MODEL.PDB | OG, B_SER_373  | OG, B_SER_371  | HG, B_SER_371   | 2.84 | 1.90 | 10.21 |
| MODEL.PDB | OG1, B_THR_376 | NZ, B_LYS_378  | HZ3, B_LYS_378  | 2.86 | 1.89 | 13.06 |
| MODEL.PDB | OE2, B_GLU_516 | OG1, B_THR_393 | HG1, B_THR_393  | 2.60 | 1.68 | 12.70 |
| MODEL.PDB | OD2, B_ASP_398 | OH, B_TYR_423  | HH, B_TYR_423   | 2.64 | 1.73 | 15.03 |
| MODEL.PDB | OD1, B_ASN_460 | NZ, B_LYS_424  | HZ2, B_LYS_424  | 2.64 | 1.68 | 12.99 |
| MODEL.PDB | OE1, B_GLN_506 | ND2, B_ASN_437 | HD22, B_ASN_437 | 2.76 | 1.76 | 7.71  |
| MODEL.PDB | OD2, B_ASP_442 | OG, B_SER_438  | HG, B_SER_438   | 2.68 | 1.74 | 9.15  |
| MODEL.PDB | OD1, B_ASN_440 | NZ, B_LYS_444  | HZ1, B_LYS_444  | 2.69 | 1.88 | 29.21 |
| MODEL.PDB | OD2, B_ASP_442 | OH, B_TYR_451  | HH, B_TYR_451   | 2.68 | 1.72 | 0.75  |
| MODEL.PDB | OD1, B_ASP_420 | ND2, B_ASN_460 | HD21, B_ASN_460 | 2.68 | 1.79 | 21.99 |
| MODEL.PDB | OD1, B_ASN_487 | OH, B_TYR_489  | HH, B_TYR_489   | 2.67 | 1.80 | 20.09 |
| MODEL.PDB | OD1, B_ASP_442 | NH1, B_ARG_509 | HH11, B_ARG_509 | 2.67 | 1.81 | 24.93 |
| MODEL.PDB | OD2, B_ASP_389 | NZ, B_LYS_528  | HZ3, B_LYS_528  | 2.66 | 1.77 | 22.25 |
| MODEL.PDB | OE2, B_GLU_554 | NZ, B_LYS_535  | HZ3, B_LYS_535  | 2.58 | 1.58 | 6.75  |
| MODEL.PDB | OD2, B_ASP_586 | NZ, B_LYS_557  | HZ3, B_LYS_557  | 2.63 | 1.78 | 26.14 |
| MODEL.PDB | OE1, B_GLU_619 | OG, B_SER_591  | HG, B_SER_591   | 2.62 | 1.73 | 18.48 |
| MODEL.PDB | OG1, B_THR_632 | NE, B_ARG_634  | HE, B_ARG_634   | 2.87 | 1.95 | 20.06 |
| MODEL.PDB | OD2, B_ASP_614 | NH1, B_ARG_646 | HH12, B_ARG_646 | 2.84 | 1.93 | 20.79 |
| MODEL.PDB | OD1, B_ASN_710 | OG, B_SER_708  | HG, B_SER_708   | 2.65 | 1.81 | 23.38 |
| MODEL.PDB | OD2, C_ASP_796 | ND2, B_ASN_709 | HD21, B_ASN_709 | 2.69 | 1.82 | 25.22 |
| MODEL.PDB | OG1, B_THR_734 | OG1, B_THR_732 | HG1, B_THR_732  | 2.80 | 2.02 | 29.06 |
| MODEL.PDB | OD2, B_ASP_775 | NZ, B_LYS_733  | HZ1, B_LYS_733  | 2.58 | 1.59 | 8.03  |
| MODEL.PDB | OE1, A_GLU_702 | NZ, B_LYS_790  | HZ2, B_LYS_790  | 2.57 | 1.72 | 25.91 |
| MODEL.PDB | OD1, B_ASN_801 | NE2, B_GLN_804 | HE21, B_GLN_804 | 2.93 | 1.97 | 14.52 |
| MODEL.PDB | OD1, B_ASP_820 | NE, B_ARG_815  | HE, B_ARG_815   | 2.83 | 1.98 | 26.93 |
| MODEL.PDB | OD1, B_ASP_820 | NH1, B_ARG_815 | HH11, B_ARG_815 | 2.70 | 1.79 | 20.55 |
| MODEL.PDB | OD1, B_ASP_867 | NH2, B_ARG_815 | HH21, B_ARG_815 | 2.92 | 2.02 | 21.93 |
| MODEL.PDB | OD2, A_ASP_614 | OG1, B_THR_859 | HG1, B_THR_859  | 2.98 | 2.16 | 26.02 |
| MODEL.PDB | OE2, B_GLU_819 | OG1, B_THR_874 | HG1, B_THR_874  | 2.73 | 1.83 | 16.33 |
| MODEL.PDB | OD1, B_ASN_953 | NE2, B_GLN_949 | HE21, B_GLN_949 | 2.81 | 1.84 | 12.61 |
| MODEL.PDB | OD2, B_ASP_979 | NE, B_ARG_983  | HE, B_ARG_983   | 2.71 | 1.71 | 5.22  |
| MODEL.PDB | OD1, B_ASP_979 | NH2, B_ARG_983 | HH21, B_ARG_983 | 2.61 | 1.64 | 12.14 |
| MODEL.PDB | OE2, B_GLU_988 | NE2, B_GLN_992 | HE21, B_GLN_992 | 2.70 | 1.70 | 2.13  |
| MODEL.PDB | OD1, C_ASP_994 | NH1, B_ARG_995 | HH12, B_ARG_995 | 2.64 | 1.64 | 8.73  |
| MODEL.PDB | OD2, C_ASP_53  | OG1, C_THR_51  | HG1, C_THR_51   | 2.80 | 2.01 | 28.71 |
| MODEL.PDB | OD1, C_ASP_253 | NZ, C_LYS_97   | HZ2, C_LYS_97   | 2.69 | 1.77 | 19.23 |
| MODEL.PDB | OE2, B_GLU_471 | NZ, C_LYS_113  | HZ1, C_LYS_113  | 2.68 | 1.73 | 15.31 |
| MODEL.PDB | OD1, C_ASN_125 | ND2, C_ASN_122 | HD21, C_ASN_122 | 2.84 | 1.89 | 16.55 |
| MODEL.PDB | OE2, C_GLU_169 | NZ, C_LYS_129  | HZ3, C_LYS_129  | 2.46 | 1.53 | 17.71 |
| MODEL.PDB | OE1, C_GLU_154 | NZ, C_LYS_150  | HZ3, C_LYS_150  | 2.61 | 1.79 | 28.77 |
| MODEL.PDB | OH, C_TYR_204  | NZ, C_LYS_195  | HZ2, C_LYS_195  | 2.89 | 1.88 | 6.24  |
| MODEL.PDB | OD2, C_ASP_228 | NZ, C_LYS_202  | HZ2, C_LYS_202  | 2.76 | 1.94 | 28.81 |
| MODEL.PDB | OE2, C_GLU_191 | OG1, C_THR_208 | HG1, C_THR_208  | 2.86 | 1.90 | 5.11  |
| MODEL.PDB | OE1, C_GLU_156 | NH1, C_ARG_246 | HH12, C_ARG_246 | 2.76 | 1.76 | 7.38  |
| MODEL.PDB | OE2, C_GLU_156 | NH2, C_ARG_246 | HH22, C_ARG_246 | 2.61 | 1.71 | 21.34 |
| MODEL.PDB | OD2, C_ASP_290 | NH2, C_ARG_273 | HH22, C_ARG_273 | 2.55 | 1.66 | 21.76 |
| MODEL.PDB | OE2, C_GLU_298 | OG1, C_THR_315 | HG1, C_THR_315  | 2.64 | 1.70 | 8.17  |

|           |                |                |                 |      |      |       |
|-----------|----------------|----------------|-----------------|------|------|-------|
| MODEL.PDB | OE1, C_GLN_580 | NE, C_ARG_328  | HE, C_ARG_328   | 2.78 | 1.86 | 19.60 |
| MODEL.PDB | OD2, C_ASP_578 | NH1, C_ARG_328 | HH12, C_ARG_328 | 2.60 | 1.78 | 28.67 |
| MODEL.PDB | OE1, C_GLN_580 | NH2, C_ARG_328 | HH21, C_ARG_328 | 2.90 | 2.05 | 27.29 |
| MODEL.PDB | OD2, C_ASP_467 | OH, C_TYR_351  | HH, C_TYR_351   | 2.53 | 1.60 | 11.08 |
| MODEL.PDB | OD1, C_ASP_398 | NE, C_ARG_355  | HE, C_ARG_355   | 2.62 | 1.64 | 10.97 |
| MODEL.PDB | OD2, C_ASP_398 | NH2, C_ARG_355 | HH21, C_ARG_355 | 2.58 | 1.57 | 3.27  |
| MODEL.PDB | OD1, C_ASN_394 | OG, C_SER_359  | HG, C_SER_359   | 2.97 | 2.15 | 25.84 |
| MODEL.PDB | OD1, C_ASP_364 | OG, C_SER_366  | HG, C_SER_366   | 2.68 | 1.81 | 20.57 |
| MODEL.PDB | OH, C_TYR_380  | NZ, C_LYS_378  | HZ3, C_LYS_378  | 2.93 | 1.99 | 17.96 |
| MODEL.PDB | OD1, C_ASN_460 | NZ, C_LYS_424  | HZ2, C_LYS_424  | 2.69 | 1.71 | 11.25 |
| MODEL.PDB | OD2, C_ASP_442 | OG, C_SER_438  | HG, C_SER_438   | 2.57 | 1.73 | 23.01 |
| MODEL.PDB | OD1, C_ASP_420 | ND2, C_ASN_460 | HD22, C_ASN_460 | 2.79 | 1.85 | 17.42 |
| MODEL.PDB | OD1, C_ASP_467 | OG, C_SER_469  | HG, C_SER_469   | 2.78 | 1.89 | 17.62 |
| MODEL.PDB | OE1, C_GLN_474 | OH, C_TYR_489  | HH, C_TYR_489   | 2.76 | 1.82 | 9.42  |
| MODEL.PDB | OD1, C_ASP_442 | NH1, C_ARG_509 | HH11, C_ARG_509 | 2.58 | 1.62 | 14.24 |
| MODEL.PDB | OE1, C_GLU_554 | NZ, C_LYS_535  | HZ3, C_LYS_535  | 2.65 | 1.79 | 24.99 |
| MODEL.PDB | OE2, C_GLU_554 | NZ, C_LYS_535  | HZ3, C_LYS_535  | 2.72 | 1.89 | 27.95 |
| MODEL.PDB | OE2, C_GLU_324 | NZ, C_LYS_537  | HZ3, C_LYS_537  | 2.54 | 1.67 | 24.70 |
| MODEL.PDB | OD2, A_ASP_745 | OG1, C_THR_549 | HG1, C_THR_549  | 2.94 | 2.12 | 25.69 |
| MODEL.PDB | OD1, C_ASP_586 | OG, C_SER_555  | HG, C_SER_555   | 2.61 | 1.67 | 9.67  |
| MODEL.PDB | OD2, C_ASP_574 | NZ, C_LYS_557  | HZ3, C_LYS_557  | 2.58 | 1.76 | 27.92 |
| MODEL.PDB | OD2, C_ASP_294 | OG, C_SER_637  | HG, C_SER_637   | 2.56 | 1.75 | 25.96 |
| MODEL.PDB | OD2, A_ASP_848 | NH2, C_ARG_646 | HH22, C_ARG_646 | 2.63 | 1.79 | 27.55 |
| MODEL.PDB | OD2, C_ASP_663 | OG, C_SER_673  | HG, C_SER_673   | 2.61 | 1.66 | 4.96  |
| MODEL.PDB | OG, C_SER_689  | OG1, C_THR_676 | HG1, C_THR_676  | 2.79 | 1.86 | 11.33 |
| MODEL.PDB | OE1, C_GLN_677 | ND2, C_ASN_679 | HD21, C_ASN_679 | 2.90 | 1.93 | 13.29 |
| MODEL.PDB | OD2, A_ASP_796 | ND2, C_ASN_709 | HD21, C_ASN_709 | 2.70 | 1.85 | 25.89 |
| MODEL.PDB | OD2, C_ASP_775 | NZ, C_LYS_733  | HZ3, C_LYS_733  | 2.58 | 1.60 | 11.03 |
| MODEL.PDB | OE2, C_GLU_748 | OG1, C_THR_747 | HG1, C_THR_747  | 2.89 | 2.01 | 18.92 |
| MODEL.PDB | OG, B_SER_704  | NZ, C_LYS_790  | HZ1, C_LYS_790  | 2.84 | 1.83 | 1.48  |
| MODEL.PDB | OD1, B_ASP_614 | NZ, C_LYS_854  | HZ2, C_LYS_854  | 2.69 | 1.71 | 10.87 |
| MODEL.PDB | OE1, C_GLU_819 | OG1, C_THR_874 | HG1, C_THR_874  | 2.71 | 1.77 | 10.99 |
| MODEL.PDB | OD1, C_ASN_953 | NE2, C_GLN_949 | HE21, C_GLN_949 | 2.95 | 1.94 | 2.22  |
| MODEL.PDB | OG, C_SER_967  | NZ, C_LYS_964  | HZ2, C_LYS_964  | 2.75 | 1.91 | 27.16 |
| MODEL.PDB | OG, A_SER_758  | NE2, C_GLN_965 | HE21, C_GLN_965 | 2.97 | 2.12 | 27.09 |
| MODEL.PDB | OE1, C_GLU_748 | NZ, C_LYS_986  | HZ2, C_LYS_986  | 2.53 | 1.54 | 9.58  |
| MODEL.PDB | OD1, A_ASP_994 | NH1, C_ARG_995 | HH12, C_ARG_995 | 2.65 | 1.64 | 2.91  |
| MODEL.PDB | OD2, A_ASP_994 | NH2, C_ARG_995 | HH22, C_ARG_995 | 2.64 | 1.67 | 12.83 |

Table 4: Side chain hydrogen bonding network analysis. In this table, the residue naming scheme is **Chain ID\_residue name\_residue number**,  $\angle ADH$  represents the angle formed by acceptor (A), donor (D) and hydrogen (H) ( $\angle ADH$ ).

| PDB ID | Residue A  | Atom A | Residue B  | Atom B | Distance (Å) |
|--------|------------|--------|------------|--------|--------------|
| MODEL  | A_ARG.319  | NH1    | B_ASP.737  | OD2    | 2.735        |
| MODEL  | A_ARG.319  | NH1    | B_ASP.745  | OD1    | 3.587        |
| MODEL  | A_ARG.319  | NH2    | B_ASP.737  | OD2    | 3.982        |
| MODEL  | A_LYS.790  | NZ     | C_GLU.702  | OE1    | 2.623        |
| MODEL  | A_LYS.790  | NZ     | C_GLU.702  | OE2    | 2.744        |
| MODEL  | A_ARG.995  | NH1    | B_ASP.994  | OD1    | 3.497        |
| MODEL  | A_ARG.995  | NH1    | B_ASP.994  | OD2    | 2.691        |
| MODEL  | A_ARG.995  | NH2    | B_ASP.994  | OD1    | 2.657        |
| MODEL  | A_ARG.995  | NH2    | B_ASP.994  | OD2    | 3.473        |
| MODEL  | A_ARG.1039 | NH2    | B_GLU.1031 | OE1    | 3.621        |
| MODEL  | A_ARG.1039 | NH2    | B_GLU.1031 | OE2    | 2.620        |
| MODEL  | B_ARG.319  | NH1    | C_ASP.745  | OD1    | 2.606        |
| MODEL  | B_ARG.319  | NH1    | C_ASP.745  | OD2    | 3.565        |
| MODEL  | B_ARG.319  | NH2    | C_ASP.745  | OD1    | 3.325        |
| MODEL  | B_ARG.319  | NH2    | C_ASP.745  | OD2    | 2.636        |
| MODEL  | B_LYS.790  | NZ     | A_GLU.702  | OE1    | 2.570        |
| MODEL  | B_LYS.790  | NZ     | A_GLU.702  | OE2    | 3.570        |
| MODEL  | B_LYS.854  | NZ     | A_ASP.614  | OD1    | 3.487        |
| MODEL  | B_LYS.986  | NZ     | C_ASP.427  | OD2    | 3.985        |
| MODEL  | B_ARG.995  | NH1    | C_ASP.994  | OD1    | 2.636        |
| MODEL  | B_ARG.995  | NH1    | C_ASP.994  | OD2    | 3.371        |
| MODEL  | B_ARG.995  | NH2    | C_ASP.994  | OD1    | 3.182        |
| MODEL  | B_ARG.995  | NH2    | C_ASP.994  | OD2    | 2.637        |
| MODEL  | B_ARG.1039 | NH2    | C_GLU.1031 | OE1    | 2.711        |
| MODEL  | B_ARG.1039 | NH2    | C_GLU.1031 | OE2    | 3.989        |
| MODEL  | C_LYS.113  | NZ     | B_GLU.471  | OE2    | 2.679        |
| MODEL  | C_ARG.319  | NH1    | A_ASP.745  | OD1    | 3.819        |
| MODEL  | C_LYS.458  | NZ     | A_ASP.389  | OD2    | 3.696        |
| MODEL  | C_ARG.646  | NH1    | A_ASP.848  | OD2    | 3.643        |
| MODEL  | C_ARG.646  | NH2    | A_ASP.848  | OD1    | 3.695        |
| MODEL  | C_ARG.646  | NH2    | A_ASP.848  | OD2    | 2.627        |
| MODEL  | C_ARG.847  | NH1    | B_GLU.619  | OE1    | 3.034        |
| MODEL  | C_LYS.854  | NZ     | B_ASP.614  | OD1    | 2.686        |
| MODEL  | C_ARG.995  | NH1    | A_ASP.994  | OD1    | 2.647        |
| MODEL  | C_ARG.995  | NH1    | A_ASP.994  | OD2    | 3.498        |
| MODEL  | C_ARG.995  | NH2    | A_ASP.994  | OD1    | 3.382        |
| MODEL  | C_ARG.995  | NH2    | A_ASP.994  | OD2    | 2.636        |
| MODEL  | C_ARG.1019 | NH1    | B_GLU.1017 | OE2    | 2.726        |
| MODEL  | C_ARG.1019 | NH2    | B_GLU.1017 | OE2    | 3.415        |
| MODEL  | C_ARG.1039 | NH2    | A_GLU.1031 | OE1    | 3.509        |
| MODEL  | C_ARG.1039 | NH2    | A_GLU.1031 | OE2    | 2.596        |

Table 5: Interfacial salt bridging network analysis within the PDB entries. In this table, the residue naming scheme is **Chain ID\_residue name\_residue number**.

| Count | Residue A | Residue B |
|-------|-----------|-----------|
| 12    | ARG995    | ASP994    |
| 6     | ARG319    | ASP745    |
| 6     | ARG1039   | GLU1031   |
| 4     | LYS790    | GLU702    |
| 3     | ARG646    | ASP848    |
| 2     | ARG319    | ASP737    |
| 2     | LYS854    | ASP614    |
| 2     | ARG1019   | GLU1017   |
| 1     | LYS986    | ASP427    |
| 1     | ARG847    | GLU619    |
| 1     | LYS113    | GLU471    |
| 1     | LYS458    | ASP389    |

Table 6: Counting of interfacial salt bridges within the PDB entries in Table 5.



| PDB ID | Residue A  | Atom A | Residue B  | Atom B | Distance (Å) |
|--------|------------|--------|------------|--------|--------------|
| MODEL  | A_ARG_34   | NH1    | A_GLU_191  | OE2    | 2.674        |
| MODEL  | A_ARG_44   | NH1    | A_ASP_40   | OD1    | 2.695        |
| MODEL  | A_ARG_44   | NH1    | A_ASP_40   | OD2    | 3.232        |
| MODEL  | A_ARG_44   | NH2    | A_ASP_40   | OD1    | 3.625        |
| MODEL  | A_ARG_44   | NH2    | A_ASP_40   | OD2    | 2.635        |
| MODEL  | A_ARG_78   | NH1    | A_ASP_138  | OD2    | 2.688        |
| MODEL  | A_ARG_102  | NH1    | A_GLU_96   | OE1    | 3.329        |
| MODEL  | A_LYS_195  | NZ     | A_ASP_53   | OD1    | 2.683        |
| MODEL  | A_LYS_195  | NZ     | A_ASP_53   | OD2    | 2.722        |
| MODEL  | A_LYS_206  | NZ     | A_GLU_224  | OE1    | 2.749        |
| MODEL  | A_LYS_206  | NZ     | A_GLU_224  | OE2    | 2.697        |
| MODEL  | A_ARG_214  | NH1    | A_ASP_215  | OD1    | 2.721        |
| MODEL  | A_ARG_214  | NH1    | A_ASP_215  | OD2    | 3.669        |
| MODEL  | A_ARG_273  | NH2    | A_ASP_290  | OD1    | 2.616        |
| MODEL  | A_ARG_273  | NH2    | A_ASP_290  | OD2    | 3.058        |
| MODEL  | A_LYS_278  | NZ     | A_ASP_287  | OD2    | 3.755        |
| MODEL  | A_LYS_310  | NZ     | A_ASP_663  | OD1    | 2.628        |
| MODEL  | A_LYS_310  | NZ     | A_ASP_663  | OD2    | 2.667        |
| MODEL  | A_ARG_319  | NH1    | B_ASP_737  | OD2    | 2.735        |
| MODEL  | A_ARG_319  | NH1    | B_ASP_745  | OD1    | 3.587        |
| MODEL  | A_ARG_319  | NH2    | B_ASP_737  | OD2    | 3.982        |
| MODEL  | A_ARG_328  | NH1    | A_ASP_578  | OD2    | 3.263        |
| MODEL  | A_ARG_328  | NH2    | A_ASP_578  | OD2    | 3.964        |
| MODEL  | A_ARG_355  | NH2    | A_ASP_398  | OD1    | 3.101        |
| MODEL  | A_ARG_355  | NH2    | A_ASP_398  | OD2    | 2.632        |
| MODEL  | A_LYS_356  | NZ     | A_GLU_340  | OE1    | 2.636        |
| MODEL  | A_ARG_403  | NH1    | A_GLU_406  | OE2    | 3.089        |
| MODEL  | A_LYS_458  | NZ     | A_GLU_471  | OE1    | 2.430        |
| MODEL  | A_ARG_466  | NH1    | A_ASP_467  | OD1    | 3.188        |
| MODEL  | A_ARG_466  | NH1    | A_ASP_467  | OD2    | 2.659        |
| MODEL  | A_ARG_509  | NH1    | A_ASP_442  | OD1    | 2.803        |
| MODEL  | A_ARG_509  | NH1    | A_ASP_442  | OD2    | 3.407        |
| MODEL  | A_LYS_537  | NZ     | A_GLU_324  | OE1    | 2.730        |
| MODEL  | A_LYS_537  | NZ     | A_GLU_324  | OE2    | 2.652        |
| MODEL  | A_LYS_557  | NZ     | A_ASP_568  | OD1    | 2.715        |
| MODEL  | A_LYS_557  | NZ     | A_ASP_568  | OD2    | 2.782        |
| MODEL  | A_LYS_557  | NZ     | A_ASP_574  | OD1    | 2.869        |
| MODEL  | A_LYS_557  | NZ     | A_ASP_574  | OD2    | 2.649        |
| MODEL  | A_ARG_567  | NH1    | A_ASP_571  | OD1    | 2.606        |
| MODEL  | A_ARG_567  | NH2    | A_ASP_571  | OD1    | 2.720        |
| MODEL  | A_LYS_733  | NZ     | A_ASP_775  | OD1    | 3.202        |
| MODEL  | A_LYS_733  | NZ     | A_ASP_775  | OD2    | 2.601        |
| MODEL  | A_LYS_790  | NZ     | C_GLU_702  | OE1    | 2.623        |
| MODEL  | A_LYS_790  | NZ     | C_GLU_702  | OE2    | 2.744        |
| MODEL  | A_LYS_811  | NZ     | A_ASP_820  | OD2    | 2.461        |
| MODEL  | A_ARG_815  | NH1    | A_ASP_820  | OD1    | 2.649        |
| MODEL  | A_LYS_986  | NZ     | A_GLU_748  | OE2    | 2.597        |
| MODEL  | A_ARG_995  | NH1    | B_ASP_994  | OD1    | 3.497        |
| MODEL  | A_ARG_995  | NH1    | B_ASP_994  | OD2    | 2.691        |
| MODEL  | A_ARG_995  | NH2    | B_ASP_994  | OD1    | 2.657        |
| MODEL  | A_ARG_995  | NH2    | B_ASP_994  | OD2    | 3.473        |
| MODEL  | A_ARG_1019 | NH1    | A_GLU_773  | OE1    | 2.777        |
| MODEL  | A_ARG_1019 | NH2    | A_GLU_780  | OE1    | 3.073        |
| MODEL  | A_ARG_1019 | NH2    | A_GLU_780  | OE2    | 3.823        |
| MODEL  | A_LYS_1028 | NZ     | A_GLU_725  | OE1    | 2.878        |
| MODEL  | A_LYS_1028 | NZ     | A_GLU_725  | OE2    | 2.589        |
| MODEL  | A_ARG_1039 | NH1    | A_GLU_1031 | OE1    | 2.697        |

|       |            |     |            |     |       |
|-------|------------|-----|------------|-----|-------|
| MODEL | A_ARG.1039 | NH1 | A_GLU.1031 | OE2 | 3.642 |
| MODEL | A_ARG.1039 | NH2 | B_GLU.1031 | OE1 | 3.621 |
| MODEL | A_ARG.1039 | NH2 | B_GLU.1031 | OE2 | 2.620 |
| MODEL | A_HIS.1064 | NE2 | A_GLU.725  | OE1 | 2.720 |
| MODEL | A_HIS.1083 | ND1 | A_ASP.1084 | OD1 | 3.726 |
| MODEL | A_HIS.1083 | NE2 | A_ASP.1084 | OD1 | 2.954 |
| MODEL | A_HIS.1083 | NE2 | A_ASP.1084 | OD2 | 3.064 |
| MODEL | A_LYS.1086 | NZ  | A_ASP.1084 | OD2 | 2.860 |
| MODEL | B_ARG.34   | NH1 | B_GLU.191  | OE2 | 2.594 |
| MODEL | B_ARG.78   | NH2 | B_ASP.80   | OD1 | 3.853 |
| MODEL | B_ARG.78   | NH2 | B_ASP.80   | OD2 | 3.115 |
| MODEL | B_LYS.195  | NZ  | B_ASP.53   | OD1 | 2.671 |
| MODEL | B_LYS.195  | NZ  | B_ASP.53   | OD2 | 2.656 |
| MODEL | B_LYS.206  | NZ  | B_GLU.224  | OE1 | 3.459 |
| MODEL | B_LYS.206  | NZ  | B_GLU.224  | OE2 | 2.611 |
| MODEL | B_ARG.273  | NH2 | B_ASP.290  | OD1 | 2.633 |
| MODEL | B_ARG.273  | NH2 | B_ASP.290  | OD2 | 3.259 |
| MODEL | B_LYS.278  | NZ  | B_ASP.287  | OD2 | 2.604 |
| MODEL | B_LYS.310  | NZ  | B_ASP.663  | OD1 | 2.691 |
| MODEL | B_LYS.310  | NZ  | B_ASP.663  | OD2 | 2.615 |
| MODEL | B_ARG.319  | NH1 | C_ASP.745  | OD1 | 2.606 |
| MODEL | B_ARG.319  | NH1 | C_ASP.745  | OD2 | 3.565 |
| MODEL | B_ARG.319  | NH2 | C_ASP.745  | OD1 | 3.325 |
| MODEL | B_ARG.319  | NH2 | C_ASP.745  | OD2 | 2.636 |
| MODEL | B_ARG.328  | NH1 | B_ASP.578  | OD2 | 3.286 |
| MODEL | B_ARG.328  | NH2 | B_ASP.578  | OD1 | 3.906 |
| MODEL | B_ARG.328  | NH2 | B_ASP.578  | OD2 | 2.659 |
| MODEL | B_ARG.355  | NH2 | B_ASP.398  | OD2 | 2.596 |
| MODEL | B_ARG.403  | NH1 | B_GLU.406  | OE2 | 2.630 |
| MODEL | B_ARG.403  | NH2 | B_GLU.406  | OE2 | 3.754 |
| MODEL | B_ARG.408  | NH1 | B_ASP.405  | OD1 | 2.895 |
| MODEL | B_ARG.408  | NH1 | B_ASP.405  | OD2 | 2.755 |
| MODEL | B_ARG.408  | NH2 | B_ASP.405  | OD2 | 3.887 |
| MODEL | B_ARG.454  | NH1 | B_ASP.467  | OD2 | 2.590 |
| MODEL | B_LYS.462  | NZ  | B_GLU.465  | OE2 | 3.504 |
| MODEL | B_ARG.509  | NH1 | B_ASP.442  | OD1 | 2.673 |
| MODEL | B_ARG.509  | NH1 | B_ASP.442  | OD2 | 3.881 |
| MODEL | B_LYS.528  | NZ  | B_ASP.389  | OD2 | 2.658 |
| MODEL | B_LYS.535  | NZ  | B_GLU.554  | OE2 | 2.577 |
| MODEL | B_LYS.537  | NZ  | B_GLU.324  | OE1 | 2.634 |
| MODEL | B_LYS.537  | NZ  | B_GLU.324  | OE2 | 2.706 |
| MODEL | B_LYS.557  | NZ  | B_ASP.586  | OD1 | 2.689 |
| MODEL | B_LYS.557  | NZ  | B_ASP.586  | OD2 | 2.627 |
| MODEL | B_ARG.567  | NH1 | B_ASP.571  | OD1 | 2.826 |
| MODEL | B_ARG.567  | NH1 | B_ASP.571  | OD2 | 2.786 |
| MODEL | B_ARG.567  | NH2 | B_ASP.571  | OD1 | 3.551 |
| MODEL | B_HIS.625  | ND1 | B_ASP.627  | OD2 | 3.516 |
| MODEL | B_HIS.625  | NE2 | B_ASP.627  | OD2 | 3.967 |
| MODEL | B_ARG.646  | NH1 | B_ASP.614  | OD2 | 2.839 |
| MODEL | B_LYS.733  | NZ  | B_ASP.775  | OD1 | 3.016 |
| MODEL | B_LYS.733  | NZ  | B_ASP.775  | OD2 | 2.582 |
| MODEL | B_LYS.776  | NZ  | B_GLU.780  | OE1 | 2.710 |
| MODEL | B_LYS.776  | NZ  | B_GLU.780  | OE2 | 2.672 |
| MODEL | B_LYS.790  | NZ  | A_GLU.702  | OE1 | 2.570 |
| MODEL | B_LYS.790  | NZ  | A_GLU.702  | OE2 | 3.570 |
| MODEL | B_ARG.815  | NH1 | B_ASP.820  | OD1 | 2.696 |
| MODEL | B_ARG.815  | NH2 | B_ASP.867  | OD1 | 2.920 |
| MODEL | B_ARG.815  | NH2 | B_GLU.868  | OE2 | 3.311 |

|       |            |     |            |     |       |
|-------|------------|-----|------------|-----|-------|
| MODEL | B_LYS_854  | NZ  | A_ASP_614  | OD1 | 3.487 |
| MODEL | B_ARG_983  | NH2 | B_ASP_979  | OD1 | 2.614 |
| MODEL | B_ARG_983  | NH2 | B_ASP_979  | OD2 | 3.538 |
| MODEL | B_LYS_986  | NZ  | C_ASP_427  | OD2 | 3.985 |
| MODEL | B_ARG_995  | NH1 | C_ASP_994  | OD1 | 2.636 |
| MODEL | B_ARG_995  | NH1 | C_ASP_994  | OD2 | 3.371 |
| MODEL | B_ARG_995  | NH2 | C_ASP_994  | OD1 | 3.182 |
| MODEL | B_ARG_995  | NH2 | C_ASP_994  | OD2 | 2.637 |
| MODEL | B_ARG_1019 | NH1 | B_GLU_773  | OE1 | 3.284 |
| MODEL | B_ARG_1019 | NH1 | B_GLU_773  | OE2 | 2.600 |
| MODEL | B_LYS_1028 | NZ  | B_GLU_725  | OE1 | 2.732 |
| MODEL | B_LYS_1028 | NZ  | B_GLU_725  | OE2 | 2.670 |
| MODEL | B_ARG_1039 | NH1 | B_GLU_1031 | OE1 | 2.669 |
| MODEL | B_ARG_1039 | NH1 | B_GLU_1031 | OE2 | 3.057 |
| MODEL | B_ARG_1039 | NH2 | C_GLU_1031 | OE1 | 2.711 |
| MODEL | B_ARG_1039 | NH2 | C_GLU_1031 | OE2 | 3.989 |
| MODEL | B_LYS_1045 | NZ  | B_ASP_1041 | OD1 | 2.637 |
| MODEL | B_HIS_1064 | NE2 | B_GLU_725  | OE2 | 2.768 |
| MODEL | B_LYS_1086 | NZ  | B_ASP_1084 | OD2 | 2.620 |
| MODEL | C_LYS_97   | NZ  | C_GLU_96   | OE2 | 2.761 |
| MODEL | C_LYS_97   | NZ  | C_ASP_253  | OD1 | 2.693 |
| MODEL | C_LYS_97   | NZ  | C_ASP_253  | OD2 | 2.866 |
| MODEL | C_LYS_113  | NZ  | B_GLU_471  | OE2 | 2.679 |
| MODEL | C_LYS_129  | NZ  | C_GLU_169  | OE1 | 2.582 |
| MODEL | C_LYS_129  | NZ  | C_GLU_169  | OE2 | 2.463 |
| MODEL | C_LYS_150  | NZ  | C_GLU_154  | OE1 | 2.608 |
| MODEL | C_LYS_150  | NZ  | C_GLU_154  | OE2 | 2.752 |
| MODEL | C_ARG_158  | NH2 | C_GLU_154  | OE2 | 3.189 |
| MODEL | C_LYS_187  | NZ  | C_GLU_180  | OE2 | 2.873 |
| MODEL | C_LYS_202  | NZ  | C_ASP_228  | OD2 | 2.762 |
| MODEL | C_ARG_246  | NH1 | C_GLU_156  | OE1 | 2.756 |
| MODEL | C_ARG_246  | NH1 | C_GLU_156  | OE2 | 3.170 |
| MODEL | C_ARG_246  | NH2 | C_GLU_156  | OE1 | 3.528 |
| MODEL | C_ARG_246  | NH2 | C_GLU_156  | OE2 | 2.612 |
| MODEL | C_ARG_273  | NH1 | C_ASP_290  | OD1 | 2.966 |
| MODEL | C_ARG_273  | NH1 | C_ASP_290  | OD2 | 3.840 |
| MODEL | C_ARG_273  | NH2 | C_ASP_290  | OD1 | 2.966 |
| MODEL | C_ARG_273  | NH2 | C_ASP_290  | OD2 | 2.552 |
| MODEL | C_LYS_310  | NZ  | C_ASP_663  | OD1 | 3.129 |
| MODEL | C_ARG_319  | NH1 | A_ASP_745  | OD1 | 3.819 |
| MODEL | C_ARG_328  | NH1 | C_ASP_578  | OD2 | 2.598 |
| MODEL | C_ARG_328  | NH2 | C_ASP_578  | OD1 | 3.708 |
| MODEL | C_ARG_328  | NH2 | C_ASP_578  | OD2 | 2.801 |
| MODEL | C_ARG_355  | NH2 | C_ASP_398  | OD1 | 3.407 |
| MODEL | C_ARG_355  | NH2 | C_ASP_398  | OD2 | 2.579 |
| MODEL | C_LYS_356  | NZ  | C_GLU_340  | OE1 | 2.568 |
| MODEL | C_ARG_403  | NH1 | C_GLU_406  | OE1 | 3.581 |
| MODEL | C_ARG_403  | NH1 | C_GLU_406  | OE2 | 2.672 |
| MODEL | C_ARG_403  | NH2 | C_GLU_406  | OE2 | 2.658 |
| MODEL | C_LYS_458  | NZ  | A_ASP_389  | OD2 | 3.696 |
| MODEL | C_LYS_462  | NZ  | C_GLU_465  | OE1 | 2.614 |
| MODEL | C_LYS_462  | NZ  | C_GLU_465  | OE2 | 2.647 |
| MODEL | C_ARG_509  | NH1 | C_ASP_442  | OD1 | 2.578 |
| MODEL | C_LYS_528  | NZ  | C_ASP_389  | OD1 | 3.189 |
| MODEL | C_LYS_528  | NZ  | C_ASP_389  | OD2 | 3.148 |
| MODEL | C_LYS_535  | NZ  | C_GLU_554  | OE1 | 2.654 |
| MODEL | C_LYS_535  | NZ  | C_GLU_554  | OE2 | 2.723 |
| MODEL | C_LYS_537  | NZ  | C_GLU_324  | OE2 | 2.535 |

|       |            |     |            |     |       |
|-------|------------|-----|------------|-----|-------|
| MODEL | C_LYS_557  | NZ  | C_ASP_568  | OD1 | 2.816 |
| MODEL | C_LYS_557  | NZ  | C_ASP_568  | OD2 | 2.819 |
| MODEL | C_LYS_557  | NZ  | C_ASP_574  | OD1 | 3.661 |
| MODEL | C_LYS_557  | NZ  | C_ASP_574  | OD2 | 2.584 |
| MODEL | C_ARG_567  | NH1 | C_ASP_571  | OD1 | 3.523 |
| MODEL | C_ARG_567  | NH1 | C_ASP_571  | OD2 | 2.610 |
| MODEL | C_ARG_567  | NH2 | C_ASP_571  | OD1 | 2.539 |
| MODEL | C_ARG_567  | NH2 | C_ASP_571  | OD2 | 3.300 |
| MODEL | C_ARG_646  | NH1 | A_ASP_848  | OD2 | 3.643 |
| MODEL | C_ARG_646  | NH2 | A_ASP_848  | OD1 | 3.695 |
| MODEL | C_ARG_646  | NH2 | A_ASP_848  | OD2 | 2.627 |
| MODEL | C_LYS_733  | NZ  | C_ASP_775  | OD1 | 3.066 |
| MODEL | C_LYS_733  | NZ  | C_ASP_775  | OD2 | 2.575 |
| MODEL | C_LYS_811  | NZ  | C_ASP_820  | OD2 | 3.817 |
| MODEL | C_ARG_815  | NH1 | C_ASP_820  | OD1 | 2.929 |
| MODEL | C_ARG_815  | NH1 | C_ASP_820  | OD2 | 2.916 |
| MODEL | C_ARG_815  | NH2 | C_ASP_820  | OD1 | 3.727 |
| MODEL | C_ARG_847  | NH1 | B_GLU_619  | OE1 | 3.034 |
| MODEL | C_LYS_854  | NZ  | B_ASP_614  | OD1 | 2.686 |
| MODEL | C_LYS_986  | NZ  | C_GLU_748  | OE1 | 2.531 |
| MODEL | C_ARG_995  | NH1 | A_ASP_994  | OD1 | 2.647 |
| MODEL | C_ARG_995  | NH1 | A_ASP_994  | OD2 | 3.498 |
| MODEL | C_ARG_995  | NH2 | A_ASP_994  | OD1 | 3.382 |
| MODEL | C_ARG_995  | NH2 | A_ASP_994  | OD2 | 2.636 |
| MODEL | C_ARG_1019 | NH1 | B_GLU_1017 | OE2 | 2.726 |
| MODEL | C_ARG_1019 | NH1 | C_GLU_773  | OE2 | 2.647 |
| MODEL | C_ARG_1019 | NH2 | B_GLU_1017 | OE2 | 3.415 |
| MODEL | C_LYS_1028 | NZ  | C_GLU_725  | OE1 | 2.678 |
| MODEL | C_LYS_1028 | NZ  | C_GLU_725  | OE2 | 2.787 |
| MODEL | C_ARG_1039 | NH1 | C_GLU_1031 | OE1 | 3.735 |
| MODEL | C_ARG_1039 | NH1 | C_GLU_1031 | OE2 | 2.669 |
| MODEL | C_ARG_1039 | NH2 | A_GLU_1031 | OE1 | 3.509 |
| MODEL | C_ARG_1039 | NH2 | A_GLU_1031 | OE2 | 2.596 |
| MODEL | C_HIS_1064 | NE2 | C_GLU_725  | OE1 | 2.774 |
| MODEL | C_LYS_1086 | NZ  | C_ASP_1084 | OD2 | 2.855 |

Table 7: MODE-specific salt bridging network analysis. In this table, the residue naming scheme is **Chain ID\_residue name\_residue number**

| PDB ID | Residue A  | Atom A | Residue B  | Atom B | Distance (Å) |
|--------|------------|--------|------------|--------|--------------|
| MODEL  | A_ARG_319  | NH1    | B_ASP_737  | OD2    | 2.735        |
| MODEL  | A_ARG_319  | NH1    | B_ASP_745  | OD1    | 3.587        |
| MODEL  | A_ARG_319  | NH2    | B_ASP_737  | OD2    | 3.982        |
| MODEL  | A_LYS_790  | NZ     | C_GLU_702  | OE1    | 2.623        |
| MODEL  | A_LYS_790  | NZ     | C_GLU_702  | OE2    | 2.744        |
| MODEL  | A_ARG_995  | NH1    | B_ASP_994  | OD1    | 3.497        |
| MODEL  | A_ARG_995  | NH1    | B_ASP_994  | OD2    | 2.691        |
| MODEL  | A_ARG_995  | NH2    | B_ASP_994  | OD1    | 2.657        |
| MODEL  | A_ARG_995  | NH2    | B_ASP_994  | OD2    | 3.473        |
| MODEL  | A_ARG_1039 | NH2    | B_GLU_1031 | OE1    | 3.621        |
| MODEL  | A_ARG_1039 | NH2    | B_GLU_1031 | OE2    | 2.620        |
| MODEL  | B_ARG_319  | NH1    | C_ASP_745  | OD1    | 2.606        |
| MODEL  | B_ARG_319  | NH1    | C_ASP_745  | OD2    | 3.565        |
| MODEL  | B_ARG_319  | NH2    | C_ASP_745  | OD1    | 3.325        |
| MODEL  | B_ARG_319  | NH2    | C_ASP_745  | OD2    | 2.636        |
| MODEL  | B_LYS_790  | NZ     | A_GLU_702  | OE1    | 2.570        |
| MODEL  | B_LYS_790  | NZ     | A_GLU_702  | OE2    | 3.570        |
| MODEL  | B_LYS_854  | NZ     | A_ASP_614  | OD1    | 3.487        |
| MODEL  | B_LYS_986  | NZ     | C_ASP_427  | OD2    | 3.985        |
| MODEL  | B_ARG_995  | NH1    | C_ASP_994  | OD1    | 2.636        |
| MODEL  | B_ARG_995  | NH1    | C_ASP_994  | OD2    | 3.371        |
| MODEL  | B_ARG_995  | NH2    | C_ASP_994  | OD1    | 3.182        |
| MODEL  | B_ARG_995  | NH2    | C_ASP_994  | OD2    | 2.637        |
| MODEL  | B_ARG_1039 | NH2    | C_GLU_1031 | OE1    | 2.711        |
| MODEL  | B_ARG_1039 | NH2    | C_GLU_1031 | OE2    | 3.989        |
| MODEL  | C_LYS_113  | NZ     | B_GLU_471  | OE2    | 2.679        |
| MODEL  | C_ARG_319  | NH1    | A_ASP_745  | OD1    | 3.819        |
| MODEL  | C_LYS_458  | NZ     | A_ASP_389  | OD2    | 3.696        |
| MODEL  | C_ARG_646  | NH1    | A_ASP_848  | OD2    | 3.643        |
| MODEL  | C_ARG_646  | NH2    | A_ASP_848  | OD1    | 3.695        |
| MODEL  | C_ARG_646  | NH2    | A_ASP_848  | OD2    | 2.627        |
| MODEL  | C_ARG_847  | NH1    | B_GLU_619  | OE1    | 3.034        |
| MODEL  | C_LYS_854  | NZ     | B_ASP_614  | OD1    | 2.686        |
| MODEL  | C_ARG_995  | NH1    | A_ASP_994  | OD1    | 2.647        |
| MODEL  | C_ARG_995  | NH1    | A_ASP_994  | OD2    | 3.498        |
| MODEL  | C_ARG_995  | NH2    | A_ASP_994  | OD1    | 3.382        |
| MODEL  | C_ARG_995  | NH2    | A_ASP_994  | OD2    | 2.636        |
| MODEL  | C_ARG_1019 | NH1    | B_GLU_1017 | OE2    | 2.726        |
| MODEL  | C_ARG_1019 | NH2    | B_GLU_1017 | OE2    | 3.415        |
| MODEL  | C_ARG_1039 | NH2    | A_GLU_1031 | OE1    | 3.509        |
| MODEL  | C_ARG_1039 | NH2    | A_GLU_1031 | OE2    | 2.596        |

Table 8: MODE-specific interfacial salt bridging network analysis. In this table, the residue naming scheme is **Chain ID\_residue name\_residue number**
